# Supplementary material for: In silico prediction of B-cell and T-cell epitopes of the Sudan Ebola virus glycoprotein for peptide-based vaccine design
Source: Research Square preprint supplement (doi:10.21203/rs.3.rs-6600860/v1), 2025-05-09
Supplement: Supplementary file 1 [file 3430a386f5d2defc6b5f1257.xlsx]

## Sheet: T-Cell.Epitopes.HLA.Structures.
allele	seq_num	start	end	length	peptide	core	icore	score	rank
HLA-A*01:01	1	1	9	9	YTENTSSYY	YTENTSSYY	YTENTSSYY	0.995683	0.01
HLA-B*57:01	15	1	9	9	KCNPNLHYW	KCNPNLHYW	KCNPNLHYW	0.986287	0.01
HLA-B*58:01	15	1	9	9	KCNPNLHYW	KCNPNLHYW	KCNPNLHYW	0.979182	0.01
HLA-A*03:01	17	1	9	9	RTYTILNRK	RTYTILNRK	RTYTILNRK	0.97582	0.01
HLA-A*02:03	51	1	9	9	FLYDRLAST	FLYDRLAST	FLYDRLAST	0.973294	0.01
HLA-B*40:01	7	1	9	9	GEELSFEAL	GEELSFEAL	GEELSFEAL	0.962984	0.02
HLA-A*11:01	17	1	9	9	RTYTILNRK	RTYTILNRK	RTYTILNRK	0.962813	0.01
HLA-A*01:01	3	1	9	9	ISDRATRKY	ISDRATRKY	ISDRATRKY	0.96092	0.01
HLA-A*68:02	67	1	9	9	EVTEIDQLV	EVTEIDQLV	EVTEIDQLV	0.947822	0.01
HLA-A*03:01	23	1	9	9	RISDRATRK	RISDRATRK	RISDRATRK	0.934781	0.02
HLA-A*02:06	45	1	9	9	FQLNDTIHL	FQLNDTIHL	FQLNDTIHL	0.932028	0.03
HLA-A*02:01	51	1	9	9	FLYDRLAST	FLYDRLAST	FLYDRLAST	0.930102	0.03
HLA-A*31:01	24	1	9	9	RLASTVIYR	RLASTVIYR	RLASTVIYR	0.927934	0.01
HLA-B*40:01	34	1	9	9	SEQLRGEEL	SEQLRGEEL	SEQLRGEEL	0.918967	0.06
HLA-A*30:01	41	1	9	9	RSRRQTNTK	RSRRQTNTK	RSRRQTNTK	0.913003	0.01
HLA-A*03:01	24	1	9	9	RLASTVIYR	RLASTVIYR	RLASTVIYR	0.912452	0.03
HLA-B*40:01	35	1	9	9	LEVTEIDQL	LEVTEIDQL	LEVTEIDQL	0.899972	0.06
HLA-A*30:01	17	1	9	9	RTYTILNRK	RTYTILNRK	RTYTILNRK	0.891248	0.01
HLA-B*07:02	47	1	9	9	RPHTPQFLF	RPHTPQFLF	RPHTPQFLF	0.890261	0.05
HLA-B*40:01	20	1	9	9	TELRTYTIL	TELRTYTIL	TELRTYTIL	0.889041	0.07
HLA-B*15:01	36	1	9	9	QLRGEELSF	QLRGEELSF	QLRGEELSF	0.875597	0.03
HLA-A*11:01	93	1	9	9	STDIPSATK	STDIPSATK	STDIPSATK	0.874515	0.04
HLA-A*26:01	9	1	9	9	ETTQALQLF	ETTQALQLF	ETTQALQLF	0.870892	0.03
HLA-B*15:01	82	1	9	9	GVPPKVVSY	GVPPKVVSY	GVPPKVVSY	0.856645	0.04
HLA-A*68:02	46	1	9	9	DTIHLHQQL	DTIHLHQQL	DTIHLHQQL	0.84277	0.04
HLA-B*15:01	66	1	9	9	ILAKPKETF	ILAKPKETF	ILAKPKETF	0.83832	0.05
HLA-B*40:01	29	1	9	9	NETTQALQL	NETTQALQL	NETTQALQL	0.837659	0.09
HLA-A*02:06	51	1	9	9	FLYDRLAST	FLYDRLAST	FLYDRLAST	0.827523	0.07
HLA-B*35:01	90	1	9	9	GPCPGDYAF	GPCPGDYAF	GPCPGDYAF	0.819644	0.07
HLA-A*11:01	37	1	9	9	AQHSTTLFK	AQHSTTLFK	AQHSTTLFK	0.816118	0.07
HLA-A*32:01	44	1	9	9	KINQIIHDF	KINQIIHDF	KINQIIHDF	0.814521	0.02
HLA-A*03:01	37	1	9	9	AQHSTTLFK	AQHSTTLFK	AQHSTTLFK	0.813394	0.07
HLA-B*57:01	132	1	9	9	RATTELRTY	RATTELRTY	RATTELRTY	0.80572	0.2
HLA-A*03:01	19	1	9	9	ILGSLGLRK	ILGSLGLRK	ILGSLGLRK	0.79694	0.09
HLA-A*26:01	82	1	9	9	GVPPKVVSY	GVPPKVVSY	GVPPKVVSY	0.79064	0.04
HLA-A*31:01	17	1	9	9	RTYTILNRK	RTYTILNRK	RTYTILNRK	0.783485	0.07
HLA-B*35:01	38	1	9	9	YAFHKDGAF	YAFHKDGAF	YAFHKDGAF	0.781323	0.09
HLA-A*01:01	2	1	9	9	TSSYYATSY	TSSYYATSY	TSSYYATSY	0.781063	0.07
HLA-B*53:01	47	1	9	9	RPHTPQFLF	RPHTPQFLF	RPHTPQFLF	0.773204	0.04
HLA-A*68:02	70	1	9	9	ETAATIIGT	ETAATIIGT	ETAATIIGT	0.769651	0.06
HLA-A*30:01	37	1	9	9	AQHSTTLFK	AQHSTTLFK	AQHSTTLFK	0.767943	0.02
HLA-B*35:01	48	1	9	9	LANETTQAL	LANETTQAL	LANETTQAL	0.766198	0.09
HLA-A*68:02	112	1	9	9	ETFLQSPPI	ETFLQSPPI	ETFLQSPPI	0.76603	0.06
HLA-B*08:01	83	1	9	9	ILFQKAFSM	ILFQKAFSM	ILFQKAFSM	0.751377	0.05
HLA-B*40:01	10	1	9	9	AEGIYTEGL	AEGIYTEGL	AEGIYTEGL	0.734857	0.14
HLA-A*11:01	23	1	9	9	RISDRATRK	RISDRATRK	RISDRATRK	0.718075	0.13
HLA-A*02:01	45	1	9	9	FQLNDTIHL	FQLNDTIHL	FQLNDTIHL	0.71359	0.12
HLA-A*11:01	24	1	9	9	RLASTVIYR	RLASTVIYR	RLASTVIYR	0.709128	0.13
HLA-A*03:01	30	1	9	9	VIAFLILAK	VIAFLILAK	VIAFLILAK	0.708905	0.15
HLA-B*58:01	132	1	9	9	RATTELRTY	RATTELRTY	RATTELRTY	0.698884	0.19
HLA-B*35:01	47	1	9	9	RPHTPQFLF	RPHTPQFLF	RPHTPQFLF	0.696542	0.13
HLA-A*68:02	126	1	9	9	HTPQFLFQL	HTPQFLFQL	HTPQFLFQL	0.692646	0.09
HLA-B*35:01	87	1	9	9	NADIGEWAF	NADIGEWAF	NADIGEWAF	0.673732	0.13
HLA-A*11:01	73	1	9	9	QTNTKATGK	QTNTKATGK	QTNTKATGK	0.66536	0.16
HLA-A*02:01	83	1	9	9	ILFQKAFSM	ILFQKAFSM	ILFQKAFSM	0.652433	0.16
HLA-B*58:01	3	1	9	9	ISDRATRKY	ISDRATRKY	ISDRATRKY	0.64399	0.22
HLA-B*44:02	34	1	9	9	SEQLRGEEL	SEQLRGEEL	SEQLRGEEL	0.639977	0.12
HLA-A*30:02	82	1	9	9	GVPPKVVSY	GVPPKVVSY	GVPPKVVSY	0.636842	0.09
HLA-B*51:01	72	1	9	9	SPGMVPLHI	SPGMVPLHI	SPGMVPLHI	0.634327	0.11
HLA-A*68:02	143	1	9	9	TVTGILGSL	TVTGILGSL	TVTGILGSL	0.63408	0.11
HLA-A*31:01	157	1	9	9	ITKGRISDR	ITKGRISDR	ITKGRISDR	0.630348	0.19
HLA-B*57:01	3	1	9	9	ISDRATRKY	ISDRATRKY	ISDRATRKY	0.629858	0.37
HLA-A*26:01	46	1	9	9	DTIHLHQQL	DTIHLHQQL	DTIHLHQQL	0.619684	0.07
HLA-A*03:01	73	1	9	9	QTNTKATGK	QTNTKATGK	QTNTKATGK	0.612891	0.24
HLA-B*44:03	29	1	9	9	NETTQALQL	NETTQALQL	NETTQALQL	0.608623	0.19
HLA-A*30:02	132	1	9	9	RATTELRTY	RATTELRTY	RATTELRTY	0.606735	0.1
HLA-A*30:01	140	1	9	9	KFRKSSFFV	KFRKSSFFV	KFRKSSFFV	0.60392	0.08
HLA-A*11:01	30	1	9	9	VIAFLILAK	VIAFLILAK	VIAFLILAK	0.603159	0.21
HLA-A*30:02	5	1	9	9	YYATSYLEY	YYATSYLEY	YYATSYLEY	0.59986	0.11
HLA-A*26:01	60	1	9	9	TVIYRGVNF	TVIYRGVNF	TVIYRGVNF	0.598121	0.08
HLA-A*02:06	98	1	9	9	KAFSMPLGV	KAFSMPLGV	KAFSMPLGV	0.597219	0.17
HLA-A*30:02	2	1	9	9	TSSYYATSY	TSSYYATSY	TSSYYATSY	0.594609	0.11
HLA-A*24:02	5	1	9	9	YYATSYLEY	YYATSYLEY	YYATSYLEY	0.592863	0.15
HLA-B*44:03	34	1	9	9	SEQLRGEEL	SEQLRGEEL	SEQLRGEEL	0.591565	0.19
HLA-B*57:01	166	1	9	9	TTGRLIWTL	TTGRLIWTL	TTGRLIWTL	0.591461	0.41
HLA-B*07:02	96	1	9	9	GPTTEAPTL	GPTTEAPTL	GPTTEAPTL	0.576578	0.19
HLA-A*03:01	101	1	9	9	SLLQLPRDK	SLLQLPRDK	SLLQLPRDK	0.574318	0.27
HLA-A*68:02	134	1	9	9	TTPENITTA	TTPENITTA	TTPENITTA	0.574277	0.14
HLA-A*03:01	93	1	9	9	STDIPSATK	STDIPSATK	STDIPSATK	0.567977	0.27
HLA-A*68:01	17	1	9	9	RTYTILNRK	RTYTILNRK	RTYTILNRK	0.567693	0.53
HLA-A*26:01	1	1	9	9	YTENTSSYY	YTENTSSYY	YTENTSSYY	0.567237	0.09
HLA-A*30:01	23	1	9	9	RISDRATRK	RISDRATRK	RISDRATRK	0.565041	0.09
HLA-B*07:02	39	1	9	9	VPKNSPGMV	VPKNSPGMV	VPKNSPGMV	0.564257	0.2
HLA-B*57:01	44	1	9	9	KINQIIHDF	KINQIIHDF	KINQIIHDF	0.562066	0.45
HLA-A*32:01	66	1	9	9	ILAKPKETF	ILAKPKETF	ILAKPKETF	0.556976	0.07
HLA-A*03:01	41	1	9	9	RSRRQTNTK	RSRRQTNTK	RSRRQTNTK	0.553243	0.29
HLA-A*24:02	84	1	9	9	AFHKDGAFF	AFHKDGAFF	AFHKDGAFF	0.552266	0.17
HLA-B*57:01	27	1	9	9	VVSYEAGEW	VVSYEAGEW	VVSYEAGEW	0.550821	0.47
HLA-A*68:01	73	1	9	9	QTNTKATGK	QTNTKATGK	QTNTKATGK	0.550786	0.56
HLA-B*58:01	27	1	9	9	VVSYEAGEW	VVSYEAGEW	VVSYEAGEW	0.543257	0.29
HLA-A*30:02	1	1	9	9	YTENTSSYY	YTENTSSYY	YTENTSSYY	0.539101	0.14
HLA-A*68:01	93	1	9	9	STDIPSATK	STDIPSATK	STDIPSATK	0.535484	0.58
HLA-A*30:02	3	1	9	9	ISDRATRKY	ISDRATRKY	ISDRATRKY	0.531765	0.15
HLA-B*07:02	31	1	9	9	IPSSSPTTA	IPSSSPTTA	IPSSSPTTA	0.529292	0.22
HLA-A*68:02	54	1	9	9	ETITETAAT	ETITETAAT	ETITETAAT	0.529167	0.17
HLA-A*24:02	65	1	9	9	NFAEGVIAF	NFAEGVIAF	NFAEGVIAF	0.52815	0.18
HLA-B*08:01	55	1	9	9	FGAQHSTTL	FGAQHSTTL	FGAQHSTTL	0.526929	0.14
HLA-A*24:02	77	1	9	9	LFKIDNNTF	LFKIDNNTF	LFKIDNNTF	0.523941	0.18
HLA-A*23:01	5	1	9	9	YYATSYLEY	YYATSYLEY	YYATSYLEY	0.520172	0.15
HLA-A*24:02	66	1	9	9	ILAKPKETF	ILAKPKETF	ILAKPKETF	0.513703	0.19
HLA-B*15:01	44	1	9	9	KINQIIHDF	KINQIIHDF	KINQIIHDF	0.509925	0.29
HLA-B*07:02	22	1	9	9	TPENITTAV	TPENITTAV	TPENITTAV	0.494672	0.25
HLA-A*23:01	84	1	9	9	AFHKDGAFF	AFHKDGAFF	AFHKDGAFF	0.493525	0.16
HLA-A*23:01	66	1	9	9	ILAKPKETF	ILAKPKETF	ILAKPKETF	0.48537	0.17
HLA-A*32:01	83	1	9	9	ILFQKAFSM	ILFQKAFSM	ILFQKAFSM	0.484482	0.11
HLA-B*15:01	132	1	9	9	RATTELRTY	RATTELRTY	RATTELRTY	0.480989	0.32
HLA-A*23:01	65	1	9	9	NFAEGVIAF	NFAEGVIAF	NFAEGVIAF	0.478381	0.18
HLA-A*23:01	77	1	9	9	LFKIDNNTF	LFKIDNNTF	LFKIDNNTF	0.477856	0.18
HLA-B*44:02	29	1	9	9	NETTQALQL	NETTQALQL	NETTQALQL	0.476454	0.21
HLA-B*51:01	22	1	9	9	TPENITTAV	TPENITTAV	TPENITTAV	0.475351	0.22
HLA-B*35:01	2	1	9	9	TSSYYATSY	TSSYYATSY	TSSYYATSY	0.463012	0.25
HLA-A*30:02	11	1	9	9	HKDGAFFLY	HKDGAFFLY	HKDGAFFLY	0.457316	0.21
HLA-A*02:06	126	1	9	9	HTPQFLFQL	HTPQFLFQL	HTPQFLFQL	0.45712	0.3
HLA-B*58:01	44	1	9	9	KINQIIHDF	KINQIIHDF	KINQIIHDF	0.453687	0.36
HLA-A*32:01	15	1	9	9	KCNPNLHYW	KCNPNLHYW	KCNPNLHYW	0.453086	0.13
HLA-B*53:01	90	1	9	9	GPCPGDYAF	GPCPGDYAF	GPCPGDYAF	0.45208	0.16
HLA-A*31:01	171	1	9	9	TQALQLFLR	TQALQLFLR	TQALQLFLR	0.451122	0.43
HLA-A*02:03	63	1	9	9	LMHNQNALV	LMHNQNALV	LMHNQNALV	0.438616	0.29
HLA-B*57:01	9	1	9	9	ETTQALQLF	ETTQALQLF	ETTQALQLF	0.433656	0.64
HLA-B*57:01	18	1	9	9	KSSFFVWVI	KSSFFVWVI	KSSFFVWVI	0.430764	0.64
HLA-B*15:01	83	1	9	9	ILFQKAFSM	ILFQKAFSM	ILFQKAFSM	0.421684	0.41
HLA-A*68:01	24	1	9	9	RLASTVIYR	RLASTVIYR	RLASTVIYR	0.42126	0.8
HLA-B*35:01	65	1	9	9	NFAEGVIAF	NFAEGVIAF	NFAEGVIAF	0.420012	0.3
HLA-A*02:01	109	1	9	9	GLMHNQNAL	GLMHNQNAL	GLMHNQNAL	0.419704	0.34
HLA-A*02:06	123	1	9	9	VVTNSTLEV	VVTNSTLEV	VVTNSTLEV	0.415618	0.36
HLA-A*33:01	180	1	9	9	FLRATTELR	FLRATTELR	FLRATTELR	0.412813	0.26
HLA-B*07:02	72	1	9	9	SPGMVPLHI	SPGMVPLHI	SPGMVPLHI	0.408211	0.33
HLA-A*31:01	180	1	9	9	FLRATTELR	FLRATTELR	FLRATTELR	0.406874	0.52
HLA-B*35:01	1	1	9	9	YTENTSSYY	YTENTSSYY	YTENTSSYY	0.397734	0.32
HLA-A*02:06	141	1	9	9	GITGIIIAI	GITGIIIAI	GITGIIIAI	0.396994	0.39
HLA-A*02:03	83	1	9	9	ILFQKAFSM	ILFQKAFSM	ILFQKAFSM	0.395181	0.34
HLA-B*51:01	48	1	9	9	LANETTQAL	LANETTQAL	LANETTQAL	0.393392	0.31
HLA-B*58:01	166	1	9	9	TTGRLIWTL	TTGRLIWTL	TTGRLIWTL	0.392109	0.42
HLA-A*02:03	109	1	9	9	GLMHNQNAL	GLMHNQNAL	GLMHNQNAL	0.391353	0.35
HLA-B*15:01	38	1	9	9	YAFHKDGAF	YAFHKDGAF	YAFHKDGAF	0.38834	0.44
HLA-A*31:01	129	1	9	9	KIDNNTFVR	KIDNNTFVR	KIDNNTFVR	0.386575	0.56
HLA-B*40:01	14	1	9	9	AENCYNLEI	AENCYNLEI	AENCYNLEI	0.38612	0.39
HLA-B*51:01	39	1	9	9	VPKNSPGMV	VPKNSPGMV	VPKNSPGMV	0.385533	0.31
HLA-A*02:03	168	1	9	9	QLKSVGLNL	QLKSVGLNL	QLKSVGLNL	0.384181	0.36
HLA-A*11:01	129	1	9	9	KIDNNTFVR	KIDNNTFVR	KIDNNTFVR	0.381959	0.44
HLA-A*31:01	41	1	9	9	RSRRQTNTK	RSRRQTNTK	RSRRQTNTK	0.380271	0.57
HLA-A*68:01	30	1	9	9	VIAFLILAK	VIAFLILAK	VIAFLILAK	0.379327	0.9
HLA-A*32:01	82	1	9	9	GVPPKVVSY	GVPPKVVSY	GVPPKVVSY	0.377945	0.17
HLA-A*33:01	157	1	9	9	ITKGRISDR	ITKGRISDR	ITKGRISDR	0.372382	0.31
HLA-A*03:01	32	1	9	9	HLASTDQLK	HLASTDQLK	HLASTDQLK	0.366481	0.53
HLA-A*02:06	83	1	9	9	ILFQKAFSM	ILFQKAFSM	ILFQKAFSM	0.3644	0.44
HLA-A*11:01	19	1	9	9	ILGSLGLRK	ILGSLGLRK	ILGSLGLRK	0.36371	0.47
HLA-B*35:01	31	1	9	9	IPSSSPTTA	IPSSSPTTA	IPSSSPTTA	0.362225	0.35
HLA-B*53:01	87	1	9	9	NADIGEWAF	NADIGEWAF	NADIGEWAF	0.360393	0.23
HLA-B*57:01	66	1	9	9	ILAKPKETF	ILAKPKETF	ILAKPKETF	0.360179	0.79
HLA-B*35:01	22	1	9	9	TPENITTAV	TPENITTAV	TPENITTAV	0.359272	0.36
HLA-A*30:02	13	1	9	9	GTGPCPGDY	GTGPCPGDY	GTGPCPGDY	0.359117	0.33
HLA-A*68:02	105	1	9	9	SSYYATSYL	SSYYATSYL	SSYYATSYL	0.357673	0.33
HLA-B*15:01	60	1	9	9	TVIYRGVNF	TVIYRGVNF	TVIYRGVNF	0.355689	0.5
HLA-B*51:01	31	1	9	9	IPSSSPTTA	IPSSSPTTA	IPSSSPTTA	0.353713	0.38
HLA-B*53:01	72	1	9	9	SPGMVPLHI	SPGMVPLHI	SPGMVPLHI	0.352933	0.23
HLA-B*15:01	26	1	9	9	FQKAFSMPL	FQKAFSMPL	FQKAFSMPL	0.350497	0.52
HLA-A*03:01	170	1	9	9	QLNDTIHLH	QLNDTIHLH	QLNDTIHLH	0.349607	0.56
HLA-A*11:01	82	1	9	9	GVPPKVVSY	GVPPKVVSY	GVPPKVVSY	0.342846	0.52
HLA-B*58:01	66	1	9	9	ILAKPKETF	ILAKPKETF	ILAKPKETF	0.336221	0.5
HLA-A*30:01	73	1	9	9	QTNTKATGK	QTNTKATGK	QTNTKATGK	0.33617	0.34
HLA-A*03:01	174	1	9	9	GIYTEGLMH	GIYTEGLMH	GIYTEGLMH	0.329539	0.6
HLA-A*68:01	32	1	9	9	HLASTDQLK	HLASTDQLK	HLASTDQLK	0.327372	1.1
HLA-B*58:01	9	1	9	9	ETTQALQLF	ETTQALQLF	ETTQALQLF	0.321539	0.52
HLA-A*02:06	134	1	9	9	TTPENITTA	TTPENITTA	TTPENITTA	0.315663	0.54
HLA-A*30:01	24	1	9	9	RLASTVIYR	RLASTVIYR	RLASTVIYR	0.314414	0.4
HLA-B*35:01	82	1	9	9	GVPPKVVSY	GVPPKVVSY	GVPPKVVSY	0.310932	0.41
HLA-A*02:03	98	1	9	9	KAFSMPLGV	KAFSMPLGV	KAFSMPLGV	0.309816	0.48
HLA-A*02:03	45	1	9	9	FQLNDTIHL	FQLNDTIHL	FQLNDTIHL	0.309373	0.48
HLA-A*23:01	12	1	9	9	FFVWVIILF	FFVWVIILF	FFVWVIILF	0.308996	0.29
HLA-B*35:01	96	1	9	9	GPTTEAPTL	GPTTEAPTL	GPTTEAPTL	0.307371	0.41
HLA-B*40:01	183	1	9	9	QESTSNGLI	QESTSNGLI	QESTSNGLI	0.306769	0.46
HLA-A*68:01	171	1	9	9	TQALQLFLR	TQALQLFLR	TQALQLFLR	0.306569	1.2
HLA-B*44:02	115	1	9	9	QEQHNAAGI	QEQHNAAGI	QEQHNAAGI	0.30455	0.35
HLA-A*68:01	180	1	9	9	FLRATTELR	FLRATTELR	FLRATTELR	0.302583	1.2
HLA-B*44:03	14	1	9	9	AENCYNLEI	AENCYNLEI	AENCYNLEI	0.301613	0.41
HLA-B*35:01	5	1	9	9	YYATSYLEY	YYATSYLEY	YYATSYLEY	0.298995	0.42
HLA-B*44:02	14	1	9	9	AENCYNLEI	AENCYNLEI	AENCYNLEI	0.298932	0.36
HLA-A*02:01	141	1	9	9	GITGIIIAI	GITGIIIAI	GITGIIIAI	0.298832	0.55
HLA-B*58:01	18	1	9	9	KSSFFVWVI	KSSFFVWVI	KSSFFVWVI	0.29797	0.55
HLA-B*44:03	25	1	9	9	AEGVIAFLI	AEGVIAFLI	AEGVIAFLI	0.297261	0.41
HLA-A*32:01	18	1	9	9	KSSFFVWVI	KSSFFVWVI	KSSFFVWVI	0.296422	0.25
HLA-B*57:01	64	1	9	9	AGIAWIPYF	AGIAWIPYF	AGIAWIPYF	0.296088	0.94
HLA-A*26:01	2	1	9	9	TSSYYATSY	TSSYYATSY	TSSYYATSY	0.293261	0.26
HLA-B*53:01	130	1	9	9	NINADIGEW	NINADIGEW	NINADIGEW	0.288291	0.3
HLA-B*44:03	115	1	9	9	QEQHNAAGI	QEQHNAAGI	QEQHNAAGI	0.288088	0.42
HLA-A*02:06	59	1	9	9	FAEGVIAFL	FAEGVIAFL	FAEGVIAFL	0.287202	0.6
HLA-B*44:03	10	1	9	9	AEGIYTEGL	AEGIYTEGL	AEGIYTEGL	0.287157	0.42
HLA-A*02:01	98	1	9	9	KAFSMPLGV	KAFSMPLGV	KAFSMPLGV	0.286687	0.57
HLA-A*26:01	143	1	9	9	TVTGILGSL	TVTGILGSL	TVTGILGSL	0.285577	0.26
HLA-A*68:02	59	1	9	9	FAEGVIAFL	FAEGVIAFL	FAEGVIAFL	0.282886	0.46
HLA-B*15:01	2	1	9	9	TSSYYATSY	TSSYYATSY	TSSYYATSY	0.282585	0.68
HLA-B*51:01	46	1	9	9	DTIHLHQQL	DTIHLHQQL	DTIHLHQQL	0.281374	0.5
HLA-A*30:02	179	1	9	9	NYTENTSSY	NYTENTSSY	NYTENTSSY	0.277822	0.5
HLA-B*44:02	25	1	9	9	AEGVIAFLI	AEGVIAFLI	AEGVIAFLI	0.277101	0.38
HLA-B*58:01	28	1	9	9	ITDKINQII	ITDKINQII	ITDKINQII	0.276418	0.58
HLA-A*01:01	93	1	9	9	STDIPSATK	STDIPSATK	STDIPSATK	0.274186	0.42
HLA-A*31:01	85	1	9	9	GILGSLGLR	GILGSLGLR	GILGSLGLR	0.271544	0.87
HLA-A*30:02	170	1	9	9	QLNDTIHLH	QLNDTIHLH	QLNDTIHLH	0.271192	0.52
HLA-B*15:01	125	1	9	9	GAQHSTTLF	GAQHSTTLF	GAQHSTTLF	0.269392	0.71
HLA-B*08:01	168	1	9	9	QLKSVGLNL	QLKSVGLNL	QLKSVGLNL	0.267636	0.41
HLA-B*07:02	48	1	9	9	LANETTQAL	LANETTQAL	LANETTQAL	0.267227	0.53
HLA-A*33:01	171	1	9	9	TQALQLFLR	TQALQLFLR	TQALQLFLR	0.26645	0.5
HLA-A*30:02	44	1	9	9	KINQIIHDF	KINQIIHDF	KINQIIHDF	0.265723	0.54
HLA-B*57:01	75	1	9	9	ITTAVKTVL	ITTAVKTVL	ITTAVKTVL	0.264984	1.1
HLA-A*02:06	52	1	9	9	IIIAIIALL	IIIAIIALL	IIIAIIALL	0.264658	0.67
HLA-B*35:01	132	1	9	9	RATTELRTY	RATTELRTY	RATTELRTY	0.262616	0.48
HLA-B*57:01	126	1	9	9	HTPQFLFQL	HTPQFLFQL	HTPQFLFQL	0.262323	1.1
HLA-B*44:02	10	1	9	9	AEGIYTEGL	AEGIYTEGL	AEGIYTEGL	0.260755	0.4
HLA-A*02:06	142	1	9	9	HIPEGETTL	HIPEGETTL	HIPEGETTL	0.26033	0.68
HLA-A*68:02	113	1	9	9	TTQALQLFL	TTQALQLFL	TTQALQLFL	0.258292	0.52
HLA-A*02:03	141	1	9	9	GITGIIIAI	GITGIIIAI	GITGIIIAI	0.258181	0.6
HLA-A*03:01	82	1	9	9	GVPPKVVSY	GVPPKVVSY	GVPPKVVSY	0.258001	0.76
HLA-A*01:01	13	1	9	9	GTGPCPGDY	GTGPCPGDY	GTGPCPGDY	0.255963	0.44
HLA-B*08:01	61	1	9	9	ILNRKAIDF	ILNRKAIDF	ILNRKAIDF	0.254893	0.43
HLA-B*40:01	25	1	9	9	AEGVIAFLI	AEGVIAFLI	AEGVIAFLI	0.253646	0.54
HLA-B*51:01	98	1	9	9	KAFSMPLGV	KAFSMPLGV	KAFSMPLGV	0.252875	0.57
HLA-A*30:01	105	1	9	9	SSYYATSYL	SSYYATSYL	SSYYATSYL	0.251339	0.56
HLA-B*53:01	38	1	9	9	YAFHKDGAF	YAFHKDGAF	YAFHKDGAF	0.249755	0.35
HLA-A*33:01	24	1	9	9	RLASTVIYR	RLASTVIYR	RLASTVIYR	0.247858	0.55
HLA-A*30:01	98	1	9	9	KAFSMPLGV	KAFSMPLGV	KAFSMPLGV	0.246396	0.57
HLA-A*68:02	166	1	9	9	TTGRLIWTL	TTGRLIWTL	TTGRLIWTL	0.246104	0.54
HLA-B*15:01	58	1	9	9	VIILFQKAF	VIILFQKAF	VIILFQKAF	0.244631	0.78
HLA-B*15:01	176	1	9	9	LLQLPRDKF	LLQLPRDKF	LLQLPRDKF	0.242245	0.79
HLA-B*08:01	48	1	9	9	LANETTQAL	LANETTQAL	LANETTQAL	0.241867	0.46
HLA-B*15:01	168	1	9	9	QLKSVGLNL	QLKSVGLNL	QLKSVGLNL	0.241631	0.8
HLA-A*02:01	52	1	9	9	IIIAIIALL	IIIAIIALL	IIIAIIALL	0.240648	0.66
HLA-A*68:02	123	1	9	9	VVTNSTLEV	VVTNSTLEV	VVTNSTLEV	0.239124	0.56
HLA-B*57:01	130	1	9	9	NINADIGEW	NINADIGEW	NINADIGEW	0.238673	1.2
HLA-A*24:02	120	1	9	9	LFLRATTEL	LFLRATTEL	LFLRATTEL	0.236183	0.42
HLA-A*11:01	41	1	9	9	RSRRQTNTK	RSRRQTNTK	RSRRQTNTK	0.235876	0.78
HLA-A*26:01	126	1	9	9	HTPQFLFQL	HTPQFLFQL	HTPQFLFQL	0.23566	0.31
HLA-A*32:01	166	1	9	9	TTGRLIWTL	TTGRLIWTL	TTGRLIWTL	0.23245	0.33
HLA-B*51:01	47	1	9	9	RPHTPQFLF	RPHTPQFLF	RPHTPQFLF	0.232027	0.62
HLA-A*02:06	26	1	9	9	FQKAFSMPL	FQKAFSMPL	FQKAFSMPL	0.230013	0.76
HLA-B*57:01	47	1	9	9	RPHTPQFLF	RPHTPQFLF	RPHTPQFLF	0.229543	1.2
HLA-A*31:01	23	1	9	9	RISDRATRK	RISDRATRK	RISDRATRK	0.228648	1.1
HLA-A*01:01	82	1	9	9	GVPPKVVSY	GVPPKVVSY	GVPPKVVSY	0.22769	0.5
HLA-B*57:01	113	1	9	9	TTQALQLFL	TTQALQLFL	TTQALQLFL	0.226236	1.2
HLA-A*03:01	129	1	9	9	KIDNNTFVR	KIDNNTFVR	KIDNNTFVR	0.225858	0.86
HLA-B*58:01	125	1	9	9	GAQHSTTLF	GAQHSTTLF	GAQHSTTLF	0.225537	0.71
HLA-A*32:01	36	1	9	9	QLRGEELSF	QLRGEELSF	QLRGEELSF	0.225236	0.34
HLA-A*30:01	93	1	9	9	STDIPSATK	STDIPSATK	STDIPSATK	0.225198	0.65
HLA-B*40:01	115	1	9	9	QEQHNAAGI	QEQHNAAGI	QEQHNAAGI	0.224741	0.59
HLA-A*31:01	37	1	9	9	AQHSTTLFK	AQHSTTLFK	AQHSTTLFK	0.222872	1.1
HLA-B*51:01	112	1	9	9	ETFLQSPPI	ETFLQSPPI	ETFLQSPPI	0.222797	0.63
HLA-B*15:01	61	1	9	9	ILNRKAIDF	ILNRKAIDF	ILNRKAIDF	0.216078	0.88
HLA-B*57:01	28	1	9	9	ITDKINQII	ITDKINQII	ITDKINQII	0.215777	1.2
HLA-B*35:01	179	1	9	9	NYTENTSSY	NYTENTSSY	NYTENTSSY	0.215622	0.58
HLA-A*23:01	120	1	9	9	LFLRATTEL	LFLRATTEL	LFLRATTEL	0.215207	0.4
HLA-A*11:01	101	1	9	9	SLLQLPRDK	SLLQLPRDK	SLLQLPRDK	0.212979	0.85
HLA-B*53:01	96	1	9	9	GPTTEAPTL	GPTTEAPTL	GPTTEAPTL	0.211474	0.41
HLA-A*68:01	157	1	9	9	ITKGRISDR	ITKGRISDR	ITKGRISDR	0.209459	1.6
HLA-B*58:01	64	1	9	9	AGIAWIPYF	AGIAWIPYF	AGIAWIPYF	0.209251	0.75
HLA-B*58:01	75	1	9	9	ITTAVKTVL	ITTAVKTVL	ITTAVKTVL	0.207351	0.75
HLA-A*02:01	63	1	9	9	LMHNQNALV	LMHNQNALV	LMHNQNALV	0.206729	0.77
HLA-B*51:01	59	1	9	9	FAEGVIAFL	FAEGVIAFL	FAEGVIAFL	0.206447	0.68
HLA-B*53:01	48	1	9	9	LANETTQAL	LANETTQAL	LANETTQAL	0.204905	0.42
HLA-A*26:01	67	1	9	9	EVTEIDQLV	EVTEIDQLV	EVTEIDQLV	0.203563	0.37
HLA-A*24:02	12	1	9	9	FFVWVIILF	FFVWVIILF	FFVWVIILF	0.201864	0.49
HLA-B*58:01	47	1	9	9	RPHTPQFLF	RPHTPQFLF	RPHTPQFLF	0.201467	0.78
HLA-A*24:02	126	1	9	9	HTPQFLFQL	HTPQFLFQL	HTPQFLFQL	0.199741	0.49
HLA-A*24:02	119	1	9	9	QWIPAGIGI	QWIPAGIGI	QWIPAGIGI	0.199314	0.49
HLA-B*15:01	45	1	9	9	FQLNDTIHL	FQLNDTIHL	FQLNDTIHL	0.198443	0.95
HLA-B*15:01	1	1	9	9	YTENTSSYY	YTENTSSYY	YTENTSSYY	0.198063	0.96
HLA-B*44:03	20	1	9	9	TELRTYTIL	TELRTYTIL	TELRTYTIL	0.197646	0.57
HLA-A*11:01	32	1	9	9	HLASTDQLK	HLASTDQLK	HLASTDQLK	0.19563	0.9
HLA-A*68:02	142	1	9	9	HIPEGETTL	HIPEGETTL	HIPEGETTL	0.195236	0.67
HLA-B*58:01	130	1	9	9	NINADIGEW	NINADIGEW	NINADIGEW	0.194087	0.79
HLA-B*08:01	26	1	9	9	FQKAFSMPL	FQKAFSMPL	FQKAFSMPL	0.193181	0.61
HLA-A*32:01	60	1	9	9	TVIYRGVNF	TVIYRGVNF	TVIYRGVNF	0.192762	0.39
HLA-A*01:01	87	1	9	9	NADIGEWAF	NADIGEWAF	NADIGEWAF	0.192724	0.56
HLA-B*07:02	90	1	9	9	GPCPGDYAF	GPCPGDYAF	GPCPGDYAF	0.192649	0.7
HLA-A*24:02	179	1	9	9	NYTENTSSY	NYTENTSSY	NYTENTSSY	0.191675	0.52
HLA-A*26:01	38	1	9	9	YAFHKDGAF	YAFHKDGAF	YAFHKDGAF	0.191355	0.39
HLA-A*68:01	82	1	9	9	GVPPKVVSY	GVPPKVVSY	GVPPKVVSY	0.189841	1.7
HLA-A*02:06	48	1	9	9	LANETTQAL	LANETTQAL	LANETTQAL	0.187708	0.94
HLA-A*23:01	119	1	9	9	QWIPAGIGI	QWIPAGIGI	QWIPAGIGI	0.187098	0.45
HLA-B*58:01	113	1	9	9	TTQALQLFL	TTQALQLFL	TTQALQLFL	0.186913	0.82
HLA-A*02:03	123	1	9	9	VVTNSTLEV	VVTNSTLEV	VVTNSTLEV	0.18593	0.86
HLA-B*53:01	15	1	9	9	KCNPNLHYW	KCNPNLHYW	KCNPNLHYW	0.185506	0.46
HLA-A*31:01	102	1	9	9	GLSLLQLPR	GLSLLQLPR	GLSLLQLPR	0.18525	1.3
HLA-A*02:06	109	1	9	9	GLMHNQNAL	GLMHNQNAL	GLMHNQNAL	0.184642	0.96
HLA-A*01:01	11	1	9	9	HKDGAFFLY	HKDGAFFLY	HKDGAFFLY	0.183037	0.58
HLA-B*53:01	9	1	9	9	ETTQALQLF	ETTQALQLF	ETTQALQLF	0.180822	0.48
HLA-A*23:01	126	1	9	9	HTPQFLFQL	HTPQFLFQL	HTPQFLFQL	0.179106	0.47
HLA-A*02:03	134	1	9	9	TTPENITTA	TTPENITTA	TTPENITTA	0.178048	0.9
HLA-A*32:01	126	1	9	9	HTPQFLFQL	HTPQFLFQL	HTPQFLFQL	0.17771	0.43
HLA-B*44:03	183	1	9	9	QESTSNGLI	QESTSNGLI	QESTSNGLI	0.177693	0.61
HLA-B*51:01	55	1	9	9	FGAQHSTTL	FGAQHSTTL	FGAQHSTTL	0.177454	0.79
HLA-B*44:02	183	1	9	9	QESTSNGLI	QESTSNGLI	QESTSNGLI	0.176946	0.53
HLA-B*53:01	27	1	9	9	VVSYEAGEW	VVSYEAGEW	VVSYEAGEW	0.176502	0.49
HLA-B*57:01	82	1	9	9	GVPPKVVSY	GVPPKVVSY	GVPPKVVSY	0.17583	1.4
HLA-B*57:01	125	1	9	9	GAQHSTTLF	GAQHSTTLF	GAQHSTTLF	0.175175	1.4
HLA-A*30:01	82	1	9	9	GVPPKVVSY	GVPPKVVSY	GVPPKVVSY	0.173376	0.89
HLA-A*26:01	65	1	9	9	NFAEGVIAF	NFAEGVIAF	NFAEGVIAF	0.171932	0.43
HLA-A*02:03	26	1	9	9	FQKAFSMPL	FQKAFSMPL	FQKAFSMPL	0.170363	0.93
HLA-A*02:06	143	1	9	9	TVTGILGSL	TVTGILGSL	TVTGILGSL	0.169462	1.1
HLA-A*24:02	108	1	9	9	LYDRLASTV	LYDRLASTV	LYDRLASTV	0.167363	0.58
HLA-A*32:01	58	1	9	9	VIILFQKAF	VIILFQKAF	VIILFQKAF	0.167225	0.45
HLA-B*08:01	51	1	9	9	FLYDRLAST	FLYDRLAST	FLYDRLAST	0.164501	0.71
HLA-A*02:01	123	1	9	9	VVTNSTLEV	VVTNSTLEV	VVTNSTLEV	0.163503	0.97
HLA-A*02:03	52	1	9	9	IIIAIIALL	IIIAIIALL	IIIAIIALL	0.163194	0.96
HLA-B*58:01	2	1	9	9	TSSYYATSY	TSSYYATSY	TSSYYATSY	0.161241	0.92
HLA-B*57:01	2	1	9	9	TSSYYATSY	TSSYYATSY	TSSYYATSY	0.160788	1.5
HLA-B*51:01	96	1	9	9	GPTTEAPTL	GPTTEAPTL	GPTTEAPTL	0.160773	0.87
HLA-B*58:01	126	1	9	9	HTPQFLFQL	HTPQFLFQL	HTPQFLFQL	0.160376	0.92
HLA-A*32:01	98	1	9	9	KAFSMPLGV	KAFSMPLGV	KAFSMPLGV	0.16036	0.47
HLA-A*01:01	5	1	9	9	YYATSYLEY	YYATSYLEY	YYATSYLEY	0.159789	0.65
HLA-A*02:03	142	1	9	9	HIPEGETTL	HIPEGETTL	HIPEGETTL	0.15916	0.99
HLA-A*30:02	97	1	9	9	AAGIAWIPY	AAGIAWIPY	AAGIAWIPY	0.157238	0.89
HLA-B*40:01	45	1	9	9	FQLNDTIHL	FQLNDTIHL	FQLNDTIHL	0.156379	0.74
HLA-A*68:02	98	1	9	9	KAFSMPLGV	KAFSMPLGV	KAFSMPLGV	0.154172	0.82
HLA-A*68:01	1	1	9	9	YTENTSSYY	YTENTSSYY	YTENTSSYY	0.153747	2
HLA-A*03:01	85	1	9	9	GILGSLGLR	GILGSLGLR	GILGSLGLR	0.151887	1.2
HLA-A*26:01	179	1	9	9	NYTENTSSY	NYTENTSSY	NYTENTSSY	0.15066	0.49
HLA-A*01:01	28	1	9	9	ITDKINQII	ITDKINQII	ITDKINQII	0.149696	0.68
HLA-B*07:02	56	1	9	9	RPSSSQIPS	RPSSSQIPS	RPSSSQIPS	0.149592	0.85
HLA-A*32:01	105	1	9	9	SSYYATSYL	SSYYATSYL	SSYYATSYL	0.147756	0.51
HLA-B*51:01	38	1	9	9	YAFHKDGAF	YAFHKDGAF	YAFHKDGAF	0.147695	0.95
HLA-A*68:01	85	1	9	9	GILGSLGLR	GILGSLGLR	GILGSLGLR	0.147649	2.1
HLA-B*08:01	34	1	9	9	SEQLRGEEL	SEQLRGEEL	SEQLRGEEL	0.147447	0.79
HLA-A*02:01	142	1	9	9	HIPEGETTL	HIPEGETTL	HIPEGETTL	0.147274	1.1
HLA-A*02:06	28	1	9	9	ITDKINQII	ITDKINQII	ITDKINQII	0.145731	1.2
HLA-B*08:01	38	1	9	9	YAFHKDGAF	YAFHKDGAF	YAFHKDGAF	0.144835	0.81
HLA-A*68:02	52	1	9	9	IIIAIIALL	IIIAIIALL	IIIAIIALL	0.144589	0.86
HLA-A*02:06	145	1	9	9	FKIDNNTFV	FKIDNNTFV	FKIDNNTFV	0.143252	1.2
HLA-B*44:03	184	1	9	9	QHNAAGIAW	QHNAAGIAW	QHNAAGIAW	0.140506	0.68
HLA-B*08:01	46	1	9	9	DTIHLHQQL	DTIHLHQQL	DTIHLHQQL	0.140427	0.83
HLA-A*32:01	64	1	9	9	AGIAWIPYF	AGIAWIPYF	AGIAWIPYF	0.138958	0.55
HLA-A*02:06	114	1	9	9	SQIPSSSPT	SQIPSSSPT	SQIPSSSPT	0.138817	1.3
HLA-A*68:02	9	1	9	9	ETTQALQLF	ETTQALQLF	ETTQALQLF	0.137613	0.91
HLA-A*02:01	126	1	9	9	HTPQFLFQL	HTPQFLFQL	HTPQFLFQL	0.136684	1.1
HLA-B*57:01	98	1	9	9	KAFSMPLGV	KAFSMPLGV	KAFSMPLGV	0.135234	1.7
HLA-B*44:03	35	1	9	9	LEVTEIDQL	LEVTEIDQL	LEVTEIDQL	0.134809	0.7
HLA-A*03:01	102	1	9	9	GLSLLQLPR	GLSLLQLPR	GLSLLQLPR	0.134399	1.3
HLA-A*30:01	168	1	9	9	QLKSVGLNL	QLKSVGLNL	QLKSVGLNL	0.134043	1.2
HLA-A*26:01	5	1	9	9	YYATSYLEY	YYATSYLEY	YYATSYLEY	0.134021	0.54
HLA-A*68:02	48	1	9	9	LANETTQAL	LANETTQAL	LANETTQAL	0.133769	0.93
HLA-A*23:01	47	1	9	9	RPHTPQFLF	RPHTPQFLF	RPHTPQFLF	0.133159	0.61
HLA-B*15:01	48	1	9	9	LANETTQAL	LANETTQAL	LANETTQAL	0.132725	1.4
HLA-B*08:01	120	1	9	9	LFLRATTEL	LFLRATTEL	LFLRATTEL	0.132552	0.89
HLA-B*58:01	98	1	9	9	KAFSMPLGV	KAFSMPLGV	KAFSMPLGV	0.132387	1.1
HLA-A*32:01	61	1	9	9	ILNRKAIDF	ILNRKAIDF	ILNRKAIDF	0.131873	0.58
HLA-B*08:01	162	1	9	9	RATRKYSDL	RATRKYSDL	RATRKYSDL	0.130642	0.9
HLA-A*03:01	182	1	9	9	QLPRDKFRK	QLPRDKFRK	QLPRDKFRK	0.130032	1.3
HLA-B*44:02	20	1	9	9	TELRTYTIL	TELRTYTIL	TELRTYTIL	0.129409	0.63
HLA-B*44:02	184	1	9	9	QHNAAGIAW	QHNAAGIAW	QHNAAGIAW	0.128376	0.64
HLA-A*32:01	27	1	9	9	VVSYEAGEW	VVSYEAGEW	VVSYEAGEW	0.126001	0.61
HLA-A*24:02	15	1	9	9	KCNPNLHYW	KCNPNLHYW	KCNPNLHYW	0.125821	0.73
HLA-A*23:01	179	1	9	9	NYTENTSSY	NYTENTSSY	NYTENTSSY	0.125066	0.66
HLA-B*58:01	82	1	9	9	GVPPKVVSY	GVPPKVVSY	GVPPKVVSY	0.124131	1.1
HLA-A*02:06	166	1	9	9	TTGRLIWTL	TTGRLIWTL	TTGRLIWTL	0.123642	1.4
HLA-B*44:03	7	1	9	9	GEELSFEAL	GEELSFEAL	GEELSFEAL	0.123423	0.74
HLA-A*23:01	44	1	9	9	KINQIIHDF	KINQIIHDF	KINQIIHDF	0.122838	0.66
HLA-A*32:01	132	1	9	9	RATTELRTY	RATTELRTY	RATTELRTY	0.12253	0.62
HLA-B*57:01	150	1	9	9	FRKSSFFVW	FRKSSFFVW	FRKSSFFVW	0.122252	1.8
HLA-A*30:01	101	1	9	9	SLLQLPRDK	SLLQLPRDK	SLLQLPRDK	0.122097	1.4
HLA-A*23:01	15	1	9	9	KCNPNLHYW	KCNPNLHYW	KCNPNLHYW	0.121162	0.68
HLA-B*53:01	22	1	9	9	TPENITTAV	TPENITTAV	TPENITTAV	0.120428	0.65
HLA-B*35:01	59	1	9	9	FAEGVIAFL	FAEGVIAFL	FAEGVIAFL	0.11823	0.93
HLA-A*68:01	23	1	9	9	RISDRATRK	RISDRATRK	RISDRATRK	0.1182	2.3
HLA-A*68:01	2	1	9	9	TSSYYATSY	TSSYYATSY	TSSYYATSY	0.117792	2.3
HLA-A*24:02	44	1	9	9	KINQIIHDF	KINQIIHDF	KINQIIHDF	0.116935	0.77
HLA-A*68:02	75	1	9	9	ITTAVKTVL	ITTAVKTVL	ITTAVKTVL	0.116437	1.1
HLA-A*30:01	30	1	9	9	VIAFLILAK	VIAFLILAK	VIAFLILAK	0.116296	1.4
HLA-B*07:02	55	1	9	9	FGAQHSTTL	FGAQHSTTL	FGAQHSTTL	0.115433	1.1
HLA-A*02:03	158	1	9	9	LITSTVTGI	LITSTVTGI	LITSTVTGI	0.114817	1.3
HLA-A*11:01	85	1	9	9	GILGSLGLR	GILGSLGLR	GILGSLGLR	0.114624	1.3
HLA-B*35:01	9	1	9	9	ETTQALQLF	ETTQALQLF	ETTQALQLF	0.114552	0.95
HLA-A*68:01	129	1	9	9	KIDNNTFVR	KIDNNTFVR	KIDNNTFVR	0.114412	2.4
HLA-A*31:01	73	1	9	9	QTNTKATGK	QTNTKATGK	QTNTKATGK	0.112767	1.9
HLA-B*15:01	117	1	9	9	YLEYEIENF	YLEYEIENF	YLEYEIENF	0.11214	1.5
HLA-B*08:01	65	1	9	9	NFAEGVIAF	NFAEGVIAF	NFAEGVIAF	0.111976	1.1
HLA-B*35:01	3	1	9	9	ISDRATRKY	ISDRATRKY	ISDRATRKY	0.111366	0.97
HLA-A*68:02	163	1	9	9	YTILNRKAI	YTILNRKAI	YTILNRKAI	0.110762	1.1
HLA-A*32:01	168	1	9	9	QLKSVGLNL	QLKSVGLNL	QLKSVGLNL	0.110113	0.68
HLA-B*57:01	105	1	9	9	SSYYATSYL	SSYYATSYL	SSYYATSYL	0.109429	1.9
HLA-A*24:02	47	1	9	9	RPHTPQFLF	RPHTPQFLF	RPHTPQFLF	0.109061	0.81
HLA-B*08:01	60	1	9	9	TVIYRGVNF	TVIYRGVNF	TVIYRGVNF	0.107849	1.1
HLA-A*11:01	171	1	9	9	TQALQLFLR	TQALQLFLR	TQALQLFLR	0.107371	1.4
HLA-B*35:01	36	1	9	9	QLRGEELSF	QLRGEELSF	QLRGEELSF	0.107105	0.98
HLA-A*02:06	82	1	9	9	GVPPKVVSY	GVPPKVVSY	GVPPKVVSY	0.107033	1.6
HLA-A*11:01	182	1	9	9	QLPRDKFRK	QLPRDKFRK	QLPRDKFRK	0.105386	1.4
HLA-A*26:01	112	1	9	9	ETFLQSPPI	ETFLQSPPI	ETFLQSPPI	0.105177	0.66
HLA-A*02:01	168	1	9	9	QLKSVGLNL	QLKSVGLNL	QLKSVGLNL	0.105006	1.4
HLA-B*57:01	38	1	9	9	YAFHKDGAF	YAFHKDGAF	YAFHKDGAF	0.104684	1.9
HLA-A*02:06	144	1	9	9	GIIIAIIAL	GIIIAIIAL	GIIIAIIAL	0.103508	1.6
HLA-B*58:01	184	1	9	9	QHNAAGIAW	QHNAAGIAW	QHNAAGIAW	0.103184	1.3
HLA-A*68:02	146	1	9	9	TTELRTYTI	TTELRTYTI	TTELRTYTI	0.103086	1.2
HLA-B*15:01	170	1	9	9	QLNDTIHLH	QLNDTIHLH	QLNDTIHLH	0.102586	1.6
HLA-B*08:01	47	1	9	9	RPHTPQFLF	RPHTPQFLF	RPHTPQFLF	0.101754	1.2
HLA-A*26:01	54	1	9	9	ETITETAAT	ETITETAAT	ETITETAAT	0.101395	0.69
HLA-A*02:06	55	1	9	9	FGAQHSTTL	FGAQHSTTL	FGAQHSTTL	0.101356	1.6
HLA-B*51:01	67	1	9	9	EVTEIDQLV	EVTEIDQLV	EVTEIDQLV	0.101288	1.3
HLA-A*02:06	67	1	9	9	EVTEIDQLV	EVTEIDQLV	EVTEIDQLV	0.101135	1.6
HLA-B*15:01	5	1	9	9	YYATSYLEY	YYATSYLEY	YYATSYLEY	0.100572	1.6
HLA-B*44:02	7	1	9	9	GEELSFEAL	GEELSFEAL	GEELSFEAL	0.100231	0.72
HLA-A*30:01	157	1	9	9	ITKGRISDR	ITKGRISDR	ITKGRISDR	0.100049	1.6
HLA-B*15:01	84	1	9	9	AFHKDGAFF	AFHKDGAFF	AFHKDGAFF	0.099816	1.6
HLA-B*15:01	77	1	9	9	LFKIDNNTF	LFKIDNNTF	LFKIDNNTF	0.099143	1.6
HLA-A*68:02	141	1	9	9	GITGIIIAI	GITGIIIAI	GITGIIIAI	0.0988	1.2
HLA-B*15:01	65	1	9	9	NFAEGVIAF	NFAEGVIAF	NFAEGVIAF	0.098633	1.6
HLA-B*08:01	146	1	9	9	TTELRTYTI	TTELRTYTI	TTELRTYTI	0.097735	1.2
HLA-A*68:01	46	1	9	9	DTIHLHQQL	DTIHLHQQL	DTIHLHQQL	0.097351	2.6
HLA-A*01:01	9	1	9	9	ETTQALQLF	ETTQALQLF	ETTQALQLF	0.096082	0.97
HLA-A*32:01	47	1	9	9	RPHTPQFLF	RPHTPQFLF	RPHTPQFLF	0.095815	0.76
HLA-A*68:02	131	1	9	9	ITSTVTGIL	ITSTVTGIL	ITSTVTGIL	0.095673	1.3
HLA-A*30:02	17	1	9	9	RTYTILNRK	RTYTILNRK	RTYTILNRK	0.094853	1.4
HLA-B*58:01	1	1	9	9	YTENTSSYY	YTENTSSYY	YTENTSSYY	0.09455	1.3
HLA-A*30:02	36	1	9	9	QLRGEELSF	QLRGEELSF	QLRGEELSF	0.092268	1.4
HLA-B*08:01	66	1	9	9	ILAKPKETF	ILAKPKETF	ILAKPKETF	0.091832	1.3
HLA-B*51:01	105	1	9	9	SSYYATSYL	SSYYATSYL	SSYYATSYL	0.091671	1.4
HLA-A*11:01	170	1	9	9	QLNDTIHLH	QLNDTIHLH	QLNDTIHLH	0.090809	1.5
HLA-B*15:01	3	1	9	9	ISDRATRKY	ISDRATRKY	ISDRATRKY	0.089705	1.7
HLA-A*02:03	143	1	9	9	TVTGILGSL	TVTGILGSL	TVTGILGSL	0.089375	1.6
HLA-A*23:01	108	1	9	9	LYDRLASTV	LYDRLASTV	LYDRLASTV	0.089294	0.87
HLA-B*08:01	36	1	9	9	QLRGEELSF	QLRGEELSF	QLRGEELSF	0.089197	1.3
HLA-B*08:01	77	1	9	9	LFKIDNNTF	LFKIDNNTF	LFKIDNNTF	0.088709	1.3
HLA-A*01:01	132	1	9	9	RATTELRTY	RATTELRTY	RATTELRTY	0.088415	1.1
HLA-A*23:01	64	1	9	9	AGIAWIPYF	AGIAWIPYF	AGIAWIPYF	0.088385	0.87
HLA-A*31:01	170	1	9	9	QLNDTIHLH	QLNDTIHLH	QLNDTIHLH	0.088362	2.2
HLA-B*35:01	11	1	9	9	HKDGAFFLY	HKDGAFFLY	HKDGAFFLY	0.088328	1.2
HLA-A*24:02	69	1	9	9	EWAENCYNL	EWAENCYNL	EWAENCYNL	0.088107	0.92
HLA-B*07:02	177	1	9	9	LPRDKFRKS	LPRDKFRKS	LPRDKFRKS	0.08806	1.3
HLA-A*23:01	40	1	9	9	SFFVWVIIL	SFFVWVIIL	SFFVWVIIL	0.087415	0.88
HLA-B*35:01	60	1	9	9	TVIYRGVNF	TVIYRGVNF	TVIYRGVNF	0.087266	1.2
HLA-B*58:01	38	1	9	9	YAFHKDGAF	YAFHKDGAF	YAFHKDGAF	0.086836	1.4
HLA-A*26:01	134	1	9	9	TTPENITTA	TTPENITTA	TTPENITTA	0.085709	0.79
HLA-B*51:01	28	1	9	9	ITDKINQII	ITDKINQII	ITDKINQII	0.08515	1.5
HLA-B*53:01	184	1	9	9	QHNAAGIAW	QHNAAGIAW	QHNAAGIAW	0.085059	0.87
HLA-A*31:01	81	1	9	9	VWVIILFQK	VWVIILFQK	VWVIILFQK	0.084762	2.3
HLA-B*57:01	58	1	9	9	VIILFQKAF	VIILFQKAF	VIILFQKAF	0.084233	2.2
HLA-B*57:01	36	1	9	9	QLRGEELSF	QLRGEELSF	QLRGEELSF	0.084159	2.2
HLA-B*44:02	15	1	9	9	KCNPNLHYW	KCNPNLHYW	KCNPNLHYW	0.083956	0.79
HLA-A*30:02	105	1	9	9	SSYYATSYL	SSYYATSYL	SSYYATSYL	0.082704	1.6
HLA-A*02:03	100	1	9	9	HMQISTIGI	HMQISTIGI	HMQISTIGI	0.082609	1.7
HLA-B*58:01	105	1	9	9	SSYYATSYL	SSYYATSYL	SSYYATSYL	0.082497	1.4
HLA-B*53:01	1	1	9	9	YTENTSSYY	YTENTSSYY	YTENTSSYY	0.082257	0.89
HLA-B*51:01	146	1	9	9	TTELRTYTI	TTELRTYTI	TTELRTYTI	0.081904	1.6
HLA-A*02:06	66	1	9	9	ILAKPKETF	ILAKPKETF	ILAKPKETF	0.081895	1.9
HLA-A*01:01	117	1	9	9	YLEYEIENF	YLEYEIENF	YLEYEIENF	0.081787	1.1
HLA-A*30:02	66	1	9	9	ILAKPKETF	ILAKPKETF	ILAKPKETF	0.081628	1.6
HLA-A*02:01	134	1	9	9	TTPENITTA	TTPENITTA	TTPENITTA	0.081302	1.6
HLA-A*30:02	15	1	9	9	KCNPNLHYW	KCNPNLHYW	KCNPNLHYW	0.080905	1.6
HLA-B*08:01	177	1	9	9	LPRDKFRKS	LPRDKFRKS	LPRDKFRKS	0.080562	1.5
HLA-B*51:01	126	1	9	9	HTPQFLFQL	HTPQFLFQL	HTPQFLFQL	0.079982	1.6
HLA-B*53:01	132	1	9	9	RATTELRTY	RATTELRTY	RATTELRTY	0.079516	0.91
HLA-A*02:01	59	1	9	9	FAEGVIAFL	FAEGVIAFL	FAEGVIAFL	0.079243	1.6
HLA-A*30:01	118	1	9	9	KNSPGMVPL	KNSPGMVPL	KNSPGMVPL	0.078939	2
HLA-B*08:01	108	1	9	9	LYDRLASTV	LYDRLASTV	LYDRLASTV	0.077379	1.5
HLA-B*53:01	59	1	9	9	FAEGVIAFL	FAEGVIAFL	FAEGVIAFL	0.076259	0.94
HLA-B*58:01	150	1	9	9	FRKSSFFVW	FRKSSFFVW	FRKSSFFVW	0.076117	1.5
HLA-A*30:02	98	1	9	9	KAFSMPLGV	KAFSMPLGV	KAFSMPLGV	0.075632	1.7
HLA-B*35:01	46	1	9	9	DTIHLHQQL	DTIHLHQQL	DTIHLHQQL	0.075467	1.3
HLA-A*68:01	70	1	9	9	ETAATIIGT	ETAATIIGT	ETAATIIGT	0.074711	2.9
HLA-B*44:02	35	1	9	9	LEVTEIDQL	LEVTEIDQL	LEVTEIDQL	0.074689	0.86
HLA-B*53:01	65	1	9	9	NFAEGVIAF	NFAEGVIAF	NFAEGVIAF	0.074627	0.96
HLA-A*30:02	37	1	9	9	AQHSTTLFK	AQHSTTLFK	AQHSTTLFK	0.074217	1.7
HLA-B*08:01	142	1	9	9	HIPEGETTL	HIPEGETTL	HIPEGETTL	0.074098	1.6
HLA-A*68:01	170	1	9	9	QLNDTIHLH	QLNDTIHLH	QLNDTIHLH	0.073919	2.9
HLA-A*02:06	44	1	9	9	KINQIIHDF	KINQIIHDF	KINQIIHDF	0.073348	2.1
HLA-A*30:02	83	1	9	9	ILFQKAFSM	ILFQKAFSM	ILFQKAFSM	0.07328	1.7
HLA-B*51:01	87	1	9	9	NADIGEWAF	NADIGEWAF	NADIGEWAF	0.073121	1.7
HLA-A*02:06	168	1	9	9	QLKSVGLNL	QLKSVGLNL	QLKSVGLNL	0.072908	2.1
HLA-A*02:03	66	1	9	9	ILAKPKETF	ILAKPKETF	ILAKPKETF	0.072743	1.9
HLA-A*30:02	84	1	9	9	AFHKDGAFF	AFHKDGAFF	AFHKDGAFF	0.072663	1.7
HLA-B*08:01	109	1	9	9	GLMHNQNAL	GLMHNQNAL	GLMHNQNAL	0.072351	1.6
HLA-A*11:01	2	1	9	9	TSSYYATSY	TSSYYATSY	TSSYYATSY	0.071854	1.7
HLA-A*11:01	174	1	9	9	GIYTEGLMH	GIYTEGLMH	GIYTEGLMH	0.071248	1.7
HLA-B*57:01	184	1	9	9	QHNAAGIAW	QHNAAGIAW	QHNAAGIAW	0.070791	2.4
HLA-A*02:06	158	1	9	9	LITSTVTGI	LITSTVTGI	LITSTVTGI	0.070789	2.1
HLA-A*32:01	17	1	9	9	RTYTILNRK	RTYTILNRK	RTYTILNRK	0.070236	0.99
HLA-B*53:01	31	1	9	9	IPSSSPTTA	IPSSSPTTA	IPSSSPTTA	0.069913	1.1
HLA-B*53:01	46	1	9	9	DTIHLHQQL	DTIHLHQQL	DTIHLHQQL	0.069855	1.1
HLA-A*68:01	9	1	9	9	ETTQALQLF	ETTQALQLF	ETTQALQLF	0.069687	3
HLA-A*30:01	19	1	9	9	ILGSLGLRK	ILGSLGLRK	ILGSLGLRK	0.06934	2.2
HLA-A*26:01	53	1	9	9	LVPKNSPGM	LVPKNSPGM	LVPKNSPGM	0.069189	0.94
HLA-B*57:01	131	1	9	9	ITSTVTGIL	ITSTVTGIL	ITSTVTGIL	0.068889	2.4
HLA-A*26:01	130	1	9	9	NINADIGEW	NINADIGEW	NINADIGEW	0.068271	0.95
HLA-B*35:01	125	1	9	9	GAQHSTTLF	GAQHSTTLF	GAQHSTTLF	0.067904	1.4
HLA-A*31:01	82	1	9	9	GVPPKVVSY	GVPPKVVSY	GVPPKVVSY	0.067794	2.6
HLA-A*23:01	150	1	9	9	FRKSSFFVW	FRKSSFFVW	FRKSSFFVW	0.067186	1.1
HLA-A*02:06	160	1	9	9	NQNALVCGL	NQNALVCGL	NQNALVCGL	0.066949	2.2
HLA-A*26:01	170	1	9	9	QLNDTIHLH	QLNDTIHLH	QLNDTIHLH	0.066929	0.98
HLA-B*35:01	55	1	9	9	FGAQHSTTL	FGAQHSTTL	FGAQHSTTL	0.066827	1.4
HLA-A*68:01	37	1	9	9	AQHSTTLFK	AQHSTTLFK	AQHSTTLFK	0.066805	3.1
HLA-B*35:01	66	1	9	9	ILAKPKETF	ILAKPKETF	ILAKPKETF	0.066737	1.4
HLA-B*57:01	60	1	9	9	TVIYRGVNF	TVIYRGVNF	TVIYRGVNF	0.06633	2.5
HLA-B*08:01	72	1	9	9	SPGMVPLHI	SPGMVPLHI	SPGMVPLHI	0.066111	1.7
HLA-A*30:01	132	1	9	9	RATTELRTY	RATTELRTY	RATTELRTY	0.065642	2.3
HLA-A*31:01	93	1	9	9	STDIPSATK	STDIPSATK	STDIPSATK	0.065638	2.7
HLA-B*57:01	46	1	9	9	DTIHLHQQL	DTIHLHQQL	DTIHLHQQL	0.064785	2.5
HLA-B*53:01	5	1	9	9	YYATSYLEY	YYATSYLEY	YYATSYLEY	0.064687	1.1
HLA-A*02:03	48	1	9	9	LANETTQAL	LANETTQAL	LANETTQAL	0.064302	2
HLA-A*30:02	64	1	9	9	AGIAWIPYF	AGIAWIPYF	AGIAWIPYF	0.064224	1.9
HLA-A*02:03	126	1	9	9	HTPQFLFQL	HTPQFLFQL	HTPQFLFQL	0.064118	2
HLA-A*01:01	170	1	9	9	QLNDTIHLH	QLNDTIHLH	QLNDTIHLH	0.064073	1.3
HLA-B*35:01	142	1	9	9	HIPEGETTL	HIPEGETTL	HIPEGETTL	0.064044	1.4
HLA-A*02:06	113	1	9	9	TTQALQLFL	TTQALQLFL	TTQALQLFL	0.063993	2.3
HLA-A*02:06	105	1	9	9	SSYYATSYL	SSYYATSYL	SSYYATSYL	0.063948	2.3
HLA-A*68:01	126	1	9	9	HTPQFLFQL	HTPQFLFQL	HTPQFLFQL	0.063607	3.2
HLA-A*30:02	125	1	9	9	GAQHSTTLF	GAQHSTTLF	GAQHSTTLF	0.063589	1.9
HLA-A*02:01	26	1	9	9	FQKAFSMPL	FQKAFSMPL	FQKAFSMPL	0.063434	1.8
HLA-A*32:01	52	1	9	9	IIIAIIALL	IIIAIIALL	IIIAIIALL	0.063294	1.1
HLA-B*15:01	109	1	9	9	GLMHNQNAL	GLMHNQNAL	GLMHNQNAL	0.063178	2.2
HLA-B*08:01	163	1	9	9	YTILNRKAI	YTILNRKAI	YTILNRKAI	0.062856	1.8
HLA-A*32:01	113	1	9	9	TTQALQLFL	TTQALQLFL	TTQALQLFL	0.062392	1.2
HLA-B*35:01	83	1	9	9	ILFQKAFSM	ILFQKAFSM	ILFQKAFSM	0.062231	1.4
HLA-A*23:01	83	1	9	9	ILFQKAFSM	ILFQKAFSM	ILFQKAFSM	0.062217	1.1
HLA-B*08:01	87	1	9	9	NADIGEWAF	NADIGEWAF	NADIGEWAF	0.062167	1.8
HLA-A*26:01	36	1	9	9	QLRGEELSF	QLRGEELSF	QLRGEELSF	0.062155	1.1
HLA-A*30:01	32	1	9	9	HLASTDQLK	HLASTDQLK	HLASTDQLK	0.061924	2.5
HLA-A*26:01	11	1	9	9	HKDGAFFLY	HKDGAFFLY	HKDGAFFLY	0.061844	1.1
HLA-A*02:06	53	1	9	9	LVPKNSPGM	LVPKNSPGM	LVPKNSPGM	0.061733	2.4
HLA-B*08:01	22	1	9	9	TPENITTAV	TPENITTAV	TPENITTAV	0.061172	1.8
HLA-B*15:01	97	1	9	9	AAGIAWIPY	AAGIAWIPY	AAGIAWIPY	0.061116	2.2
HLA-A*11:01	102	1	9	9	GLSLLQLPR	GLSLLQLPR	GLSLLQLPR	0.060867	1.9
HLA-A*23:01	69	1	9	9	EWAENCYNL	EWAENCYNL	EWAENCYNL	0.060858	1.2
HLA-A*32:01	24	1	9	9	RLASTVIYR	RLASTVIYR	RLASTVIYR	0.060769	1.2
HLA-B*35:01	175	1	9	9	LPSQNSTEG	LPSQNSTEG	LPSQNSTEG	0.060727	1.4
HLA-B*57:01	1	1	9	9	YTENTSSYY	YTENTSSYY	YTENTSSYY	0.060637	2.6
HLA-A*26:01	70	1	9	9	ETAATIIGT	ETAATIIGT	ETAATIIGT	0.0602	1.1
HLA-A*02:03	55	1	9	9	FGAQHSTTL	FGAQHSTTL	FGAQHSTTL	0.060194	2.1
HLA-A*30:01	18	1	9	9	KSSFFVWVI	KSSFFVWVI	KSSFFVWVI	0.059677	2.5
HLA-A*32:01	150	1	9	9	FRKSSFFVW	FRKSSFFVW	FRKSSFFVW	0.058983	1.2
HLA-A*30:02	174	1	9	9	GIYTEGLMH	GIYTEGLMH	GIYTEGLMH	0.058855	2
HLA-B*08:01	82	1	9	9	GVPPKVVSY	GVPPKVVSY	GVPPKVVSY	0.058248	1.9
HLA-A*32:01	176	1	9	9	LLQLPRDKF	LLQLPRDKF	LLQLPRDKF	0.058104	1.2
HLA-B*07:02	104	1	9	9	IPYFGPGAE	IPYFGPGAE	IPYFGPGAE	0.0581	1.6
HLA-A*26:01	142	1	9	9	HIPEGETTL	HIPEGETTL	HIPEGETTL	0.057893	1.1
HLA-A*02:03	145	1	9	9	FKIDNNTFV	FKIDNNTFV	FKIDNNTFV	0.057743	2.1
HLA-A*02:06	63	1	9	9	LMHNQNALV	LMHNQNALV	LMHNQNALV	0.057718	2.5
HLA-B*07:02	168	1	9	9	QLKSVGLNL	QLKSVGLNL	QLKSVGLNL	0.057627	1.6
HLA-A*68:01	60	1	9	9	TVIYRGVNF	TVIYRGVNF	TVIYRGVNF	0.056781	3.3
HLA-A*33:01	46	1	9	9	DTIHLHQQL	DTIHLHQQL	DTIHLHQQL	0.056591	2.1
HLA-B*53:01	66	1	9	9	ILAKPKETF	ILAKPKETF	ILAKPKETF	0.056078	1.2
HLA-A*23:01	60	1	9	9	TVIYRGVNF	TVIYRGVNF	TVIYRGVNF	0.056005	1.2
HLA-B*35:01	97	1	9	9	AAGIAWIPY	AAGIAWIPY	AAGIAWIPY	0.055535	1.5
HLA-A*26:01	44	1	9	9	KINQIIHDF	KINQIIHDF	KINQIIHDF	0.055281	1.1
HLA-B*08:01	39	1	9	9	VPKNSPGMV	VPKNSPGMV	VPKNSPGMV	0.055009	1.9
HLA-A*02:01	144	1	9	9	GIIIAIIAL	GIIIAIIAL	GIIIAIIAL	0.054861	2
HLA-B*58:01	131	1	9	9	ITSTVTGIL	ITSTVTGIL	ITSTVTGIL	0.054636	1.8
HLA-B*15:01	11	1	9	9	HKDGAFFLY	HKDGAFFLY	HKDGAFFLY	0.054607	2.3
HLA-B*44:03	15	1	9	9	KCNPNLHYW	KCNPNLHYW	KCNPNLHYW	0.054485	1.2
HLA-B*58:01	48	1	9	9	LANETTQAL	LANETTQAL	LANETTQAL	0.054459	1.8
HLA-A*24:02	9	1	9	9	ETTQALQLF	ETTQALQLF	ETTQALQLF	0.054441	1.3
HLA-A*03:01	180	1	9	9	FLRATTELR	FLRATTELR	FLRATTELR	0.053386	2.1
HLA-A*23:01	4	1	9	9	FHKDGAFFL	FHKDGAFFL	FHKDGAFFL	0.053281	1.3
HLA-B*51:01	163	1	9	9	YTILNRKAI	YTILNRKAI	YTILNRKAI	0.052441	2.2
HLA-A*30:01	129	1	9	9	KIDNNTFVR	KIDNNTFVR	KIDNNTFVR	0.052063	2.8
HLA-A*01:01	146	1	9	9	TTELRTYTI	TTELRTYTI	TTELRTYTI	0.052052	1.5
HLA-B*07:02	75	1	9	9	ITTAVKTVL	ITTAVKTVL	ITTAVKTVL	0.052045	1.7
HLA-A*02:06	124	1	9	9	LIWTLDANI	LIWTLDANI	LIWTLDANI	0.051971	2.6
HLA-A*33:01	17	1	9	9	RTYTILNRK	RTYTILNRK	RTYTILNRK	0.051902	2.2
HLA-A*30:02	41	1	9	9	RSRRQTNTK	RSRRQTNTK	RSRRQTNTK	0.051756	2.2
HLA-A*30:02	60	1	9	9	TVIYRGVNF	TVIYRGVNF	TVIYRGVNF	0.051518	2.2
HLA-B*51:01	123	1	9	9	VVTNSTLEV	VVTNSTLEV	VVTNSTLEV	0.05143	2.2
HLA-B*15:01	64	1	9	9	AGIAWIPYF	AGIAWIPYF	AGIAWIPYF	0.05139	2.4
HLA-A*30:01	44	1	9	9	KINQIIHDF	KINQIIHDF	KINQIIHDF	0.050551	2.9
HLA-B*35:01	104	1	9	9	IPYFGPGAE	IPYFGPGAE	IPYFGPGAE	0.050525	1.6
HLA-A*02:01	66	1	9	9	ILAKPKETF	ILAKPKETF	ILAKPKETF	0.050374	2.1
HLA-A*03:01	71	1	9	9	IIALLCVCK	IIALLCVCK	IIALLCVCK	0.05034	2.2
HLA-A*26:01	132	1	9	9	RATTELRTY	RATTELRTY	RATTELRTY	0.049841	1.2
HLA-A*24:02	64	1	9	9	AGIAWIPYF	AGIAWIPYF	AGIAWIPYF	0.049617	1.4
HLA-B*15:01	105	1	9	9	SSYYATSYL	SSYYATSYL	SSYYATSYL	0.049483	2.5
HLA-B*07:02	143	1	9	9	TVTGILGSL	TVTGILGSL	TVTGILGSL	0.049462	1.7
HLA-A*24:02	166	1	9	9	TTGRLIWTL	TTGRLIWTL	TTGRLIWTL	0.049093	1.4
HLA-A*02:01	124	1	9	9	LIWTLDANI	LIWTLDANI	LIWTLDANI	0.048948	2.1
HLA-A*11:01	71	1	9	9	IIALLCVCK	IIALLCVCK	IIALLCVCK	0.048805	2.1
HLA-A*24:02	4	1	9	9	FHKDGAFFL	FHKDGAFFL	FHKDGAFFL	0.048741	1.4
HLA-A*32:01	141	1	9	9	GITGIIIAI	GITGIIIAI	GITGIIIAI	0.047922	1.4
HLA-A*30:02	140	1	9	9	KFRKSSFFV	KFRKSSFFV	KFRKSSFFV	0.047822	2.3
HLA-B*15:01	142	1	9	9	HIPEGETTL	HIPEGETTL	HIPEGETTL	0.047764	2.5
HLA-A*30:01	113	1	9	9	TTQALQLFL	TTQALQLFL	TTQALQLFL	0.047595	3
HLA-B*15:01	114	1	9	9	SQIPSSSPT	SQIPSSSPT	SQIPSSSPT	0.047487	2.5
HLA-A*30:01	126	1	9	9	HTPQFLFQL	HTPQFLFQL	HTPQFLFQL	0.047344	3
HLA-A*30:02	24	1	9	9	RLASTVIYR	RLASTVIYR	RLASTVIYR	0.04728	2.3
HLA-A*30:01	26	1	9	9	FQKAFSMPL	FQKAFSMPL	FQKAFSMPL	0.046782	3
HLA-A*68:01	137	1	9	9	YTEGLMHNQ	YTEGLMHNQ	YTEGLMHNQ	0.046764	3.7
HLA-A*33:01	85	1	9	9	GILGSLGLR	GILGSLGLR	GILGSLGLR	0.046414	2.3
HLA-B*08:01	31	1	9	9	IPSSSPTTA	IPSSSPTTA	IPSSSPTTA	0.046241	2.2
HLA-A*23:01	9	1	9	9	ETTQALQLF	ETTQALQLF	ETTQALQLF	0.046104	1.3
HLA-A*01:01	137	1	9	9	YTEGLMHNQ	YTEGLMHNQ	YTEGLMHNQ	0.04604	1.6
HLA-A*26:01	105	1	9	9	SSYYATSYL	SSYYATSYL	SSYYATSYL	0.046017	1.3
HLA-A*68:02	60	1	9	9	TVIYRGVNF	TVIYRGVNF	TVIYRGVNF	0.045969	2.1
HLA-A*33:01	81	1	9	9	VWVIILFQK	VWVIILFQK	VWVIILFQK	0.045891	2.3
HLA-A*30:02	47	1	9	9	RPHTPQFLF	RPHTPQFLF	RPHTPQFLF	0.045777	2.3
HLA-A*02:01	166	1	9	9	TTGRLIWTL	TTGRLIWTL	TTGRLIWTL	0.045772	2.2
HLA-B*51:01	83	1	9	9	ILFQKAFSM	ILFQKAFSM	ILFQKAFSM	0.045563	2.4
HLA-A*32:01	125	1	9	9	GAQHSTTLF	GAQHSTTLF	GAQHSTTLF	0.045165	1.4
HLA-A*30:02	168	1	9	9	QLKSVGLNL	QLKSVGLNL	QLKSVGLNL	0.045034	2.4
HLA-A*68:02	158	1	9	9	LITSTVTGI	LITSTVTGI	LITSTVTGI	0.044729	2.1
HLA-B*15:01	179	1	9	9	NYTENTSSY	NYTENTSSY	NYTENTSSY	0.044409	2.6
HLA-A*24:02	176	1	9	9	LLQLPRDKF	LLQLPRDKF	LLQLPRDKF	0.044216	1.4
HLA-A*23:01	184	1	9	9	QHNAAGIAW	QHNAAGIAW	QHNAAGIAW	0.044191	1.4
HLA-B*58:01	36	1	9	9	QLRGEELSF	QLRGEELSF	QLRGEELSF	0.044189	2
HLA-B*15:01	174	1	9	9	GIYTEGLMH	GIYTEGLMH	GIYTEGLMH	0.044179	2.6
HLA-B*08:01	166	1	9	9	TTGRLIWTL	TTGRLIWTL	TTGRLIWTL	0.043963	2.3
HLA-A*33:01	170	1	9	9	QLNDTIHLH	QLNDTIHLH	QLNDTIHLH	0.043671	2.4
HLA-B*58:01	87	1	9	9	NADIGEWAF	NADIGEWAF	NADIGEWAF	0.043547	2.1
HLA-A*24:02	60	1	9	9	TVIYRGVNF	TVIYRGVNF	TVIYRGVNF	0.04343	1.5
HLA-B*07:02	142	1	9	9	HIPEGETTL	HIPEGETTL	HIPEGETTL	0.043344	1.8
HLA-B*35:01	58	1	9	9	VIILFQKAF	VIILFQKAF	VIILFQKAF	0.043242	1.7
HLA-A*01:01	179	1	9	9	NYTENTSSY	NYTENTSSY	NYTENTSSY	0.043135	1.7
HLA-A*30:01	81	1	9	9	VWVIILFQK	VWVIILFQK	VWVIILFQK	0.043046	3.2
HLA-B*51:01	75	1	9	9	ITTAVKTVL	ITTAVKTVL	ITTAVKTVL	0.042625	2.5
HLA-A*33:01	5	1	9	9	YYATSYLEY	YYATSYLEY	YYATSYLEY	0.042516	2.5
HLA-B*07:02	36	1	9	9	QLRGEELSF	QLRGEELSF	QLRGEELSF	0.042465	1.9
HLA-B*57:01	77	1	9	9	LFKIDNNTF	LFKIDNNTF	LFKIDNNTF	0.042446	3.2
HLA-B*35:01	77	1	9	9	LFKIDNNTF	LFKIDNNTF	LFKIDNNTF	0.042384	1.8
HLA-A*68:01	71	1	9	9	IIALLCVCK	IIALLCVCK	IIALLCVCK	0.042324	3.8
HLA-B*08:01	4	1	9	9	FHKDGAFFL	FHKDGAFFL	FHKDGAFFL	0.042109	2.4
HLA-A*02:01	100	1	9	9	HMQISTIGI	HMQISTIGI	HMQISTIGI	0.042031	2.4
HLA-A*26:01	147	1	9	9	EIENFGAQH	EIENFGAQH	EIENFGAQH	0.041832	1.4
HLA-A*02:06	64	1	9	9	AGIAWIPYF	AGIAWIPYF	AGIAWIPYF	0.041713	3
HLA-A*02:06	117	1	9	9	YLEYEIENF	YLEYEIENF	YLEYEIENF	0.041111	3.1
HLA-A*23:01	166	1	9	9	TTGRLIWTL	TTGRLIWTL	TTGRLIWTL	0.040983	1.4
HLA-B*53:01	82	1	9	9	GVPPKVVSY	GVPPKVVSY	GVPPKVVSY	0.04094	1.5
HLA-A*23:01	176	1	9	9	LLQLPRDKF	LLQLPRDKF	LLQLPRDKF	0.040789	1.4
HLA-A*24:02	140	1	9	9	KFRKSSFFV	KFRKSSFFV	KFRKSSFFV	0.040738	1.5
HLA-B*35:01	72	1	9	9	SPGMVPLHI	SPGMVPLHI	SPGMVPLHI	0.040722	1.8
HLA-A*01:01	113	1	9	9	TTQALQLFL	TTQALQLFL	TTQALQLFL	0.040536	1.7
HLA-A*32:01	100	1	9	9	HMQISTIGI	HMQISTIGI	HMQISTIGI	0.040394	1.5
HLA-A*24:02	83	1	9	9	ILFQKAFSM	ILFQKAFSM	ILFQKAFSM	0.040309	1.5
HLA-B*51:01	90	1	9	9	GPCPGDYAF	GPCPGDYAF	GPCPGDYAF	0.040294	2.6
HLA-B*07:02	148	1	9	9	SPTTAPSPE	SPTTAPSPE	SPTTAPSPE	0.040292	1.9
HLA-A*33:01	102	1	9	9	GLSLLQLPR	GLSLLQLPR	GLSLLQLPR	0.039826	2.6
HLA-B*07:02	66	1	9	9	ILAKPKETF	ILAKPKETF	ILAKPKETF	0.039808	1.9
HLA-A*02:01	28	1	9	9	ITDKINQII	ITDKINQII	ITDKINQII	0.039801	2.4
HLA-A*30:02	93	1	9	9	STDIPSATK	STDIPSATK	STDIPSATK	0.03956	2.6
HLA-A*02:06	18	1	9	9	KSSFFVWVI	KSSFFVWVI	KSSFFVWVI	0.039503	3.1
HLA-A*68:01	182	1	9	9	QLPRDKFRK	QLPRDKFRK	QLPRDKFRK	0.039298	4
HLA-A*31:01	101	1	9	9	SLLQLPRDK	SLLQLPRDK	SLLQLPRDK	0.03889	3.5
HLA-B*58:01	5	1	9	9	YYATSYLEY	YYATSYLEY	YYATSYLEY	0.038799	2.2
HLA-A*11:01	1	1	9	9	YTENTSSYY	YTENTSSYY	YTENTSSYY	0.038791	2.4
HLA-A*32:01	130	1	9	9	NINADIGEW	NINADIGEW	NINADIGEW	0.038728	1.6
HLA-B*53:01	125	1	9	9	GAQHSTTLF	GAQHSTTLF	GAQHSTTLF	0.038501	1.6
HLA-A*02:06	75	1	9	9	ITTAVKTVL	ITTAVKTVL	ITTAVKTVL	0.038248	3.2
HLA-A*24:02	117	1	9	9	YLEYEIENF	YLEYEIENF	YLEYEIENF	0.038189	1.5
HLA-A*23:01	58	1	9	9	VIILFQKAF	VIILFQKAF	VIILFQKAF	0.038059	1.5
HLA-B*53:01	3	1	9	9	ISDRATRKY	ISDRATRKY	ISDRATRKY	0.038004	1.6
HLA-A*32:01	28	1	9	9	ITDKINQII	ITDKINQII	ITDKINQII	0.037565	1.6
HLA-A*26:01	58	1	9	9	VIILFQKAF	VIILFQKAF	VIILFQKAF	0.03756	1.5
HLA-A*03:01	157	1	9	9	ITKGRISDR	ITKGRISDR	ITKGRISDR	0.037407	2.5
HLA-A*26:01	99	1	9	9	TIIGTNGNH	TIIGTNGNH	TIIGTNGNH	0.037357	1.5
HLA-A*02:01	158	1	9	9	LITSTVTGI	LITSTVTGI	LITSTVTGI	0.03731	2.5
HLA-A*32:01	184	1	9	9	QHNAAGIAW	QHNAAGIAW	QHNAAGIAW	0.03711	1.6
HLA-A*23:01	82	1	9	9	GVPPKVVSY	GVPPKVVSY	GVPPKVVSY	0.037048	1.5
HLA-B*07:02	162	1	9	9	RATRKYSDL	RATRKYSDL	RATRKYSDL	0.036865	2
HLA-A*24:02	184	1	9	9	QHNAAGIAW	QHNAAGIAW	QHNAAGIAW	0.036842	1.6
HLA-A*02:03	82	1	9	9	GVPPKVVSY	GVPPKVVSY	GVPPKVVSY	0.036704	2.8
HLA-B*57:01	5	1	9	9	YYATSYLEY	YYATSYLEY	YYATSYLEY	0.036696	3.4
HLA-A*02:03	114	1	9	9	SQIPSSSPT	SQIPSSSPT	SQIPSSSPT	0.036605	2.8
HLA-B*57:01	87	1	9	9	NADIGEWAF	NADIGEWAF	NADIGEWAF	0.036573	3.4
HLA-B*15:01	47	1	9	9	RPHTPQFLF	RPHTPQFLF	RPHTPQFLF	0.036494	2.9
HLA-A*02:01	136	1	9	9	ALLCVCKLL	ALLCVCKLL	ALLCVCKLL	0.036124	2.6
HLA-A*31:01	44	1	9	9	KINQIIHDF	KINQIIHDF	KINQIIHDF	0.036085	3.6
HLA-A*24:02	40	1	9	9	SFFVWVIIL	SFFVWVIIL	SFFVWVIIL	0.036063	1.6
HLA-A*32:01	38	1	9	9	YAFHKDGAF	YAFHKDGAF	YAFHKDGAF	0.035916	1.7
HLA-A*02:03	144	1	9	9	GIIIAIIAL	GIIIAIIAL	GIIIAIIAL	0.035794	2.9
HLA-A*33:01	129	1	9	9	KIDNNTFVR	KIDNNTFVR	KIDNNTFVR	0.035756	2.7
HLA-A*32:01	75	1	9	9	ITTAVKTVL	ITTAVKTVL	ITTAVKTVL	0.035406	1.7
HLA-A*32:01	3	1	9	9	ISDRATRKY	ISDRATRKY	ISDRATRKY	0.035382	1.7
HLA-B*57:01	48	1	9	9	LANETTQAL	LANETTQAL	LANETTQAL	0.035296	3.5
HLA-B*57:01	83	1	9	9	ILFQKAFSM	ILFQKAFSM	ILFQKAFSM	0.035103	3.5
HLA-A*02:01	117	1	9	9	YLEYEIENF	YLEYEIENF	YLEYEIENF	0.034822	2.6
HLA-A*23:01	117	1	9	9	YLEYEIENF	YLEYEIENF	YLEYEIENF	0.034702	1.6
HLA-A*31:01	30	1	9	9	VIAFLILAK	VIAFLILAK	VIAFLILAK	0.034671	3.6
HLA-A*24:02	61	1	9	9	ILNRKAIDF	ILNRKAIDF	ILNRKAIDF	0.034622	1.6
HLA-B*08:01	58	1	9	9	VIILFQKAF	VIILFQKAF	VIILFQKAF	0.034433	2.7
HLA-B*51:01	142	1	9	9	HIPEGETTL	HIPEGETTL	HIPEGETTL	0.034192	2.9
HLA-A*24:02	82	1	9	9	GVPPKVVSY	GVPPKVVSY	GVPPKVVSY	0.034065	1.6
HLA-B*15:01	160	1	9	9	NQNALVCGL	NQNALVCGL	NQNALVCGL	0.033879	3
HLA-A*02:01	48	1	9	9	LANETTQAL	LANETTQAL	LANETTQAL	0.033797	2.7
HLA-A*68:02	82	1	9	9	GVPPKVVSY	GVPPKVVSY	GVPPKVVSY	0.033787	2.6
HLA-B*57:01	146	1	9	9	TTELRTYTI	TTELRTYTI	TTELRTYTI	0.033737	3.5
HLA-A*30:02	126	1	9	9	HTPQFLFQL	HTPQFLFQL	HTPQFLFQL	0.03369	2.9
HLA-A*32:01	45	1	9	9	FQLNDTIHL	FQLNDTIHL	FQLNDTIHL	0.033666	1.7
HLA-B*53:01	44	1	9	9	KINQIIHDF	KINQIIHDF	KINQIIHDF	0.033593	1.7
HLA-B*35:01	117	1	9	9	YLEYEIENF	YLEYEIENF	YLEYEIENF	0.033282	2
HLA-A*02:03	59	1	9	9	FAEGVIAFL	FAEGVIAFL	FAEGVIAFL	0.033256	3
HLA-B*58:01	60	1	9	9	TVIYRGVNF	TVIYRGVNF	TVIYRGVNF	0.033224	2.4
HLA-A*68:01	5	1	9	9	YYATSYLEY	YYATSYLEY	YYATSYLEY	0.033222	4.3
HLA-A*31:01	126	1	9	9	HTPQFLFQL	HTPQFLFQL	HTPQFLFQL	0.033059	3.7
HLA-B*57:01	176	1	9	9	LLQLPRDKF	LLQLPRDKF	LLQLPRDKF	0.033029	3.6
HLA-B*51:01	108	1	9	9	LYDRLASTV	LYDRLASTV	LYDRLASTV	0.032654	3
HLA-B*44:03	11	1	9	9	HKDGAFFLY	HKDGAFFLY	HKDGAFFLY	0.032548	1.6
HLA-A*33:01	126	1	9	9	HTPQFLFQL	HTPQFLFQL	HTPQFLFQL	0.032334	2.9
HLA-A*30:02	65	1	9	9	NFAEGVIAF	NFAEGVIAF	NFAEGVIAF	0.032172	3
HLA-A*02:06	46	1	9	9	DTIHLHQQL	DTIHLHQQL	DTIHLHQQL	0.032149	3.6
HLA-A*68:01	102	1	9	9	GLSLLQLPR	GLSLLQLPR	GLSLLQLPR	0.032049	4.4
HLA-B*07:02	105	1	9	9	SSYYATSYL	SSYYATSYL	SSYYATSYL	0.031916	2.2
HLA-A*31:01	140	1	9	9	KFRKSSFFV	KFRKSSFFV	KFRKSSFFV	0.031824	3.8
HLA-A*30:02	118	1	9	9	KNSPGMVPL	KNSPGMVPL	KNSPGMVPL	0.031666	3
HLA-A*31:01	83	1	9	9	ILFQKAFSM	ILFQKAFSM	ILFQKAFSM	0.031435	3.8
HLA-A*68:02	28	1	9	9	ITDKINQII	ITDKINQII	ITDKINQII	0.031347	2.7
HLA-B*51:01	134	1	9	9	TTPENITTA	TTPENITTA	TTPENITTA	0.031224	3.1
HLA-A*30:02	61	1	9	9	ILNRKAIDF	ILNRKAIDF	ILNRKAIDF	0.031192	3.1
HLA-A*02:01	82	1	9	9	GVPPKVVSY	GVPPKVVSY	GVPPKVVSY	0.03111	2.8
HLA-A*30:01	180	1	9	9	FLRATTELR	FLRATTELR	FLRATTELR	0.031043	4
HLA-B*53:01	60	1	9	9	TVIYRGVNF	TVIYRGVNF	TVIYRGVNF	0.030963	1.8
HLA-A*68:02	53	1	9	9	LVPKNSPGM	LVPKNSPGM	LVPKNSPGM	0.030852	2.7
HLA-A*68:02	55	1	9	9	FGAQHSTTL	FGAQHSTTL	FGAQHSTTL	0.03065	2.7
HLA-A*32:01	26	1	9	9	FQKAFSMPL	FQKAFSMPL	FQKAFSMPL	0.030437	1.8
HLA-A*68:02	51	1	9	9	FLYDRLAST	FLYDRLAST	FLYDRLAST	0.03025	2.8
HLA-A*23:01	140	1	9	9	KFRKSSFFV	KFRKSSFFV	KFRKSSFFV	0.030237	1.7
HLA-B*57:01	17	1	9	9	RTYTILNRK	RTYTILNRK	RTYTILNRK	0.030226	3.7
HLA-A*30:02	23	1	9	9	RISDRATRK	RISDRATRK	RISDRATRK	0.030102	3.1
HLA-A*68:01	179	1	9	9	NYTENTSSY	NYTENTSSY	NYTENTSSY	0.030075	4.5
HLA-A*30:01	173	1	9	9	SYYATSYLE	SYYATSYLE	SYYATSYLE	0.029989	4.2
HLA-A*30:02	99	1	9	9	TIIGTNGNH	TIIGTNGNH	TIIGTNGNH	0.029858	3.2
HLA-A*26:01	52	1	9	9	IIIAIIALL	IIIAIIALL	IIIAIIALL	0.029774	1.7
HLA-B*08:01	45	1	9	9	FQLNDTIHL	FQLNDTIHL	FQLNDTIHL	0.029691	3
HLA-B*53:01	179	1	9	9	NYTENTSSY	NYTENTSSY	NYTENTSSY	0.029647	1.9
HLA-B*15:01	55	1	9	9	FGAQHSTTL	FGAQHSTTL	FGAQHSTTL	0.029507	3.2
HLA-A*30:01	64	1	9	9	AGIAWIPYF	AGIAWIPYF	AGIAWIPYF	0.029303	4.2
HLA-A*23:01	45	1	9	9	FQLNDTIHL	FQLNDTIHL	FQLNDTIHL	0.029035	1.7
HLA-A*32:01	118	1	9	9	KNSPGMVPL	KNSPGMVPL	KNSPGMVPL	0.028866	1.9
HLA-B*15:01	13	1	9	9	GTGPCPGDY	GTGPCPGDY	GTGPCPGDY	0.028843	3.2
HLA-A*24:02	150	1	9	9	FRKSSFFVW	FRKSSFFVW	FRKSSFFVW	0.02882	1.8
HLA-A*30:01	114	1	9	9	SQIPSSSPT	SQIPSSSPT	SQIPSSSPT	0.028444	4.3
HLA-A*02:03	105	1	9	9	SSYYATSYL	SSYYATSYL	SSYYATSYL	0.027564	3.3
HLA-A*30:01	83	1	9	9	ILFQKAFSM	ILFQKAFSM	ILFQKAFSM	0.02739	4.4
HLA-A*32:01	5	1	9	9	YYATSYLEY	YYATSYLEY	YYATSYLEY	0.027191	2
HLA-B*08:01	69	1	9	9	EWAENCYNL	EWAENCYNL	EWAENCYNL	0.027139	3.2
HLA-A*68:01	134	1	9	9	TTPENITTA	TTPENITTA	TTPENITTA	0.027053	4.7
HLA-A*32:01	2	1	9	9	TSSYYATSY	TSSYYATSY	TSSYYATSY	0.026947	2
HLA-A*23:01	61	1	9	9	ILNRKAIDF	ILNRKAIDF	ILNRKAIDF	0.026938	1.8
HLA-A*30:01	123	1	9	9	VVTNSTLEV	VVTNSTLEV	VVTNSTLEV	0.026887	4.5
HLA-A*26:01	47	1	9	9	RPHTPQFLF	RPHTPQFLF	RPHTPQFLF	0.026879	1.8
HLA-A*68:01	105	1	9	9	SSYYATSYL	SSYYATSYL	SSYYATSYL	0.026784	4.7
HLA-B*53:01	55	1	9	9	FGAQHSTTL	FGAQHSTTL	FGAQHSTTL	0.026678	2
HLA-B*58:01	46	1	9	9	DTIHLHQQL	DTIHLHQQL	DTIHLHQQL	0.026671	2.6
HLA-A*30:02	176	1	9	9	LLQLPRDKF	LLQLPRDKF	LLQLPRDKF	0.026592	3.4
HLA-B*35:01	44	1	9	9	KINQIIHDF	KINQIIHDF	KINQIIHDF	0.026444	2.3
HLA-A*30:01	182	1	9	9	QLPRDKFRK	QLPRDKFRK	QLPRDKFRK	0.026332	4.5
HLA-A*26:01	83	1	9	9	ILFQKAFSM	ILFQKAFSM	ILFQKAFSM	0.026313	1.9
HLA-A*32:01	65	1	9	9	NFAEGVIAF	NFAEGVIAF	NFAEGVIAF	0.026131	2
HLA-B*07:02	118	1	9	9	KNSPGMVPL	KNSPGMVPL	KNSPGMVPL	0.025996	2.4
HLA-A*30:02	123	1	9	9	VVTNSTLEV	VVTNSTLEV	VVTNSTLEV	0.025877	3.5
HLA-A*31:01	19	1	9	9	ILGSLGLRK	ILGSLGLRK	ILGSLGLRK	0.025842	4.2
HLA-B*51:01	9	1	9	9	ETTQALQLF	ETTQALQLF	ETTQALQLF	0.025841	3.4
HLA-B*51:01	110	1	9	9	ITETAATII	ITETAATII	ITETAATII	0.025792	3.4
HLA-A*30:02	113	1	9	9	TTQALQLFL	TTQALQLFL	TTQALQLFL	0.025678	3.5
HLA-B*08:01	40	1	9	9	SFFVWVIIL	SFFVWVIIL	SFFVWVIIL	0.025652	3.3
HLA-A*68:01	54	1	9	9	ETITETAAT	ETITETAAT	ETITETAAT	0.025567	4.8
HLA-A*68:02	22	1	9	9	TPENITTAV	TPENITTAV	TPENITTAV	0.025382	3.1
HLA-A*02:03	36	1	9	9	QLRGEELSF	QLRGEELSF	QLRGEELSF	0.025368	3.5
HLA-A*31:01	182	1	9	9	QLPRDKFRK	QLPRDKFRK	QLPRDKFRK	0.025344	4.2
HLA-A*68:01	67	1	9	9	EVTEIDQLV	EVTEIDQLV	EVTEIDQLV	0.02528	4.8
HLA-A*02:01	143	1	9	9	TVTGILGSL	TVTGILGSL	TVTGILGSL	0.025268	3.1
HLA-A*01:01	47	1	9	9	RPHTPQFLF	RPHTPQFLF	RPHTPQFLF	0.025168	2.3
HLA-B*58:01	58	1	9	9	VIILFQKAF	VIILFQKAF	VIILFQKAF	0.025035	2.7
HLA-A*02:01	170	1	9	9	QLNDTIHLH	QLNDTIHLH	QLNDTIHLH	0.025031	3.2
HLA-A*02:06	118	1	9	9	KNSPGMVPL	KNSPGMVPL	KNSPGMVPL	0.0249	4.2
HLA-A*01:01	97	1	9	9	AAGIAWIPY	AAGIAWIPY	AAGIAWIPY	0.024861	2.3
HLA-A*02:01	145	1	9	9	FKIDNNTFV	FKIDNNTFV	FKIDNNTFV	0.024657	3.2
HLA-A*68:01	147	1	9	9	EIENFGAQH	EIENFGAQH	EIENFGAQH	0.024605	4.9
HLA-A*32:01	9	1	9	9	ETTQALQLF	ETTQALQLF	ETTQALQLF	0.024601	2.1
HLA-A*30:01	75	1	9	9	ITTAVKTVL	ITTAVKTVL	ITTAVKTVL	0.024567	4.7
HLA-A*02:06	100	1	9	9	HMQISTIGI	HMQISTIGI	HMQISTIGI	0.02455	4.2
HLA-B*07:02	38	1	9	9	YAFHKDGAF	YAFHKDGAF	YAFHKDGAF	0.024534	2.5
HLA-B*51:01	52	1	9	9	IIIAIIALL	IIIAIIALL	IIIAIIALL	0.024247	3.6
HLA-B*53:01	2	1	9	9	TSSYYATSY	TSSYYATSY	TSSYYATSY	0.024142	2.1
HLA-A*23:01	36	1	9	9	QLRGEELSF	QLRGEELSF	QLRGEELSF	0.023858	1.9
HLA-B*51:01	158	1	9	9	LITSTVTGI	LITSTVTGI	LITSTVTGI	0.023718	3.6
HLA-B*08:01	176	1	9	9	LLQLPRDKF	LLQLPRDKF	LLQLPRDKF	0.023669	3.5
HLA-B*57:01	52	1	9	9	IIIAIIALL	IIIAIIALL	IIIAIIALL	0.023666	4.2
HLA-A*01:01	15	1	9	9	KCNPNLHYW	KCNPNLHYW	KCNPNLHYW	0.023665	2.4
HLA-A*32:01	170	1	9	9	QLNDTIHLH	QLNDTIHLH	QLNDTIHLH	0.023587	2.1
HLA-A*68:01	99	1	9	9	TIIGTNGNH	TIIGTNGNH	TIIGTNGNH	0.023546	5
HLA-A*03:01	83	1	9	9	ILFQKAFSM	ILFQKAFSM	ILFQKAFSM	0.023437	3.2
HLA-A*26:01	48	1	9	9	LANETTQAL	LANETTQAL	LANETTQAL	0.023424	2
HLA-B*08:01	126	1	9	9	HTPQFLFQL	HTPQFLFQL	HTPQFLFQL	0.023401	3.5
HLA-A*33:01	83	1	9	9	ILFQKAFSM	ILFQKAFSM	ILFQKAFSM	0.023396	3.4
HLA-A*26:01	66	1	9	9	ILAKPKETF	ILAKPKETF	ILAKPKETF	0.023357	2
HLA-B*35:01	53	1	9	9	LVPKNSPGM	LVPKNSPGM	LVPKNSPGM	0.023266	2.4
HLA-B*57:01	41	1	9	9	RSRRQTNTK	RSRRQTNTK	RSRRQTNTK	0.023095	4.3
HLA-B*07:02	109	1	9	9	GLMHNQNAL	GLMHNQNAL	GLMHNQNAL	0.022894	2.6
HLA-A*30:02	38	1	9	9	YAFHKDGAF	YAFHKDGAF	YAFHKDGAF	0.022741	3.8
HLA-A*68:02	145	1	9	9	FKIDNNTFV	FKIDNNTFV	FKIDNNTFV	0.022626	3.3
HLA-B*44:02	11	1	9	9	HKDGAFFLY	HKDGAFFLY	HKDGAFFLY	0.022583	1.8
HLA-A*03:01	171	1	9	9	TQALQLFLR	TQALQLFLR	TQALQLFLR	0.022561	3.2
HLA-B*15:01	37	1	9	9	AQHSTTLFK	AQHSTTLFK	AQHSTTLFK	0.022539	3.6
HLA-A*30:01	170	1	9	9	QLNDTIHLH	QLNDTIHLH	QLNDTIHLH	0.022246	5.1
HLA-B*51:01	104	1	9	9	IPYFGPGAE	IPYFGPGAE	IPYFGPGAE	0.022118	3.8
HLA-A*24:02	58	1	9	9	VIILFQKAF	VIILFQKAF	VIILFQKAF	0.022066	2
HLA-A*68:01	41	1	9	9	RSRRQTNTK	RSRRQTNTK	RSRRQTNTK	0.022007	5.1
HLA-B*58:01	77	1	9	9	LFKIDNNTF	LFKIDNNTF	LFKIDNNTF	0.021974	2.9
HLA-A*02:01	24	1	9	9	RLASTVIYR	RLASTVIYR	RLASTVIYR	0.02193	3.4
HLA-A*68:02	18	1	9	9	KSSFFVWVI	KSSFFVWVI	KSSFFVWVI	0.021815	3.3
HLA-A*01:01	125	1	9	9	GAQHSTTLF	GAQHSTTLF	GAQHSTTLF	0.021699	2.5
HLA-B*15:01	53	1	9	9	LVPKNSPGM	LVPKNSPGM	LVPKNSPGM	0.021669	3.7
HLA-A*02:06	170	1	9	9	QLNDTIHLH	QLNDTIHLH	QLNDTIHLH	0.02164	4.5
HLA-A*24:02	125	1	9	9	GAQHSTTLF	GAQHSTTLF	GAQHSTTLF	0.02159	2.1
HLA-B*53:01	150	1	9	9	FRKSSFFVW	FRKSSFFVW	FRKSSFFVW	0.021554	2.2
HLA-B*44:02	82	1	9	9	GVPPKVVSY	GVPPKVVSY	GVPPKVVSY	0.021481	1.8
HLA-B*08:01	96	1	9	9	GPTTEAPTL	GPTTEAPTL	GPTTEAPTL	0.021417	3.8
HLA-A*02:01	55	1	9	9	FGAQHSTTL	FGAQHSTTL	FGAQHSTTL	0.021383	3.4
HLA-A*30:01	119	1	9	9	QWIPAGIGI	QWIPAGIGI	QWIPAGIGI	0.021227	5.2
HLA-A*01:01	129	1	9	9	KIDNNTFVR	KIDNNTFVR	KIDNNTFVR	0.021213	2.5
HLA-A*32:01	109	1	9	9	GLMHNQNAL	GLMHNQNAL	GLMHNQNAL	0.021096	2.3
HLA-B*53:01	36	1	9	9	QLRGEELSF	QLRGEELSF	QLRGEELSF	0.021037	2.2
HLA-A*33:01	65	1	9	9	NFAEGVIAF	NFAEGVIAF	NFAEGVIAF	0.021028	3.6
HLA-B*53:01	11	1	9	9	HKDGAFFLY	HKDGAFFLY	HKDGAFFLY	0.021016	2.2
HLA-B*57:01	84	1	9	9	AFHKDGAFF	AFHKDGAFF	AFHKDGAFF	0.020939	4.5
HLA-A*30:01	40	1	9	9	SFFVWVIIL	SFFVWVIIL	SFFVWVIIL	0.020873	5.3
HLA-B*08:01	86	1	9	9	DHLASTDQL	DHLASTDQL	DHLASTDQL	0.0207	3.8
HLA-B*35:01	130	1	9	9	NINADIGEW	NINADIGEW	NINADIGEW	0.020619	2.6
HLA-B*08:01	150	1	9	9	FRKSSFFVW	FRKSSFFVW	FRKSSFFVW	0.020596	3.8
HLA-B*51:01	64	1	9	9	AGIAWIPYF	AGIAWIPYF	AGIAWIPYF	0.020532	4
HLA-A*33:01	93	1	9	9	STDIPSATK	STDIPSATK	STDIPSATK	0.020509	3.6
HLA-B*35:01	170	1	9	9	QLNDTIHLH	QLNDTIHLH	QLNDTIHLH	0.02044	2.6
HLA-B*57:01	61	1	9	9	ILNRKAIDF	ILNRKAIDF	ILNRKAIDF	0.020432	4.5
HLA-A*03:01	132	1	9	9	RATTELRTY	RATTELRTY	RATTELRTY	0.020403	3.4
HLA-B*57:01	11	1	9	9	HKDGAFFLY	HKDGAFFLY	HKDGAFFLY	0.020399	4.5
HLA-A*26:01	27	1	9	9	VVSYEAGEW	VVSYEAGEW	VVSYEAGEW	0.020132	2.2
HLA-A*30:01	5	1	9	9	YYATSYLEY	YYATSYLEY	YYATSYLEY	0.02003	5.4
HLA-B*07:02	87	1	9	9	NADIGEWAF	NADIGEWAF	NADIGEWAF	0.019951	2.7
HLA-A*32:01	143	1	9	9	TVTGILGSL	TVTGILGSL	TVTGILGSL	0.019882	2.4
HLA-B*15:01	9	1	9	9	ETTQALQLF	ETTQALQLF	ETTQALQLF	0.019815	3.9
HLA-A*02:06	65	1	9	9	NFAEGVIAF	NFAEGVIAF	NFAEGVIAF	0.019799	4.7
HLA-A*02:03	170	1	9	9	QLNDTIHLH	QLNDTIHLH	QLNDTIHLH	0.019776	4
HLA-B*40:01	26	1	9	9	FQKAFSMPL	FQKAFSMPL	FQKAFSMPL	0.019733	2.1
HLA-B*57:01	97	1	9	9	AAGIAWIPY	AAGIAWIPY	AAGIAWIPY	0.019714	4.6
HLA-A*30:01	60	1	9	9	TVIYRGVNF	TVIYRGVNF	TVIYRGVNF	0.019702	5.5
HLA-A*26:01	3	1	9	9	ISDRATRKY	ISDRATRKY	ISDRATRKY	0.019571	2.2
HLA-A*68:02	168	1	9	9	QLKSVGLNL	QLKSVGLNL	QLKSVGLNL	0.019391	3.6
HLA-A*30:02	77	1	9	9	LFKIDNNTF	LFKIDNNTF	LFKIDNNTF	0.01933	4.2
HLA-A*02:01	113	1	9	9	TTQALQLFL	TTQALQLFL	TTQALQLFL	0.019295	3.6
HLA-A*33:01	179	1	9	9	NYTENTSSY	NYTENTSSY	NYTENTSSY	0.019191	3.8
HLA-A*02:01	44	1	9	9	KINQIIHDF	KINQIIHDF	KINQIIHDF	0.019152	3.6
HLA-A*33:01	166	1	9	9	TTGRLIWTL	TTGRLIWTL	TTGRLIWTL	0.019136	3.8
HLA-A*01:01	126	1	9	9	HTPQFLFQL	HTPQFLFQL	HTPQFLFQL	0.019127	2.6
HLA-B*53:01	175	1	9	9	LPSQNSTEG	LPSQNSTEG	LPSQNSTEG	0.019125	2.3
HLA-A*02:03	67	1	9	9	EVTEIDQLV	EVTEIDQLV	EVTEIDQLV	0.019017	4.1
HLA-A*01:01	110	1	9	9	ITETAATII	ITETAATII	ITETAATII	0.018831	2.7
HLA-A*30:01	171	1	9	9	TQALQLFLR	TQALQLFLR	TQALQLFLR	0.018825	5.7
HLA-A*23:01	46	1	9	9	DTIHLHQQL	DTIHLHQQL	DTIHLHQQL	0.018799	2.1
HLA-A*32:01	117	1	9	9	YLEYEIENF	YLEYEIENF	YLEYEIENF	0.018783	2.4
HLA-B*53:01	117	1	9	9	YLEYEIENF	YLEYEIENF	YLEYEIENF	0.018637	2.4
HLA-A*23:01	173	1	9	9	SYYATSYLE	SYYATSYLE	SYYATSYLE	0.018586	2.1
HLA-B*44:02	47	1	9	9	RPHTPQFLF	RPHTPQFLF	RPHTPQFLF	0.018571	2
HLA-A*26:01	163	1	9	9	YTILNRKAI	YTILNRKAI	YTILNRKAI	0.018556	2.3
HLA-A*32:01	37	1	9	9	AQHSTTLFK	AQHSTTLFK	AQHSTTLFK	0.018532	2.4
HLA-B*58:01	83	1	9	9	ILFQKAFSM	ILFQKAFSM	ILFQKAFSM	0.018517	3.1
HLA-A*26:01	59	1	9	9	FAEGVIAFL	FAEGVIAFL	FAEGVIAFL	0.018514	2.3
HLA-A*02:06	163	1	9	9	YTILNRKAI	YTILNRKAI	YTILNRKAI	0.018417	4.9
HLA-A*32:01	46	1	9	9	DTIHLHQQL	DTIHLHQQL	DTIHLHQQL	0.018387	2.5
HLA-A*03:01	2	1	9	9	TSSYYATSY	TSSYYATSY	TSSYYATSY	0.018379	3.6
HLA-A*30:02	9	1	9	9	ETTQALQLF	ETTQALQLF	ETTQALQLF	0.018345	4.3
HLA-B*58:01	11	1	9	9	HKDGAFFLY	HKDGAFFLY	HKDGAFFLY	0.018337	3.1
HLA-A*02:06	36	1	9	9	QLRGEELSF	QLRGEELSF	QLRGEELSF	0.018163	4.9
HLA-B*51:01	131	1	9	9	ITSTVTGIL	ITSTVTGIL	ITSTVTGIL	0.018161	4.3
HLA-B*53:01	126	1	9	9	HTPQFLFQL	HTPQFLFQL	HTPQFLFQL	0.018157	2.4
HLA-B*08:01	44	1	9	9	KINQIIHDF	KINQIIHDF	KINQIIHDF	0.01807	4.2
HLA-A*33:01	82	1	9	9	GVPPKVVSY	GVPPKVVSY	GVPPKVVSY	0.017993	3.9
HLA-B*35:01	184	1	9	9	QHNAAGIAW	QHNAAGIAW	QHNAAGIAW	0.017959	2.8
HLA-A*32:01	146	1	9	9	TTELRTYTI	TTELRTYTI	TTELRTYTI	0.017935	2.5
HLA-B*53:01	67	1	9	9	EVTEIDQLV	EVTEIDQLV	EVTEIDQLV	0.017874	2.4
HLA-B*51:01	18	1	9	9	KSSFFVWVI	KSSFFVWVI	KSSFFVWVI	0.017804	4.3
HLA-A*30:02	48	1	9	9	LANETTQAL	LANETTQAL	LANETTQAL	0.017777	4.4
HLA-B*08:01	29	1	9	9	NETTQALQL	NETTQALQL	NETTQALQL	0.01777	4.2
HLA-B*07:02	60	1	9	9	TVIYRGVNF	TVIYRGVNF	TVIYRGVNF	0.017769	2.9
HLA-A*30:01	15	1	9	9	KCNPNLHYW	KCNPNLHYW	KCNPNLHYW	0.017732	5.9
HLA-A*26:01	117	1	9	9	YLEYEIENF	YLEYEIENF	YLEYEIENF	0.017548	2.3
HLA-B*58:01	84	1	9	9	AFHKDGAFF	AFHKDGAFF	AFHKDGAFF	0.017489	3.2
HLA-A*01:01	59	1	9	9	FAEGVIAFL	FAEGVIAFL	FAEGVIAFL	0.017457	2.7
HLA-B*51:01	166	1	9	9	TTGRLIWTL	TTGRLIWTL	TTGRLIWTL	0.017441	4.4
HLA-A*02:01	67	1	9	9	EVTEIDQLV	EVTEIDQLV	EVTEIDQLV	0.017433	3.8
HLA-A*30:01	36	1	9	9	QLRGEELSF	QLRGEELSF	QLRGEELSF	0.017379	6
HLA-B*51:01	113	1	9	9	TTQALQLFL	TTQALQLFL	TTQALQLFL	0.017371	4.4
HLA-B*07:02	83	1	9	9	ILFQKAFSM	ILFQKAFSM	ILFQKAFSM	0.017368	2.9
HLA-B*07:02	120	1	9	9	LFLRATTEL	LFLRATTEL	LFLRATTEL	0.01736	2.9
HLA-A*30:02	131	1	9	9	ITSTVTGIL	ITSTVTGIL	ITSTVTGIL	0.017281	4.5
HLA-A*33:01	73	1	9	9	QTNTKATGK	QTNTKATGK	QTNTKATGK	0.017246	4
HLA-B*51:01	4	1	9	9	FHKDGAFFL	FHKDGAFFL	FHKDGAFFL	0.01716	4.4
HLA-B*35:01	49	1	9	9	THTSGPSVM	THTSGPSVM	THTSGPSVM	0.017127	2.9
HLA-A*32:01	163	1	9	9	YTILNRKAI	YTILNRKAI	YTILNRKAI	0.016998	2.6
HLA-B*58:01	176	1	9	9	LLQLPRDKF	LLQLPRDKF	LLQLPRDKF	0.01696	3.3
HLA-A*31:01	32	1	9	9	HLASTDQLK	HLASTDQLK	HLASTDQLK	0.016949	5
HLA-A*31:01	64	1	9	9	AGIAWIPYF	AGIAWIPYF	AGIAWIPYF	0.016895	5
HLA-A*23:01	125	1	9	9	GAQHSTTLF	GAQHSTTLF	GAQHSTTLF	0.016884	2.2
HLA-A*02:03	136	1	9	9	ALLCVCKLL	ALLCVCKLL	ALLCVCKLL	0.016882	4.3
HLA-A*68:01	143	1	9	9	TVTGILGSL	TVTGILGSL	TVTGILGSL	0.016813	5.7
HLA-A*30:01	134	1	9	9	TTPENITTA	TTPENITTA	TTPENITTA	0.01681	6.1
HLA-A*24:02	45	1	9	9	FQLNDTIHL	FQLNDTIHL	FQLNDTIHL	0.016799	2.3
HLA-A*31:01	5	1	9	9	YYATSYLEY	YYATSYLEY	YYATSYLEY	0.016794	5
HLA-A*02:06	24	1	9	9	RLASTVIYR	RLASTVIYR	RLASTVIYR	0.016749	5.1
HLA-B*57:01	163	1	9	9	YTILNRKAI	YTILNRKAI	YTILNRKAI	0.016719	4.9
HLA-A*30:02	119	1	9	9	QWIPAGIGI	QWIPAGIGI	QWIPAGIGI	0.016597	4.6
HLA-A*01:01	134	1	9	9	TTPENITTA	TTPENITTA	TTPENITTA	0.016517	2.8
HLA-A*30:01	100	1	9	9	HMQISTIGI	HMQISTIGI	HMQISTIGI	0.016454	6.2
HLA-B*15:01	144	1	9	9	GIIIAIIAL	GIIIAIIAL	GIIIAIIAL	0.01642	4.2
HLA-A*33:01	69	1	9	9	EWAENCYNL	EWAENCYNL	EWAENCYNL	0.016389	4.1
HLA-B*35:01	45	1	9	9	FQLNDTIHL	FQLNDTIHL	FQLNDTIHL	0.016239	2.9
HLA-B*08:01	179	1	9	9	NYTENTSSY	NYTENTSSY	NYTENTSSY	0.016162	4.5
HLA-B*44:03	47	1	9	9	RPHTPQFLF	RPHTPQFLF	RPHTPQFLF	0.016101	2.3
HLA-A*11:01	132	1	9	9	RATTELRTY	RATTELRTY	RATTELRTY	0.016099	3.5
HLA-B*58:01	118	1	9	9	KNSPGMVPL	KNSPGMVPL	KNSPGMVPL	0.016087	3.4
HLA-B*53:01	77	1	9	9	LFKIDNNTF	LFKIDNNTF	LFKIDNNTF	0.016079	2.6
HLA-A*68:02	79	1	9	9	EGIYTEGLM	EGIYTEGLM	EGIYTEGLM	0.01593	4
HLA-B*44:03	82	1	9	9	GVPPKVVSY	GVPPKVVSY	GVPPKVVSY	0.015823	2.3
HLA-B*08:01	5	1	9	9	YYATSYLEY	YYATSYLEY	YYATSYLEY	0.015804	4.6
HLA-A*02:06	60	1	9	9	TVIYRGVNF	TVIYRGVNF	TVIYRGVNF	0.015646	5.4
HLA-A*24:02	36	1	9	9	QLRGEELSF	QLRGEELSF	QLRGEELSF	0.015639	2.4
HLA-A*24:02	173	1	9	9	SYYATSYLE	SYYATSYLE	SYYATSYLE	0.015546	2.4
HLA-A*30:01	162	1	9	9	RATRKYSDL	RATRKYSDL	RATRKYSDL	0.0155	6.5
HLA-B*07:02	82	1	9	9	GVPPKVVSY	GVPPKVVSY	GVPPKVVSY	0.015497	3.1
HLA-B*15:01	90	1	9	9	GPCPGDYAF	GPCPGDYAF	GPCPGDYAF	0.015483	4.3
HLA-B*58:01	55	1	9	9	FGAQHSTTL	FGAQHSTTL	FGAQHSTTL	0.015481	3.4
HLA-A*33:01	51	1	9	9	FLYDRLAST	FLYDRLAST	FLYDRLAST	0.015457	4.2
HLA-A*68:01	19	1	9	9	ILGSLGLRK	ILGSLGLRK	ILGSLGLRK	0.015457	5.9
HLA-A*30:02	129	1	9	9	KIDNNTFVR	KIDNNTFVR	KIDNNTFVR	0.015409	4.8
HLA-B*58:01	146	1	9	9	TTELRTYTI	TTELRTYTI	TTELRTYTI	0.015316	3.5
HLA-B*15:01	75	1	9	9	ITTAVKTVL	ITTAVKTVL	ITTAVKTVL	0.015313	4.4
HLA-A*02:03	44	1	9	9	KINQIIHDF	KINQIIHDF	KINQIIHDF	0.015283	4.6
HLA-A*32:01	40	1	9	9	SFFVWVIIL	SFFVWVIIL	SFFVWVIIL	0.015182	2.7
HLA-A*31:01	98	1	9	9	KAFSMPLGV	KAFSMPLGV	KAFSMPLGV	0.015046	5.3
HLA-A*30:02	53	1	9	9	LVPKNSPGM	LVPKNSPGM	LVPKNSPGM	0.015044	4.9
HLA-B*08:01	75	1	9	9	ITTAVKTVL	ITTAVKTVL	ITTAVKTVL	0.015021	4.7
HLA-A*33:01	173	1	9	9	SYYATSYLE	SYYATSYLE	SYYATSYLE	0.014994	4.3
HLA-B*51:01	124	1	9	9	LIWTLDANI	LIWTLDANI	LIWTLDANI	0.014966	4.7
HLA-A*26:01	168	1	9	9	QLKSVGLNL	QLKSVGLNL	QLKSVGLNL	0.014935	2.6
HLA-B*51:01	45	1	9	9	FQLNDTIHL	FQLNDTIHL	FQLNDTIHL	0.01493	4.8
HLA-B*08:01	20	1	9	9	TELRTYTIL	TELRTYTIL	TELRTYTIL	0.014865	4.8
HLA-B*58:01	61	1	9	9	ILNRKAIDF	ILNRKAIDF	ILNRKAIDF	0.014853	3.5
HLA-B*07:02	175	1	9	9	LPSQNSTEG	LPSQNSTEG	LPSQNSTEG	0.014811	3.2
HLA-A*30:02	45	1	9	9	FQLNDTIHL	FQLNDTIHL	FQLNDTIHL	0.014793	4.9
HLA-A*30:02	58	1	9	9	VIILFQKAF	VIILFQKAF	VIILFQKAF	0.01476	4.9
HLA-A*02:03	24	1	9	9	RLASTVIYR	RLASTVIYR	RLASTVIYR	0.014747	4.7
HLA-A*02:03	160	1	9	9	NQNALVCGL	NQNALVCGL	NQNALVCGL	0.014713	4.7
HLA-B*53:01	39	1	9	9	VPKNSPGMV	VPKNSPGMV	VPKNSPGMV	0.014713	2.7
HLA-A*30:01	47	1	9	9	RPHTPQFLF	RPHTPQFLF	RPHTPQFLF	0.014684	6.7
HLA-A*26:01	64	1	9	9	AGIAWIPYF	AGIAWIPYF	AGIAWIPYF	0.014627	2.6
HLA-A*68:02	118	1	9	9	KNSPGMVPL	KNSPGMVPL	KNSPGMVPL	0.014625	4.2
HLA-B*07:02	65	1	9	9	NFAEGVIAF	NFAEGVIAF	NFAEGVIAF	0.014596	3.2
HLA-B*51:01	177	1	9	9	LPRDKFRKS	LPRDKFRKS	LPRDKFRKS	0.014526	4.8
HLA-B*08:01	117	1	9	9	YLEYEIENF	YLEYEIENF	YLEYEIENF	0.014483	4.8
HLA-B*08:01	59	1	9	9	FAEGVIAFL	FAEGVIAFL	FAEGVIAFL	0.01448	4.8
HLA-A*32:01	48	1	9	9	LANETTQAL	LANETTQAL	LANETTQAL	0.014395	2.8
HLA-A*31:01	105	1	9	9	SSYYATSYL	SSYYATSYL	SSYYATSYL	0.014372	5.4
HLA-A*23:01	38	1	9	9	YAFHKDGAF	YAFHKDGAF	YAFHKDGAF	0.014356	2.4
HLA-B*08:01	100	1	9	9	HMQISTIGI	HMQISTIGI	HMQISTIGI	0.01432	4.8
HLA-A*30:01	131	1	9	9	ITSTVTGIL	ITSTVTGIL	ITSTVTGIL	0.014311	6.8
HLA-A*30:02	114	1	9	9	SQIPSSSPT	SQIPSSSPT	SQIPSSSPT	0.014209	5
HLA-A*32:01	131	1	9	9	ITSTVTGIL	ITSTVTGIL	ITSTVTGIL	0.014136	2.9
HLA-A*26:01	87	1	9	9	NADIGEWAF	NADIGEWAF	NADIGEWAF	0.014035	2.6
HLA-A*02:06	87	1	9	9	NADIGEWAF	NADIGEWAF	NADIGEWAF	0.014004	5.7
HLA-A*33:01	60	1	9	9	TVIYRGVNF	TVIYRGVNF	TVIYRGVNF	0.013997	4.4
HLA-B*40:01	47	1	9	9	RPHTPQFLF	RPHTPQFLF	RPHTPQFLF	0.013979	2.5
HLA-A*02:06	112	1	9	9	ETFLQSPPI	ETFLQSPPI	ETFLQSPPI	0.013926	5.7
HLA-B*07:02	34	1	9	9	SEQLRGEEL	SEQLRGEEL	SEQLRGEEL	0.013848	3.3
HLA-A*11:01	157	1	9	9	ITKGRISDR	ITKGRISDR	ITKGRISDR	0.013824	3.7
HLA-B*51:01	79	1	9	9	EGIYTEGLM	EGIYTEGLM	EGIYTEGLM	0.013822	5
HLA-A*01:01	48	1	9	9	LANETTQAL	LANETTQAL	LANETTQAL	0.013813	3.1
HLA-A*26:01	166	1	9	9	TTGRLIWTL	TTGRLIWTL	TTGRLIWTL	0.013805	2.7
HLA-A*03:01	44	1	9	9	KINQIIHDF	KINQIIHDF	KINQIIHDF	0.013747	4.1
HLA-A*11:01	105	1	9	9	SSYYATSYL	SSYYATSYL	SSYYATSYL	0.013694	3.7
HLA-B*51:01	65	1	9	9	NFAEGVIAF	NFAEGVIAF	NFAEGVIAF	0.013585	5
HLA-B*07:02	163	1	9	9	YTILNRKAI	YTILNRKAI	YTILNRKAI	0.013578	3.3
HLA-A*26:01	113	1	9	9	TTQALQLFL	TTQALQLFL	TTQALQLFL	0.013555	2.7
HLA-B*57:01	12	1	9	9	FFVWVIILF	FFVWVIILF	FFVWVIILF	0.013539	5.4
HLA-B*58:01	65	1	9	9	NFAEGVIAF	NFAEGVIAF	NFAEGVIAF	0.013467	3.7
HLA-B*08:01	8	1	9	9	IHDFIDNPL	IHDFIDNPL	IHDFIDNPL	0.013445	5
HLA-A*30:02	19	1	9	9	ILGSLGLRK	ILGSLGLRK	ILGSLGLRK	0.013411	5.2
HLA-B*58:01	59	1	9	9	FAEGVIAFL	FAEGVIAFL	FAEGVIAFL	0.013352	3.7
HLA-B*53:01	83	1	9	9	ILFQKAFSM	ILFQKAFSM	ILFQKAFSM	0.013278	2.9
HLA-B*44:02	132	1	9	9	RATTELRTY	RATTELRTY	RATTELRTY	0.013238	2.3
HLA-A*11:01	3	1	9	9	ISDRATRKY	ISDRATRKY	ISDRATRKY	0.013236	3.8
HLA-A*24:02	122	1	9	9	WWTGWRQWI	WWTGWRQWI	WWTGWRQWI	0.013214	2.6
HLA-A*02:06	4	1	9	9	FHKDGAFFL	FHKDGAFFL	FHKDGAFFL	0.013165	5.9
HLA-A*32:01	123	1	9	9	VVTNSTLEV	VVTNSTLEV	VVTNSTLEV	0.013149	3
HLA-B*51:01	86	1	9	9	DHLASTDQL	DHLASTDQL	DHLASTDQL	0.013125	5.1
HLA-B*57:01	59	1	9	9	FAEGVIAFL	FAEGVIAFL	FAEGVIAFL	0.013106	5.5
HLA-A*30:01	166	1	9	9	TTGRLIWTL	TTGRLIWTL	TTGRLIWTL	0.013076	7.2
HLA-A*33:01	30	1	9	9	VIAFLILAK	VIAFLILAK	VIAFLILAK	0.012966	4.6
HLA-A*30:02	134	1	9	9	TTPENITTA	TTPENITTA	TTPENITTA	0.012942	5.3
HLA-A*02:03	53	1	9	9	LVPKNSPGM	LVPKNSPGM	LVPKNSPGM	0.012881	5
HLA-A*24:02	46	1	9	9	DTIHLHQQL	DTIHLHQQL	DTIHLHQQL	0.012877	2.6
HLA-A*01:01	66	1	9	9	ILAKPKETF	ILAKPKETF	ILAKPKETF	0.012662	3.3
HLA-B*51:01	125	1	9	9	GAQHSTTLF	GAQHSTTLF	GAQHSTTLF	0.012632	5.2
HLA-B*35:01	64	1	9	9	AGIAWIPYF	AGIAWIPYF	AGIAWIPYF	0.012603	3.3
HLA-B*53:01	28	1	9	9	ITDKINQII	ITDKINQII	ITDKINQII	0.012561	3
HLA-A*02:03	166	1	9	9	TTGRLIWTL	TTGRLIWTL	TTGRLIWTL	0.012509	5.1
HLA-A*02:06	108	1	9	9	LYDRLASTV	LYDRLASTV	LYDRLASTV	0.012507	6.1
HLA-A*31:01	173	1	9	9	SYYATSYLE	SYYATSYLE	SYYATSYLE	0.012451	5.8
HLA-A*02:03	117	1	9	9	YLEYEIENF	YLEYEIENF	YLEYEIENF	0.012422	5.1
HLA-B*53:01	58	1	9	9	VIILFQKAF	VIILFQKAF	VIILFQKAF	0.012383	3
HLA-B*35:01	105	1	9	9	SSYYATSYL	SSYYATSYL	SSYYATSYL	0.012343	3.3
HLA-B*51:01	60	1	9	9	TVIYRGVNF	TVIYRGVNF	TVIYRGVNF	0.012324	5.3
HLA-B*57:01	162	1	9	9	RATRKYSDL	RATRKYSDL	RATRKYSDL	0.012313	5.7
HLA-A*02:06	38	1	9	9	YAFHKDGAF	YAFHKDGAF	YAFHKDGAF	0.012293	6.2
HLA-B*51:01	53	1	9	9	LVPKNSPGM	LVPKNSPGM	LVPKNSPGM	0.012287	5.3
HLA-B*15:01	27	1	9	9	VVSYEAGEW	VVSYEAGEW	VVSYEAGEW	0.012235	4.8
HLA-B*51:01	145	1	9	9	FKIDNNTFV	FKIDNNTFV	FKIDNNTFV	0.012229	5.3
HLA-A*30:02	150	1	9	9	FRKSSFFVW	FRKSSFFVW	FRKSSFFVW	0.012225	5.5
HLA-A*30:02	75	1	9	9	ITTAVKTVL	ITTAVKTVL	ITTAVKTVL	0.012209	5.5
HLA-B*08:01	52	1	9	9	IIIAIIALL	IIIAIIALL	IIIAIIALL	0.012208	5.3
HLA-A*31:01	15	1	9	9	KCNPNLHYW	KCNPNLHYW	KCNPNLHYW	0.01215	5.8
HLA-A*31:01	166	1	9	9	TTGRLIWTL	TTGRLIWTL	TTGRLIWTL	0.012146	5.8
HLA-B*53:01	113	1	9	9	TTQALQLFL	TTQALQLFL	TTQALQLFL	0.012145	3
HLA-A*02:01	36	1	9	9	QLRGEELSF	QLRGEELSF	QLRGEELSF	0.012137	4.5
HLA-B*51:01	66	1	9	9	ILAKPKETF	ILAKPKETF	ILAKPKETF	0.012114	5.4
HLA-B*08:01	144	1	9	9	GIIIAIIAL	GIIIAIIAL	GIIIAIIAL	0.01206	5.4
HLA-B*07:02	26	1	9	9	FQKAFSMPL	FQKAFSMPL	FQKAFSMPL	0.012041	3.5
HLA-A*30:02	184	1	9	9	QHNAAGIAW	QHNAAGIAW	QHNAAGIAW	0.012017	5.6
HLA-A*24:02	142	1	9	9	HIPEGETTL	HIPEGETTL	HIPEGETTL	0.012012	2.7
HLA-B*58:01	90	1	9	9	GPCPGDYAF	GPCPGDYAF	GPCPGDYAF	0.012005	3.9
HLA-B*44:02	65	1	9	9	NFAEGVIAF	NFAEGVIAF	NFAEGVIAF	0.011949	2.4
HLA-B*15:01	15	1	9	9	KCNPNLHYW	KCNPNLHYW	KCNPNLHYW	0.011938	4.9
HLA-A*32:01	11	1	9	9	HKDGAFFLY	HKDGAFFLY	HKDGAFFLY	0.011916	3.2
HLA-A*03:01	81	1	9	9	VWVIILFQK	VWVIILFQK	VWVIILFQK	0.01187	4.4
HLA-A*02:03	131	1	9	9	ITSTVTGIL	ITSTVTGIL	ITSTVTGIL	0.011865	5.2
HLA-A*30:01	52	1	9	9	IIIAIIALL	IIIAIIALL	IIIAIIALL	0.011827	7.7
HLA-B*44:02	9	1	9	9	ETTQALQLF	ETTQALQLF	ETTQALQLF	0.011763	2.5
HLA-B*08:01	160	1	9	9	NQNALVCGL	NQNALVCGL	NQNALVCGL	0.011762	5.5
HLA-A*03:01	1	1	9	9	YTENTSSYY	YTENTSSYY	YTENTSSYY	0.011753	4.4
HLA-A*32:01	55	1	9	9	FGAQHSTTL	FGAQHSTTL	FGAQHSTTL	0.011692	3.2
HLA-A*01:01	105	1	9	9	SSYYATSYL	SSYYATSYL	SSYYATSYL	0.011674	3.5
HLA-B*07:02	49	1	9	9	THTSGPSVM	THTSGPSVM	THTSGPSVM	0.011672	3.6
HLA-A*30:02	143	1	9	9	TVTGILGSL	TVTGILGSL	TVTGILGSL	0.011669	5.7
HLA-B*15:01	52	1	9	9	IIIAIIALL	IIIAIIALL	IIIAIIALL	0.011613	4.9
HLA-A*68:01	112	1	9	9	ETFLQSPPI	ETFLQSPPI	ETFLQSPPI	0.011459	6.6
HLA-A*68:01	81	1	9	9	VWVIILFQK	VWVIILFQK	VWVIILFQK	0.011437	6.6
HLA-B*15:01	51	1	9	9	FLYDRLAST	FLYDRLAST	FLYDRLAST	0.0114	5
HLA-A*30:02	28	1	9	9	ITDKINQII	ITDKINQII	ITDKINQII	0.011342	5.8
HLA-A*02:06	11	1	9	9	HKDGAFFLY	HKDGAFFLY	HKDGAFFLY	0.011326	6.4
HLA-A*02:06	119	1	9	9	QWIPAGIGI	QWIPAGIGI	QWIPAGIGI	0.011318	6.4
HLA-B*57:01	118	1	9	9	KNSPGMVPL	KNSPGMVPL	KNSPGMVPL	0.011303	6
HLA-A*01:01	46	1	9	9	DTIHLHQQL	DTIHLHQQL	DTIHLHQQL	0.011243	3.6
HLA-B*58:01	52	1	9	9	IIIAIIALL	IIIAIIALL	IIIAIIALL	0.011238	4
HLA-A*30:01	120	1	9	9	LFLRATTEL	LFLRATTEL	LFLRATTEL	0.011124	7.9
HLA-A*30:02	32	1	9	9	HLASTDQLK	HLASTDQLK	HLASTDQLK	0.011118	5.9
HLA-B*53:01	45	1	9	9	FQLNDTIHL	FQLNDTIHL	FQLNDTIHL	0.011085	3.1
HLA-A*03:01	3	1	9	9	ISDRATRKY	ISDRATRKY	ISDRATRKY	0.011066	4.5
HLA-A*30:02	27	1	9	9	VVSYEAGEW	VVSYEAGEW	VVSYEAGEW	0.01103	5.9
HLA-A*02:03	75	1	9	9	ITTAVKTVL	ITTAVKTVL	ITTAVKTVL	0.011013	5.4
HLA-A*26:01	84	1	9	9	AFHKDGAFF	AFHKDGAFF	AFHKDGAFF	0.010933	3
HLA-A*03:01	98	1	9	9	KAFSMPLGV	KAFSMPLGV	KAFSMPLGV	0.010925	4.5
HLA-A*26:01	12	1	9	9	FFVWVIILF	FFVWVIILF	FFVWVIILF	0.01092	3
HLA-A*68:02	4	1	9	9	FHKDGAFFL	FHKDGAFFL	FHKDGAFFL	0.010913	4.8
HLA-B*15:01	99	1	9	9	TIIGTNGNH	TIIGTNGNH	TIIGTNGNH	0.010887	5.1
HLA-A*68:02	119	1	9	9	QWIPAGIGI	QWIPAGIGI	QWIPAGIGI	0.010884	4.8
HLA-B*44:02	130	1	9	9	NINADIGEW	NINADIGEW	NINADIGEW	0.01087	2.6
HLA-A*01:01	147	1	9	9	EIENFGAQH	EIENFGAQH	EIENFGAQH	0.010845	3.6
HLA-B*53:01	64	1	9	9	AGIAWIPYF	AGIAWIPYF	AGIAWIPYF	0.010808	3.2
HLA-B*08:01	90	1	9	9	GPCPGDYAF	GPCPGDYAF	GPCPGDYAF	0.010801	5.8
HLA-A*30:02	18	1	9	9	KSSFFVWVI	KSSFFVWVI	KSSFFVWVI	0.010765	6
HLA-A*32:01	112	1	9	9	ETFLQSPPI	ETFLQSPPI	ETFLQSPPI	0.010757	3.3
HLA-B*58:01	17	1	9	9	RTYTILNRK	RTYTILNRK	RTYTILNRK	0.010698	4.1
HLA-A*26:01	125	1	9	9	GAQHSTTLF	GAQHSTTLF	GAQHSTTLF	0.010695	3.1
HLA-A*68:02	83	1	9	9	ILFQKAFSM	ILFQKAFSM	ILFQKAFSM	0.010669	4.9
HLA-A*68:02	100	1	9	9	HMQISTIGI	HMQISTIGI	HMQISTIGI	0.010668	4.9
HLA-B*35:01	84	1	9	9	AFHKDGAFF	AFHKDGAFF	AFHKDGAFF	0.010662	3.6
HLA-A*32:01	124	1	9	9	LIWTLDANI	LIWTLDANI	LIWTLDANI	0.01062	3.4
HLA-B*51:01	29	1	9	9	NETTQALQL	NETTQALQL	NETTQALQL	0.010618	5.8
HLA-A*32:01	119	1	9	9	QWIPAGIGI	QWIPAGIGI	QWIPAGIGI	0.010611	3.4
HLA-A*23:01	18	1	9	9	KSSFFVWVI	KSSFFVWVI	KSSFFVWVI	0.010572	2.8
HLA-A*02:06	37	1	9	9	AQHSTTLFK	AQHSTTLFK	AQHSTTLFK	0.010558	6.7
HLA-B*57:01	168	1	9	9	QLKSVGLNL	QLKSVGLNL	QLKSVGLNL	0.010521	6.2
HLA-A*31:01	71	1	9	9	IIALLCVCK	IIALLCVCK	IIALLCVCK	0.010504	6.2
HLA-A*01:01	44	1	9	9	KINQIIHDF	KINQIIHDF	KINQIIHDF	0.010492	3.7
HLA-A*23:01	122	1	9	9	WWTGWRQWI	WWTGWRQWI	WWTGWRQWI	0.010486	2.8
HLA-A*11:01	5	1	9	9	YYATSYLEY	YYATSYLEY	YYATSYLEY	0.010452	4.1
HLA-B*58:01	97	1	9	9	AAGIAWIPY	AAGIAWIPY	AAGIAWIPY	0.01042	4.2
HLA-A*68:01	65	1	9	9	NFAEGVIAF	NFAEGVIAF	NFAEGVIAF	0.0104	6.8
HLA-A*33:01	40	1	9	9	SFFVWVIIL	SFFVWVIIL	SFFVWVIIL	0.010398	5
HLA-A*02:06	136	1	9	9	ALLCVCKLL	ALLCVCKLL	ALLCVCKLL	0.010306	6.8
HLA-A*32:01	41	1	9	9	RSRRQTNTK	RSRRQTNTK	RSRRQTNTK	0.010286	3.5
HLA-B*40:01	48	1	9	9	LANETTQAL	LANETTQAL	LANETTQAL	0.010285	2.8
HLA-B*51:01	63	1	9	9	LMHNQNALV	LMHNQNALV	LMHNQNALV	0.010278	5.9
HLA-B*07:02	44	1	9	9	KINQIIHDF	KINQIIHDF	KINQIIHDF	0.010257	3.8
HLA-A*68:01	101	1	9	9	SLLQLPRDK	SLLQLPRDK	SLLQLPRDK	0.010232	6.8
HLA-B*57:01	90	1	9	9	GPCPGDYAF	GPCPGDYAF	GPCPGDYAF	0.01023	6.2
HLA-A*30:02	130	1	9	9	NINADIGEW	NINADIGEW	NINADIGEW	0.010197	6.2
HLA-A*68:02	72	1	9	9	SPGMVPLHI	SPGMVPLHI	SPGMVPLHI	0.010173	5
HLA-B*07:02	144	1	9	9	GIIIAIIAL	GIIIAIIAL	GIIIAIIAL	0.010168	3.8
HLA-A*23:01	142	1	9	9	HIPEGETTL	HIPEGETTL	HIPEGETTL	0.010161	2.9
HLA-A*30:01	85	1	9	9	GILGSLGLR	GILGSLGLR	GILGSLGLR	0.010141	8.3
HLA-A*24:02	18	1	9	9	KSSFFVWVI	KSSFFVWVI	KSSFFVWVI	0.010107	2.9
HLA-B*44:03	170	1	9	9	QLNDTIHLH	QLNDTIHLH	QLNDTIHLH	0.010096	2.8
HLA-B*44:02	170	1	9	9	QLNDTIHLH	QLNDTIHLH	QLNDTIHLH	0.010082	2.6
HLA-A*03:01	105	1	9	9	SSYYATSYL	SSYYATSYL	SSYYATSYL	0.009999	4.7
HLA-B*51:01	5	1	9	9	YYATSYLEY	YYATSYLEY	YYATSYLEY	0.009996	6
HLA-A*03:01	5	1	9	9	YYATSYLEY	YYATSYLEY	YYATSYLEY	0.009979	4.7
HLA-A*32:01	144	1	9	9	GIIIAIIAL	GIIIAIIAL	GIIIAIIAL	0.009977	3.5
HLA-A*03:01	99	1	9	9	TIIGTNGNH	TIIGTNGNH	TIIGTNGNH	0.009972	4.7
HLA-B*57:01	55	1	9	9	FGAQHSTTL	FGAQHSTTL	FGAQHSTTL	0.00997	6.3
HLA-B*51:01	120	1	9	9	LFLRATTEL	LFLRATTEL	LFLRATTEL	0.009965	6
HLA-B*07:02	108	1	9	9	LYDRLASTV	LYDRLASTV	LYDRLASTV	0.009964	3.9
HLA-B*57:01	65	1	9	9	NFAEGVIAF	NFAEGVIAF	NFAEGVIAF	0.009947	6.3
HLA-B*15:01	130	1	9	9	NINADIGEW	NINADIGEW	NINADIGEW	0.009934	5.3
HLA-B*15:01	34	1	9	9	SEQLRGEEL	SEQLRGEEL	SEQLRGEEL	0.009892	5.3
HLA-A*32:01	30	1	9	9	VIAFLILAK	VIAFLILAK	VIAFLILAK	0.009885	3.5
HLA-A*30:02	73	1	9	9	QTNTKATGK	QTNTKATGK	QTNTKATGK	0.009881	6.3
HLA-A*30:01	48	1	9	9	LANETTQAL	LANETTQAL	LANETTQAL	0.009867	8.4
HLA-B*51:01	143	1	9	9	TVTGILGSL	TVTGILGSL	TVTGILGSL	0.00984	6.1
HLA-A*32:01	84	1	9	9	AFHKDGAFF	AFHKDGAFF	AFHKDGAFF	0.009834	3.5
HLA-B*53:01	105	1	9	9	SSYYATSYL	SSYYATSYL	SSYYATSYL	0.009776	3.3
HLA-B*07:02	125	1	9	9	GAQHSTTLF	GAQHSTTLF	GAQHSTTLF	0.009771	3.9
HLA-B*35:01	12	1	9	9	FFVWVIILF	FFVWVIILF	FFVWVIILF	0.009735	3.8
HLA-A*32:01	120	1	9	9	LFLRATTEL	LFLRATTEL	LFLRATTEL	0.009727	3.5
HLA-B*08:01	53	1	9	9	LVPKNSPGM	LVPKNSPGM	LVPKNSPGM	0.009692	6.1
HLA-B*53:01	166	1	9	9	TTGRLIWTL	TTGRLIWTL	TTGRLIWTL	0.009674	3.3
HLA-A*02:06	35	1	9	9	LEVTEIDQL	LEVTEIDQL	LEVTEIDQL	0.009656	7
HLA-A*30:01	163	1	9	9	YTILNRKAI	YTILNRKAI	YTILNRKAI	0.00962	8.6
HLA-A*02:06	131	1	9	9	ITSTVTGIL	ITSTVTGIL	ITSTVTGIL	0.009573	7
HLA-A*30:02	109	1	9	9	GLMHNQNAL	GLMHNQNAL	GLMHNQNAL	0.009559	6.4
HLA-A*68:02	93	1	9	9	STDIPSATK	STDIPSATK	STDIPSATK	0.009549	5.2
HLA-A*02:03	28	1	9	9	ITDKINQII	ITDKINQII	ITDKINQII	0.009546	5.8
HLA-B*15:01	184	1	9	9	QHNAAGIAW	QHNAAGIAW	QHNAAGIAW	0.00952	5.4
HLA-A*02:01	53	1	9	9	LVPKNSPGM	LVPKNSPGM	LVPKNSPGM	0.009513	5.1
HLA-A*30:02	166	1	9	9	TTGRLIWTL	TTGRLIWTL	TTGRLIWTL	0.009496	6.5
HLA-A*02:06	70	1	9	9	ETAATIIGT	ETAATIIGT	ETAATIIGT	0.009458	7.1
HLA-B*15:01	100	1	9	9	HMQISTIGI	HMQISTIGI	HMQISTIGI	0.009423	5.4
HLA-B*53:01	142	1	9	9	HIPEGETTL	HIPEGETTL	HIPEGETTL	0.009384	3.4
HLA-A*32:01	93	1	9	9	STDIPSATK	STDIPSATK	STDIPSATK	0.009314	3.6
HLA-B*51:01	58	1	9	9	VIILFQKAF	VIILFQKAF	VIILFQKAF	0.009308	6.3
HLA-A*68:01	113	1	9	9	TTQALQLFL	TTQALQLFL	TTQALQLFL	0.009303	7.1
HLA-A*01:01	176	1	9	9	LLQLPRDKF	LLQLPRDKF	LLQLPRDKF	0.009245	4
HLA-A*01:01	36	1	9	9	QLRGEELSF	QLRGEELSF	QLRGEELSF	0.009239	4
HLA-A*30:02	87	1	9	9	NADIGEWAF	NADIGEWAF	NADIGEWAF	0.009237	6.6
HLA-A*23:01	52	1	9	9	IIIAIIALL	IIIAIIALL	IIIAIIALL	0.009231	3
HLA-A*68:02	38	1	9	9	YAFHKDGAF	YAFHKDGAF	YAFHKDGAF	0.009222	5.3
HLA-A*30:02	4	1	9	9	FHKDGAFFL	FHKDGAFFL	FHKDGAFFL	0.009058	6.7
HLA-B*53:01	112	1	9	9	ETFLQSPPI	ETFLQSPPI	ETFLQSPPI	0.009039	3.5
HLA-A*03:01	168	1	9	9	QLKSVGLNL	QLKSVGLNL	QLKSVGLNL	0.009025	4.9
HLA-A*02:01	114	1	9	9	SQIPSSSPT	SQIPSSSPT	SQIPSSSPT	0.009015	5.2
HLA-B*07:02	59	1	9	9	FAEGVIAFL	FAEGVIAFL	FAEGVIAFL	0.008985	4
HLA-B*44:03	9	1	9	9	ETTQALQLF	ETTQALQLF	ETTQALQLF	0.008981	3
HLA-B*51:01	100	1	9	9	HMQISTIGI	HMQISTIGI	HMQISTIGI	0.00898	6.4
HLA-B*07:02	131	1	9	9	ITSTVTGIL	ITSTVTGIL	ITSTVTGIL	0.008973	4.1
HLA-B*44:03	132	1	9	9	RATTELRTY	RATTELRTY	RATTELRTY	0.008946	3
HLA-A*11:01	97	1	9	9	AAGIAWIPY	AAGIAWIPY	AAGIAWIPY	0.00894	4.3
HLA-A*31:01	118	1	9	9	KNSPGMVPL	KNSPGMVPL	KNSPGMVPL	0.008936	6.7
HLA-B*35:01	176	1	9	9	LLQLPRDKF	LLQLPRDKF	LLQLPRDKF	0.008922	3.9
HLA-A*30:01	2	1	9	9	TSSYYATSY	TSSYYATSY	TSSYYATSY	0.008897	8.9
HLA-A*30:02	12	1	9	9	FFVWVIILF	FFVWVIILF	FFVWVIILF	0.008858	6.8
HLA-A*30:01	146	1	9	9	TTELRTYTI	TTELRTYTI	TTELRTYTI	0.008811	9
HLA-B*07:02	46	1	9	9	DTIHLHQQL	DTIHLHQQL	DTIHLHQQL	0.008802	4.1
HLA-B*53:01	4	1	9	9	FHKDGAFFL	FHKDGAFFL	FHKDGAFFL	0.008792	3.5
HLA-A*02:01	105	1	9	9	SSYYATSYL	SSYYATSYL	SSYYATSYL	0.008781	5.3
HLA-A*30:01	3	1	9	9	ISDRATRKY	ISDRATRKY	ISDRATRKY	0.008743	9
HLA-B*57:01	110	1	9	9	ITETAATII	ITETAATII	ITETAATII	0.008681	6.8
HLA-A*30:01	11	1	9	9	HKDGAFFLY	HKDGAFFLY	HKDGAFFLY	0.008583	9.1
HLA-A*02:01	160	1	9	9	NQNALVCGL	NQNALVCGL	NQNALVCGL	0.008571	5.3
HLA-B*44:03	65	1	9	9	NFAEGVIAF	NFAEGVIAF	NFAEGVIAF	0.00856	3.1
HLA-A*02:03	46	1	9	9	DTIHLHQQL	DTIHLHQQL	DTIHLHQQL	0.008532	6.2
HLA-A*30:02	117	1	9	9	YLEYEIENF	YLEYEIENF	YLEYEIENF	0.008526	6.9
HLA-A*11:01	81	1	9	9	VWVIILFQK	VWVIILFQK	VWVIILFQK	0.008477	4.4
HLA-B*53:01	75	1	9	9	ITTAVKTVL	ITTAVKTVL	ITTAVKTVL	0.008464	3.6
HLA-B*51:01	119	1	9	9	QWIPAGIGI	QWIPAGIGI	QWIPAGIGI	0.008435	6.6
HLA-A*02:01	18	1	9	9	KSSFFVWVI	KSSFFVWVI	KSSFFVWVI	0.008388	5.4
HLA-B*08:01	49	1	9	9	THTSGPSVM	THTSGPSVM	THTSGPSVM	0.008373	6.6
HLA-B*35:01	143	1	9	9	TVTGILGSL	TVTGILGSL	TVTGILGSL	0.008365	4
HLA-A*31:01	174	1	9	9	GIYTEGLMH	GIYTEGLMH	GIYTEGLMH	0.008336	6.9
HLA-A*68:02	69	1	9	9	EWAENCYNL	EWAENCYNL	EWAENCYNL	0.008331	5.6
HLA-A*24:02	38	1	9	9	YAFHKDGAF	YAFHKDGAF	YAFHKDGAF	0.008315	3.2
HLA-B*51:01	26	1	9	9	FQKAFSMPL	FQKAFSMPL	FQKAFSMPL	0.008314	6.7
HLA-B*40:01	160	1	9	9	NQNALVCGL	NQNALVCGL	NQNALVCGL	0.008292	3.1
HLA-B*35:01	148	1	9	9	SPTTAPSPE	SPTTAPSPE	SPTTAPSPE	0.008292	4
HLA-A*26:01	79	1	9	9	EGIYTEGLM	EGIYTEGLM	EGIYTEGLM	0.008263	3.6
HLA-A*31:01	168	1	9	9	QLKSVGLNL	QLKSVGLNL	QLKSVGLNL	0.008243	6.9
HLA-A*68:01	11	1	9	9	HKDGAFFLY	HKDGAFFLY	HKDGAFFLY	0.008232	7.4
HLA-A*02:03	163	1	9	9	YTILNRKAI	YTILNRKAI	YTILNRKAI	0.008231	6.3
HLA-B*07:02	53	1	9	9	LVPKNSPGM	LVPKNSPGM	LVPKNSPGM	0.008207	4.2
HLA-A*30:02	171	1	9	9	TQALQLFLR	TQALQLFLR	TQALQLFLR	0.008123	7.2
HLA-B*44:03	179	1	9	9	NYTENTSSY	NYTENTSSY	NYTENTSSY	0.008092	3.1
HLA-A*01:01	38	1	9	9	YAFHKDGAF	YAFHKDGAF	YAFHKDGAF	0.008081	4.2
HLA-A*32:01	142	1	9	9	HIPEGETTL	HIPEGETTL	HIPEGETTL	0.008075	3.9
HLA-A*30:01	174	1	9	9	GIYTEGLMH	GIYTEGLMH	GIYTEGLMH	0.008036	9.5
HLA-B*53:01	176	1	9	9	LLQLPRDKF	LLQLPRDKF	LLQLPRDKF	0.008021	3.7
HLA-B*44:03	5	1	9	9	YYATSYLEY	YYATSYLEY	YYATSYLEY	0.00802	3.2
HLA-A*68:02	45	1	9	9	FQLNDTIHL	FQLNDTIHL	FQLNDTIHL	0.008004	5.7
HLA-A*68:02	31	1	9	9	IPSSSPTTA	IPSSSPTTA	IPSSSPTTA	0.007999	5.7
HLA-A*26:01	93	1	9	9	STDIPSATK	STDIPSATK	STDIPSATK	0.007967	3.7
HLA-B*15:01	143	1	9	9	TVTGILGSL	TVTGILGSL	TVTGILGSL	0.007942	5.8
HLA-B*35:01	29	1	9	9	NETTQALQL	NETTQALQL	NETTQALQL	0.007928	4.1
HLA-A*24:02	28	1	9	9	ITDKINQII	ITDKINQII	ITDKINQII	0.007898	3.3
HLA-B*35:01	27	1	9	9	VVSYEAGEW	VVSYEAGEW	VVSYEAGEW	0.007883	4.1
HLA-B*08:01	84	1	9	9	AFHKDGAFF	AFHKDGAFF	AFHKDGAFF	0.007844	6.9
HLA-B*35:01	75	1	9	9	ITTAVKTVL	ITTAVKTVL	ITTAVKTVL	0.007786	4.1
HLA-A*31:01	40	1	9	9	SFFVWVIIL	SFFVWVIIL	SFFVWVIIL	0.007783	7.1
HLA-B*08:01	28	1	9	9	ITDKINQII	ITDKINQII	ITDKINQII	0.007783	6.9
HLA-B*08:01	112	1	9	9	ETFLQSPPI	ETFLQSPPI	ETFLQSPPI	0.007758	6.9
HLA-A*30:01	150	1	9	9	FRKSSFFVW	FRKSSFFVW	FRKSSFFVW	0.007743	9.7
HLA-A*32:01	1	1	9	9	YTENTSSYY	YTENTSSYY	YTENTSSYY	0.007741	4
HLA-B*35:01	134	1	9	9	TTPENITTA	TTPENITTA	TTPENITTA	0.007738	4.2
HLA-B*58:01	110	1	9	9	ITETAATII	ITETAATII	ITETAATII	0.007701	4.9
HLA-A*11:01	180	1	9	9	FLRATTELR	FLRATTELR	FLRATTELR	0.007678	4.6
HLA-A*30:02	49	1	9	9	THTSGPSVM	THTSGPSVM	THTSGPSVM	0.007676	7.4
HLA-B*08:01	7	1	9	9	GEELSFEAL	GEELSFEAL	GEELSFEAL	0.007675	6.9
HLA-A*68:02	65	1	9	9	NFAEGVIAF	NFAEGVIAF	NFAEGVIAF	0.007649	5.8
HLA-A*30:01	144	1	9	9	GIIIAIIAL	GIIIAIIAL	GIIIAIIAL	0.007638	9.8
HLA-A*01:01	108	1	9	9	LYDRLASTV	LYDRLASTV	LYDRLASTV	0.007578	4.4
HLA-B*08:01	63	1	9	9	LMHNQNALV	LMHNQNALV	LMHNQNALV	0.007568	7
HLA-A*26:01	15	1	9	9	KCNPNLHYW	KCNPNLHYW	KCNPNLHYW	0.007545	3.8
HLA-A*30:01	143	1	9	9	TVTGILGSL	TVTGILGSL	TVTGILGSL	0.007528	9.9
HLA-A*32:01	140	1	9	9	KFRKSSFFV	KFRKSSFFV	KFRKSSFFV	0.00752	4
HLA-B*51:01	132	1	9	9	RATTELRTY	RATTELRTY	RATTELRTY	0.007513	7
HLA-A*24:02	53	1	9	9	LVPKNSPGM	LVPKNSPGM	LVPKNSPGM	0.007508	3.4
HLA-A*30:02	100	1	9	9	HMQISTIGI	HMQISTIGI	HMQISTIGI	0.007494	7.5
HLA-B*58:01	162	1	9	9	RATRKYSDL	RATRKYSDL	RATRKYSDL	0.007475	4.9
HLA-B*08:01	143	1	9	9	TVTGILGSL	TVTGILGSL	TVTGILGSL	0.007459	7
HLA-A*02:03	124	1	9	9	LIWTLDANI	LIWTLDANI	LIWTLDANI	0.007448	6.6
HLA-A*30:02	108	1	9	9	LYDRLASTV	LYDRLASTV	LYDRLASTV	0.007435	7.6
HLA-A*02:01	75	1	9	9	ITTAVKTVL	ITTAVKTVL	ITTAVKTVL	0.007407	5.8
HLA-A*33:01	9	1	9	9	ETTQALQLF	ETTQALQLF	ETTQALQLF	0.007401	5.8
HLA-A*02:06	120	1	9	9	LFLRATTEL	LFLRATTEL	LFLRATTEL	0.007384	8.1
HLA-A*26:01	13	1	9	9	GTGPCPGDY	GTGPCPGDY	GTGPCPGDY	0.00736	3.8
HLA-A*30:02	173	1	9	9	SYYATSYLE	SYYATSYLE	SYYATSYLE	0.007314	7.6
HLA-A*30:02	101	1	9	9	SLLQLPRDK	SLLQLPRDK	SLLQLPRDK	0.007295	7.6
HLA-A*26:01	51	1	9	9	FLYDRLAST	FLYDRLAST	FLYDRLAST	0.00726	3.9
HLA-A*30:02	26	1	9	9	FQKAFSMPL	FQKAFSMPL	FQKAFSMPL	0.007247	7.7
HLA-A*32:01	23	1	9	9	RISDRATRK	RISDRATRK	RISDRATRK	0.007236	4.1
HLA-B*35:01	15	1	9	9	KCNPNLHYW	KCNPNLHYW	KCNPNLHYW	0.007235	4.3
HLA-A*68:02	124	1	9	9	LIWTLDANI	LIWTLDANI	LIWTLDANI	0.007234	6
HLA-B*44:02	3	1	9	9	ISDRATRKY	ISDRATRKY	ISDRATRKY	0.007228	3.1
HLA-A*33:01	71	1	9	9	IIALLCVCK	IIALLCVCK	IIALLCVCK	0.007206	5.9
HLA-A*02:06	15	1	9	9	KCNPNLHYW	KCNPNLHYW	KCNPNLHYW	0.0072	8.2
HLA-A*02:06	34	1	9	9	SEQLRGEEL	SEQLRGEEL	SEQLRGEEL	0.007188	8.2
HLA-A*24:02	113	1	9	9	TTQALQLFL	TTQALQLFL	TTQALQLFL	0.007163	3.4
HLA-A*01:01	65	1	9	9	NFAEGVIAF	NFAEGVIAF	NFAEGVIAF	0.007139	4.5
HLA-A*02:06	1	1	9	9	YTENTSSYY	YTENTSSYY	YTENTSSYY	0.007088	8.2
HLA-A*02:03	113	1	9	9	TTQALQLFL	TTQALQLFL	TTQALQLFL	0.007085	6.7
HLA-A*30:02	157	1	9	9	ITKGRISDR	ITKGRISDR	ITKGRISDR	0.007059	7.8
HLA-A*30:02	55	1	9	9	FGAQHSTTL	FGAQHSTTL	FGAQHSTTL	0.00703	7.8
HLA-A*01:01	17	1	9	9	RTYTILNRK	RTYTILNRK	RTYTILNRK	0.007016	4.6
HLA-A*30:01	179	1	9	9	NYTENTSSY	NYTENTSSY	NYTENTSSY	0.007011	11
HLA-B*44:02	5	1	9	9	YYATSYLEY	YYATSYLEY	YYATSYLEY	0.006994	3.1
HLA-B*51:01	15	1	9	9	KCNPNLHYW	KCNPNLHYW	KCNPNLHYW	0.006986	7.3
HLA-B*53:01	98	1	9	9	KAFSMPLGV	KAFSMPLGV	KAFSMPLGV	0.006984	3.9
HLA-A*01:01	166	1	9	9	TTGRLIWTL	TTGRLIWTL	TTGRLIWTL	0.006981	4.6
HLA-B*35:01	126	1	9	9	HTPQFLFQL	HTPQFLFQL	HTPQFLFQL	0.006979	4.3
HLA-B*08:01	105	1	9	9	SSYYATSYL	SSYYATSYL	SSYYATSYL	0.006962	7.3
HLA-A*24:02	168	1	9	9	QLKSVGLNL	QLKSVGLNL	QLKSVGLNL	0.006961	3.5
HLA-B*35:01	4	1	9	9	FHKDGAFFL	FHKDGAFFL	FHKDGAFFL	0.006958	4.4
HLA-B*53:01	12	1	9	9	FFVWVIILF	FFVWVIILF	FFVWVIILF	0.006943	3.9
HLA-A*68:01	52	1	9	9	IIIAIIALL	IIIAIIALL	IIIAIIALL	0.006941	7.8
HLA-B*58:01	12	1	9	9	FFVWVIILF	FFVWVIILF	FFVWVIILF	0.006923	5.1
HLA-B*58:01	93	1	9	9	STDIPSATK	STDIPSATK	STDIPSATK	0.00692	5.1
HLA-B*08:01	140	1	9	9	KFRKSSFFV	KFRKSSFFV	KFRKSSFFV	0.006919	7.3
HLA-B*44:02	66	1	9	9	ILAKPKETF	ILAKPKETF	ILAKPKETF	0.006905	3.2
HLA-A*30:01	97	1	9	9	AAGIAWIPY	AAGIAWIPY	AAGIAWIPY	0.006868	11
HLA-B*51:01	82	1	9	9	GVPPKVVSY	GVPPKVVSY	GVPPKVVSY	0.00685	7.3
HLA-A*31:01	132	1	9	9	RATTELRTY	RATTELRTY	RATTELRTY	0.006822	7.4
HLA-A*30:02	142	1	9	9	HIPEGETTL	HIPEGETTL	HIPEGETTL	0.006807	8
HLA-A*30:01	66	1	9	9	ILAKPKETF	ILAKPKETF	ILAKPKETF	0.006796	11
HLA-A*26:01	17	1	9	9	RTYTILNRK	RTYTILNRK	RTYTILNRK	0.006782	4
HLA-A*31:01	66	1	9	9	ILAKPKETF	ILAKPKETF	ILAKPKETF	0.006759	7.5
HLA-B*53:01	29	1	9	9	NETTQALQL	NETTQALQL	NETTQALQL	0.006745	4
HLA-A*32:01	90	1	9	9	GPCPGDYAF	GPCPGDYAF	GPCPGDYAF	0.006744	4.3
HLA-B*15:01	126	1	9	9	HTPQFLFQL	HTPQFLFQL	HTPQFLFQL	0.006729	6.3
HLA-B*40:01	11	1	9	9	HKDGAFFLY	HKDGAFFLY	HKDGAFFLY	0.006675	3.3
HLA-A*33:01	12	1	9	9	FFVWVIILF	FFVWVIILF	FFVWVIILF	0.006672	6
HLA-B*58:01	163	1	9	9	YTILNRKAI	YTILNRKAI	YTILNRKAI	0.006644	5.2
HLA-A*30:01	141	1	9	9	GITGIIIAI	GITGIIIAI	GITGIIIAI	0.006637	11
HLA-A*68:02	1	1	9	9	YTENTSSYY	YTENTSSYY	YTENTSSYY	0.006615	6.3
HLA-A*02:06	146	1	9	9	TTELRTYTI	TTELRTYTI	TTELRTYTI	0.006585	8.5
HLA-A*01:01	83	1	9	9	ILFQKAFSM	ILFQKAFSM	ILFQKAFSM	0.006583	4.8
HLA-B*51:01	3	1	9	9	ISDRATRKY	ISDRATRKY	ISDRATRKY	0.006524	7.5
HLA-A*32:01	77	1	9	9	LFKIDNNTF	LFKIDNNTF	LFKIDNNTF	0.006519	4.3
HLA-A*68:02	144	1	9	9	GIIIAIIAL	GIIIAIIAL	GIIIAIIAL	0.006506	6.3
HLA-B*57:01	179	1	9	9	NYTENTSSY	NYTENTSSY	NYTENTSSY	0.00646	7.9
HLA-A*30:02	40	1	9	9	SFFVWVIIL	SFFVWVIIL	SFFVWVIIL	0.00646	8.3
HLA-A*68:02	130	1	9	9	NINADIGEW	NINADIGEW	NINADIGEW	0.006441	6.4
HLA-A*23:01	113	1	9	9	TTQALQLFL	TTQALQLFL	TTQALQLFL	0.006437	3.7
HLA-A*01:01	130	1	9	9	NINADIGEW	NINADIGEW	NINADIGEW	0.00642	4.8
HLA-B*51:01	49	1	9	9	THTSGPSVM	THTSGPSVM	THTSGPSVM	0.006401	7.6
HLA-B*40:01	4	1	9	9	FHKDGAFFL	FHKDGAFFL	FHKDGAFFL	0.006399	3.4
HLA-A*33:01	32	1	9	9	HLASTDQLK	HLASTDQLK	HLASTDQLK	0.006384	6.1
HLA-B*35:01	86	1	9	9	DHLASTDQL	DHLASTDQL	DHLASTDQL	0.006357	4.5
HLA-A*03:01	11	1	9	9	HKDGAFFLY	HKDGAFFLY	HKDGAFFLY	0.006341	5.6
HLA-B*44:02	179	1	9	9	NYTENTSSY	NYTENTSSY	NYTENTSSY	0.006325	3.3
HLA-A*30:01	84	1	9	9	AFHKDGAFF	AFHKDGAFF	AFHKDGAFF	0.006316	11
HLA-A*01:01	123	1	9	9	VVTNSTLEV	VVTNSTLEV	VVTNSTLEV	0.006311	4.9
HLA-A*31:01	60	1	9	9	TVIYRGVNF	TVIYRGVNF	TVIYRGVNF	0.006297	7.7
HLA-A*24:02	105	1	9	9	SSYYATSYL	SSYYATSYL	SSYYATSYL	0.006284	3.7
HLA-B*44:03	150	1	9	9	FRKSSFFVW	FRKSSFFVW	FRKSSFFVW	0.00627	3.5
HLA-B*58:01	123	1	9	9	VVTNSTLEV	VVTNSTLEV	VVTNSTLEV	0.006253	5.4
HLA-A*01:01	32	1	9	9	HLASTDQLK	HLASTDQLK	HLASTDQLK	0.006249	4.9
HLA-B*35:01	120	1	9	9	LFLRATTEL	LFLRATTEL	LFLRATTEL	0.006244	4.6
HLA-B*15:01	98	1	9	9	KAFSMPLGV	KAFSMPLGV	KAFSMPLGV	0.006234	6.5
HLA-B*44:03	45	1	9	9	FQLNDTIHL	FQLNDTIHL	FQLNDTIHL	0.006219	3.6
HLA-A*33:01	41	1	9	9	RSRRQTNTK	RSRRQTNTK	RSRRQTNTK	0.006206	6.2
HLA-B*51:01	175	1	9	9	LPSQNSTEG	LPSQNSTEG	LPSQNSTEG	0.006199	7.7
HLA-A*23:01	28	1	9	9	ITDKINQII	ITDKINQII	ITDKINQII	0.006198	3.7
HLA-A*02:06	54	1	9	9	ETITETAAT	ETITETAAT	ETITETAAT	0.006193	8.8
HLA-A*26:01	55	1	9	9	FGAQHSTTL	FGAQHSTTL	FGAQHSTTL	0.006168	4.2
HLA-B*07:02	176	1	9	9	LLQLPRDKF	LLQLPRDKF	LLQLPRDKF	0.006164	4.9
HLA-B*35:01	67	1	9	9	EVTEIDQLV	EVTEIDQLV	EVTEIDQLV	0.006143	4.6
HLA-A*32:01	12	1	9	9	FFVWVIILF	FFVWVIILF	FFVWVIILF	0.006111	4.5
HLA-A*26:01	77	1	9	9	LFKIDNNTF	LFKIDNNTF	LFKIDNNTF	0.006109	4.3
HLA-A*02:06	171	1	9	9	TQALQLFLR	TQALQLFLR	TQALQLFLR	0.006069	8.9
HLA-B*35:01	112	1	9	9	ETFLQSPPI	ETFLQSPPI	ETFLQSPPI	0.006053	4.6
HLA-A*23:01	168	1	9	9	QLKSVGLNL	QLKSVGLNL	QLKSVGLNL	0.006049	3.8
HLA-A*11:01	113	1	9	9	TTQALQLFL	TTQALQLFL	TTQALQLFL	0.006049	5
HLA-B*51:01	141	1	9	9	GITGIIIAI	GITGIIIAI	GITGIIIAI	0.006033	7.9
HLA-B*08:01	118	1	9	9	KNSPGMVPL	KNSPGMVPL	KNSPGMVPL	0.006022	7.9
HLA-B*35:01	56	1	9	9	RPSSSQIPS	RPSSSQIPS	RPSSSQIPS	0.005976	4.6
HLA-B*53:01	131	1	9	9	ITSTVTGIL	ITSTVTGIL	ITSTVTGIL	0.005966	4.2
HLA-B*35:01	39	1	9	9	VPKNSPGMV	VPKNSPGMV	VPKNSPGMV	0.005962	4.6
HLA-B*58:01	13	1	9	9	GTGPCPGDY	GTGPCPGDY	GTGPCPGDY	0.005962	5.5
HLA-A*30:01	112	1	9	9	ETFLQSPPI	ETFLQSPPI	ETFLQSPPI	0.005953	12
HLA-B*15:01	150	1	9	9	FRKSSFFVW	FRKSSFFVW	FRKSSFFVW	0.005936	6.6
HLA-A*31:01	52	1	9	9	IIIAIIALL	IIIAIIALL	IIIAIIALL	0.005903	7.9
HLA-A*03:01	36	1	9	9	QLRGEELSF	QLRGEELSF	QLRGEELSF	0.005895	5.8
HLA-A*01:01	37	1	9	9	AQHSTTLFK	AQHSTTLFK	AQHSTTLFK	0.005891	5.1
HLA-B*57:01	112	1	9	9	ETFLQSPPI	ETFLQSPPI	ETFLQSPPI	0.005884	8.2
HLA-B*51:01	51	1	9	9	FLYDRLAST	FLYDRLAST	FLYDRLAST	0.005851	8
HLA-A*30:01	125	1	9	9	GAQHSTTLF	GAQHSTTLF	GAQHSTTLF	0.005839	12
HLA-B*40:01	66	1	9	9	ILAKPKETF	ILAKPKETF	ILAKPKETF	0.005829	3.5
HLA-A*01:01	90	1	9	9	GPCPGDYAF	GPCPGDYAF	GPCPGDYAF	0.005821	5.1
HLA-A*02:03	119	1	9	9	QWIPAGIGI	QWIPAGIGI	QWIPAGIGI	0.005818	7.3
HLA-B*08:01	15	1	9	9	KCNPNLHYW	KCNPNLHYW	KCNPNLHYW	0.005817	8.1
HLA-B*51:01	168	1	9	9	QLKSVGLNL	QLKSVGLNL	QLKSVGLNL	0.005805	8
HLA-A*26:01	123	1	9	9	VVTNSTLEV	VVTNSTLEV	VVTNSTLEV	0.0058	4.4
HLA-A*31:01	113	1	9	9	TTQALQLFL	TTQALQLFL	TTQALQLFL	0.005787	8
HLA-B*51:01	20	1	9	9	TELRTYTIL	TELRTYTIL	TELRTYTIL	0.005759	8.1
HLA-B*57:01	13	1	9	9	GTGPCPGDY	GTGPCPGDY	GTGPCPGDY	0.005741	8.3
HLA-A*11:01	13	1	9	9	GTGPCPGDY	GTGPCPGDY	GTGPCPGDY	0.005726	5.1
HLA-B*53:01	97	1	9	9	AAGIAWIPY	AAGIAWIPY	AAGIAWIPY	0.005723	4.3
HLA-A*30:01	71	1	9	9	IIALLCVCK	IIALLCVCK	IIALLCVCK	0.005723	12
HLA-A*23:01	87	1	9	9	NADIGEWAF	NADIGEWAF	NADIGEWAF	0.005719	3.9
HLA-B*57:01	143	1	9	9	TVTGILGSL	TVTGILGSL	TVTGILGSL	0.005716	8.3
HLA-A*30:02	120	1	9	9	LFLRATTEL	LFLRATTEL	LFLRATTEL	0.005704	8.9
HLA-B*15:01	63	1	9	9	LMHNQNALV	LMHNQNALV	LMHNQNALV	0.0057	6.7
HLA-B*53:01	143	1	9	9	TVTGILGSL	TVTGILGSL	TVTGILGSL	0.005692	4.3
HLA-A*02:06	20	1	9	9	TELRTYTIL	TELRTYTIL	TELRTYTIL	0.005668	9.1
HLA-A*02:03	108	1	9	9	LYDRLASTV	LYDRLASTV	LYDRLASTV	0.005632	7.5
HLA-B*57:01	93	1	9	9	STDIPSATK	STDIPSATK	STDIPSATK	0.005631	8.4
HLA-B*51:01	2	1	9	9	TSSYYATSY	TSSYYATSY	TSSYYATSY	0.00562	8.2
HLA-B*44:03	3	1	9	9	ISDRATRKY	ISDRATRKY	ISDRATRKY	0.005614	3.8
HLA-A*32:01	87	1	9	9	NADIGEWAF	NADIGEWAF	NADIGEWAF	0.005596	4.7
HLA-B*08:01	134	1	9	9	TTPENITTA	TTPENITTA	TTPENITTA	0.005563	8.3
HLA-A*01:01	73	1	9	9	QTNTKATGK	QTNTKATGK	QTNTKATGK	0.005558	5.3
HLA-A*02:01	40	1	9	9	SFFVWVIIL	SFFVWVIIL	SFFVWVIIL	0.005538	6.6
HLA-B*51:01	35	1	9	9	LEVTEIDQL	LEVTEIDQL	LEVTEIDQL	0.005532	8.2
HLA-A*30:01	1	1	9	9	YTENTSSYY	YTENTSSYY	YTENTSSYY	0.005518	12
HLA-A*68:01	132	1	9	9	RATTELRTY	RATTELRTY	RATTELRTY	0.005429	8.6
HLA-A*26:01	131	1	9	9	ITSTVTGIL	ITSTVTGIL	ITSTVTGIL	0.005402	4.6
HLA-A*32:01	129	1	9	9	KIDNNTFVR	KIDNNTFVR	KIDNNTFVR	0.005399	4.8
HLA-B*15:01	87	1	9	9	NADIGEWAF	NADIGEWAF	NADIGEWAF	0.005386	6.9
HLA-A*02:06	176	1	9	9	LLQLPRDKF	LLQLPRDKF	LLQLPRDKF	0.005385	9.3
HLA-A*68:01	38	1	9	9	YAFHKDGAF	YAFHKDGAF	YAFHKDGAF	0.00535	8.6
HLA-A*31:01	18	1	9	9	KSSFFVWVI	KSSFFVWVI	KSSFFVWVI	0.005348	8.2
HLA-B*07:02	98	1	9	9	KAFSMPLGV	KAFSMPLGV	KAFSMPLGV	0.005341	5.2
HLA-A*11:01	98	1	9	9	KAFSMPLGV	KAFSMPLGV	KAFSMPLGV	0.00533	5.3
HLA-A*33:01	11	1	9	9	HKDGAFFLY	HKDGAFFLY	HKDGAFFLY	0.005317	6.6
HLA-B*57:01	170	1	9	9	QLNDTIHLH	QLNDTIHLH	QLNDTIHLH	0.005316	8.6
HLA-A*30:01	77	1	9	9	LFKIDNNTF	LFKIDNNTF	LFKIDNNTF	0.005306	12
HLA-A*30:01	55	1	9	9	FGAQHSTTL	FGAQHSTTL	FGAQHSTTL	0.005295	12
HLA-A*26:01	174	1	9	9	GIYTEGLMH	GIYTEGLMH	GIYTEGLMH	0.00528	4.6
HLA-B*53:01	84	1	9	9	AFHKDGAFF	AFHKDGAFF	AFHKDGAFF	0.005277	4.4
HLA-B*40:01	86	1	9	9	DHLASTDQL	DHLASTDQL	DHLASTDQL	0.005249	3.7
HLA-B*44:02	44	1	9	9	KINQIIHDF	KINQIIHDF	KINQIIHDF	0.00522	3.6
HLA-B*57:01	24	1	9	9	RLASTVIYR	RLASTVIYR	RLASTVIYR	0.0052	8.7
HLA-A*33:01	23	1	9	9	RISDRATRK	RISDRATRK	RISDRATRK	0.005171	6.7
HLA-A*68:02	63	1	9	9	LMHNQNALV	LMHNQNALV	LMHNQNALV	0.005166	7.1
HLA-A*02:01	65	1	9	9	NFAEGVIAF	NFAEGVIAF	NFAEGVIAF	0.005163	6.8
HLA-A*24:02	87	1	9	9	NADIGEWAF	NADIGEWAF	NADIGEWAF	0.00516	4
HLA-A*26:01	137	1	9	9	YTEGLMHNQ	YTEGLMHNQ	YTEGLMHNQ	0.005159	4.7
HLA-A*24:02	75	1	9	9	ITTAVKTVL	ITTAVKTVL	ITTAVKTVL	0.00514	4
HLA-B*08:01	184	1	9	9	QHNAAGIAW	QHNAAGIAW	QHNAAGIAW	0.005132	8.6
HLA-A*23:01	11	1	9	9	HKDGAFFLY	HKDGAFFLY	HKDGAFFLY	0.005132	4
HLA-B*08:01	12	1	9	9	FFVWVIILF	FFVWVIILF	FFVWVIILF	0.005128	8.6
HLA-B*15:01	131	1	9	9	ITSTVTGIL	ITSTVTGIL	ITSTVTGIL	0.005122	7.1
HLA-B*44:03	66	1	9	9	ILAKPKETF	ILAKPKETF	ILAKPKETF	0.005122	4
HLA-A*23:01	105	1	9	9	SSYYATSYL	SSYYATSYL	SSYYATSYL	0.005117	4
HLA-B*58:01	170	1	9	9	QLNDTIHLH	QLNDTIHLH	QLNDTIHLH	0.005113	5.9
HLA-B*15:01	20	1	9	9	TELRTYTIL	TELRTYTIL	TELRTYTIL	0.005113	7.1
HLA-A*02:06	93	1	9	9	STDIPSATK	STDIPSATK	STDIPSATK	0.0051	9.6
HLA-A*02:06	125	1	9	9	GAQHSTTLF	GAQHSTTLF	GAQHSTTLF	0.005091	9.6
HLA-A*02:03	118	1	9	9	KNSPGMVPL	KNSPGMVPL	KNSPGMVPL	0.005066	7.9
HLA-A*68:01	174	1	9	9	GIYTEGLMH	GIYTEGLMH	GIYTEGLMH	0.005063	8.8
HLA-B*35:01	79	1	9	9	EGIYTEGLM	EGIYTEGLM	EGIYTEGLM	0.005039	5
HLA-A*30:01	28	1	9	9	ITDKINQII	ITDKINQII	ITDKINQII	0.005038	13
HLA-B*15:01	41	1	9	9	RSRRQTNTK	RSRRQTNTK	RSRRQTNTK	0.005001	7.1
HLA-A*30:02	141	1	9	9	GITGIIIAI	GITGIIIAI	GITGIIIAI	0.00499	9.7
HLA-B*53:01	53	1	9	9	LVPKNSPGM	LVPKNSPGM	LVPKNSPGM	0.004983	4.6
HLA-B*40:01	49	1	9	9	THTSGPSVM	THTSGPSVM	THTSGPSVM	0.004962	3.8
HLA-A*68:02	26	1	9	9	FQKAFSMPL	FQKAFSMPL	FQKAFSMPL	0.004947	7.2
HLA-A*02:03	4	1	9	9	FHKDGAFFL	FHKDGAFFL	FHKDGAFFL	0.004946	7.9
HLA-B*44:02	46	1	9	9	DTIHLHQQL	DTIHLHQQL	DTIHLHQQL	0.004944	3.7
HLA-A*02:06	69	1	9	9	EWAENCYNL	EWAENCYNL	EWAENCYNL	0.004934	9.7
HLA-A*32:01	160	1	9	9	NQNALVCGL	NQNALVCGL	NQNALVCGL	0.004924	5
HLA-A*32:01	158	1	9	9	LITSTVTGI	LITSTVTGI	LITSTVTGI	0.004912	5
HLA-B*44:02	150	1	9	9	FRKSSFFVW	FRKSSFFVW	FRKSSFFVW	0.004911	3.7
HLA-A*30:02	30	1	9	9	VIAFLILAK	VIAFLILAK	VIAFLILAK	0.004905	9.8
HLA-A*30:01	4	1	9	9	FHKDGAFFL	FHKDGAFFL	FHKDGAFFL	0.004894	13
HLA-A*33:01	147	1	9	9	EIENFGAQH	EIENFGAQH	EIENFGAQH	0.004891	6.8
HLA-A*30:02	147	1	9	9	EIENFGAQH	EIENFGAQH	EIENFGAQH	0.004867	9.8
HLA-A*11:01	60	1	9	9	TVIYRGVNF	TVIYRGVNF	TVIYRGVNF	0.004857	5.5
HLA-B*58:01	117	1	9	9	YLEYEIENF	YLEYEIENF	YLEYEIENF	0.004851	6.1
HLA-A*11:01	11	1	9	9	HKDGAFFLY	HKDGAFFLY	HKDGAFFLY	0.004831	5.5
HLA-A*30:01	102	1	9	9	GLSLLQLPR	GLSLLQLPR	GLSLLQLPR	0.004829	13
HLA-A*03:01	47	1	9	9	RPHTPQFLF	RPHTPQFLF	RPHTPQFLF	0.004827	6.3
HLA-B*58:01	45	1	9	9	FQLNDTIHL	FQLNDTIHL	FQLNDTIHL	0.004816	6.1
HLA-A*02:06	58	1	9	9	VIILFQKAF	VIILFQKAF	VIILFQKAF	0.004808	9.9
HLA-B*57:01	45	1	9	9	FQLNDTIHL	FQLNDTIHL	FQLNDTIHL	0.004803	9
HLA-A*33:01	52	1	9	9	IIIAIIALL	IIIAIIALL	IIIAIIALL	0.004789	6.9
HLA-A*11:01	15	1	9	9	KCNPNLHYW	KCNPNLHYW	KCNPNLHYW	0.004789	5.5
HLA-A*02:06	17	1	9	9	RTYTILNRK	RTYTILNRK	RTYTILNRK	0.004788	9.9
HLA-B*15:01	118	1	9	9	KNSPGMVPL	KNSPGMVPL	KNSPGMVPL	0.004782	7.3
HLA-A*01:01	27	1	9	9	VVSYEAGEW	VVSYEAGEW	VVSYEAGEW	0.004781	5.7
HLA-B*51:01	11	1	9	9	HKDGAFFLY	HKDGAFFLY	HKDGAFFLY	0.00476	8.9
HLA-A*32:01	97	1	9	9	AAGIAWIPY	AAGIAWIPY	AAGIAWIPY	0.004758	5.1
HLA-A*01:01	24	1	9	9	RLASTVIYR	RLASTVIYR	RLASTVIYR	0.004755	5.7
HLA-B*40:01	8	1	9	9	IHDFIDNPL	IHDFIDNPL	IHDFIDNPL	0.004733	3.8
HLA-A*30:02	63	1	9	9	LMHNQNALV	LMHNQNALV	LMHNQNALV	0.004717	10
HLA-B*44:02	36	1	9	9	QLRGEELSF	QLRGEELSF	QLRGEELSF	0.004715	3.8
HLA-A*24:02	90	1	9	9	GPCPGDYAF	GPCPGDYAF	GPCPGDYAF	0.004711	4.2
HLA-A*02:01	108	1	9	9	LYDRLASTV	LYDRLASTV	LYDRLASTV	0.004708	7.1
HLA-A*02:03	61	1	9	9	ILNRKAIDF	ILNRKAIDF	ILNRKAIDF	0.004706	8.1
HLA-B*51:01	69	1	9	9	EWAENCYNL	EWAENCYNL	EWAENCYNL	0.004705	8.9
HLA-A*30:01	51	1	9	9	FLYDRLAST	FLYDRLAST	FLYDRLAST	0.004694	13
HLA-B*35:01	163	1	9	9	YTILNRKAI	YTILNRKAI	YTILNRKAI	0.004677	5.2
HLA-A*11:01	126	1	9	9	HTPQFLFQL	HTPQFLFQL	HTPQFLFQL	0.004672	5.5
HLA-A*68:02	2	1	9	9	TSSYYATSY	TSSYYATSY	TSSYYATSY	0.004671	7.4
HLA-B*57:01	108	1	9	9	LYDRLASTV	LYDRLASTV	LYDRLASTV	0.004666	9.2
HLA-A*01:01	67	1	9	9	EVTEIDQLV	EVTEIDQLV	EVTEIDQLV	0.004666	5.8
HLA-A*26:01	29	1	9	9	NETTQALQL	NETTQALQL	NETTQALQL	0.004648	5
HLA-B*40:01	65	1	9	9	NFAEGVIAF	NFAEGVIAF	NFAEGVIAF	0.004647	3.9
HLA-A*02:03	18	1	9	9	KSSFFVWVI	KSSFFVWVI	KSSFFVWVI	0.004645	8.1
HLA-B*40:01	38	1	9	9	YAFHKDGAF	YAFHKDGAF	YAFHKDGAF	0.004635	3.9
HLA-A*32:01	179	1	9	9	NYTENTSSY	NYTENTSSY	NYTENTSSY	0.004633	5.2
HLA-A*33:01	4	1	9	9	FHKDGAFFL	FHKDGAFFL	FHKDGAFFL	0.00463	7
HLA-A*23:01	53	1	9	9	LVPKNSPGM	LVPKNSPGM	LVPKNSPGM	0.004628	4.3
HLA-A*33:01	37	1	9	9	AQHSTTLFK	AQHSTTLFK	AQHSTTLFK	0.004614	7
HLA-B*08:01	113	1	9	9	TTQALQLFL	TTQALQLFL	TTQALQLFL	0.004605	9.1
HLA-A*30:02	85	1	9	9	GILGSLGLR	GILGSLGLR	GILGSLGLR	0.004604	11
HLA-B*57:01	123	1	9	9	VVTNSTLEV	VVTNSTLEV	VVTNSTLEV	0.004598	9.2
HLA-B*58:01	179	1	9	9	NYTENTSSY	NYTENTSSY	NYTENTSSY	0.004594	6.2
HLA-B*08:01	119	1	9	9	QWIPAGIGI	QWIPAGIGI	QWIPAGIGI	0.004575	9.2
HLA-B*51:01	77	1	9	9	LFKIDNNTF	LFKIDNNTF	LFKIDNNTF	0.004569	9.1
HLA-A*11:01	44	1	9	9	KINQIIHDF	KINQIIHDF	KINQIIHDF	0.004564	5.6
HLA-B*57:01	117	1	9	9	YLEYEIENF	YLEYEIENF	YLEYEIENF	0.00455	9.3
HLA-A*26:01	90	1	9	9	GPCPGDYAF	GPCPGDYAF	GPCPGDYAF	0.004542	5
HLA-B*53:01	79	1	9	9	EGIYTEGLM	EGIYTEGLM	EGIYTEGLM	0.004518	4.8
HLA-B*51:01	34	1	9	9	SEQLRGEEL	SEQLRGEEL	SEQLRGEEL	0.004512	9.1
HLA-A*33:01	112	1	9	9	ETFLQSPPI	ETFLQSPPI	ETFLQSPPI	0.004488	7
HLA-A*01:01	61	1	9	9	ILNRKAIDF	ILNRKAIDF	ILNRKAIDF	0.004484	5.9
HLA-A*68:01	48	1	9	9	LANETTQAL	LANETTQAL	LANETTQAL	0.004484	9.1
HLA-B*51:01	8	1	9	9	IHDFIDNPL	IHDFIDNPL	IHDFIDNPL	0.00448	9.2
HLA-A*01:01	131	1	9	9	ITSTVTGIL	ITSTVTGIL	ITSTVTGIL	0.004476	5.9
HLA-B*44:03	130	1	9	9	NINADIGEW	NINADIGEW	NINADIGEW	0.004471	4.2
HLA-A*30:02	160	1	9	9	NQNALVCGL	NQNALVCGL	NQNALVCGL	0.004464	11
HLA-A*26:01	180	1	9	9	FLRATTELR	FLRATTELR	FLRATTELR	0.004459	5.1
HLA-A*02:03	65	1	9	9	NFAEGVIAF	NFAEGVIAF	NFAEGVIAF	0.004451	8.3
HLA-B*44:02	37	1	9	9	AQHSTTLFK	AQHSTTLFK	AQHSTTLFK	0.004446	3.9
HLA-A*30:02	46	1	9	9	DTIHLHQQL	DTIHLHQQL	DTIHLHQQL	0.004386	11
HLA-B*57:01	53	1	9	9	LVPKNSPGM	LVPKNSPGM	LVPKNSPGM	0.004385	9.4
HLA-B*07:02	8	1	9	9	IHDFIDNPL	IHDFIDNPL	IHDFIDNPL	0.004385	5.8
HLA-B*53:01	104	1	9	9	IPYFGPGAE	IPYFGPGAE	IPYFGPGAE	0.004364	4.9
HLA-A*02:01	61	1	9	9	ILNRKAIDF	ILNRKAIDF	ILNRKAIDF	0.004346	7.4
HLA-A*02:06	3	1	9	9	ISDRATRKY	ISDRATRKY	ISDRATRKY	0.004336	11
HLA-A*02:03	140	1	9	9	KFRKSSFFV	KFRKSSFFV	KFRKSSFFV	0.004331	8.4
HLA-B*07:02	126	1	9	9	HTPQFLFQL	HTPQFLFQL	HTPQFLFQL	0.004317	5.8
HLA-B*07:02	123	1	9	9	VVTNSTLEV	VVTNSTLEV	VVTNSTLEV	0.004317	5.8
HLA-A*33:01	105	1	9	9	SSYYATSYL	SSYYATSYL	SSYYATSYL	0.004302	7.2
HLA-A*02:01	120	1	9	9	LFLRATTEL	LFLRATTEL	LFLRATTEL	0.004284	7.4
HLA-A*01:01	29	1	9	9	NETTQALQL	NETTQALQL	NETTQALQL	0.004282	6.1
HLA-B*07:02	58	1	9	9	VIILFQKAF	VIILFQKAF	VIILFQKAF	0.004265	5.9
HLA-A*30:01	46	1	9	9	DTIHLHQQL	DTIHLHQQL	DTIHLHQQL	0.004246	14
HLA-B*15:01	163	1	9	9	YTILNRKAI	YTILNRKAI	YTILNRKAI	0.004244	7.6
HLA-B*51:01	179	1	9	9	NYTENTSSY	NYTENTSSY	NYTENTSSY	0.004233	9.5
HLA-B*07:02	4	1	9	9	FHKDGAFFL	FHKDGAFFL	FHKDGAFFL	0.00422	5.9
HLA-A*02:03	40	1	9	9	SFFVWVIIL	SFFVWVIIL	SFFVWVIIL	0.004185	8.5
HLA-A*23:01	90	1	9	9	GPCPGDYAF	GPCPGDYAF	GPCPGDYAF	0.004161	4.5
HLA-A*02:01	118	1	9	9	KNSPGMVPL	KNSPGMVPL	KNSPGMVPL	0.004156	7.5
HLA-A*33:01	113	1	9	9	TTQALQLFL	TTQALQLFL	TTQALQLFL	0.004153	7.3
HLA-B*40:01	55	1	9	9	FGAQHSTTL	FGAQHSTTL	FGAQHSTTL	0.00414	4.1
HLA-A*02:06	47	1	9	9	RPHTPQFLF	RPHTPQFLF	RPHTPQFLF	0.004139	11
HLA-B*35:01	35	1	9	9	LEVTEIDQL	LEVTEIDQL	LEVTEIDQL	0.004135	5.5
HLA-A*33:01	70	1	9	9	ETAATIIGT	ETAATIIGT	ETAATIIGT	0.004128	7.3
HLA-B*44:02	84	1	9	9	AFHKDGAFF	AFHKDGAFF	AFHKDGAFF	0.004123	4.1
HLA-A*02:01	4	1	9	9	FHKDGAFFL	FHKDGAFFL	FHKDGAFFL	0.004121	7.5
HLA-B*57:01	140	1	9	9	KFRKSSFFV	KFRKSSFFV	KFRKSSFFV	0.004117	9.8
HLA-A*01:01	22	1	9	9	TPENITTAV	TPENITTAV	TPENITTAV	0.004113	6.2
HLA-A*30:02	162	1	9	9	RATRKYSDL	RATRKYSDL	RATRKYSDL	0.004096	11
HLA-A*01:01	174	1	9	9	GIYTEGLMH	GIYTEGLMH	GIYTEGLMH	0.004088	6.2
HLA-A*32:01	63	1	9	9	LMHNQNALV	LMHNQNALV	LMHNQNALV	0.004084	5.5
HLA-A*02:03	180	1	9	9	FLRATTELR	FLRATTELR	FLRATTELR	0.004067	8.6
HLA-A*31:01	47	1	9	9	RPHTPQFLF	RPHTPQFLF	RPHTPQFLF	0.004066	9.2
HLA-B*57:01	120	1	9	9	LFLRATTEL	LFLRATTEL	LFLRATTEL	0.004045	9.8
HLA-A*24:02	52	1	9	9	IIIAIIALL	IIIAIIALL	IIIAIIALL	0.004035	4.5
HLA-B*15:01	93	1	9	9	STDIPSATK	STDIPSATK	STDIPSATK	0.004022	7.8
HLA-A*68:01	47	1	9	9	RPHTPQFLF	RPHTPQFLF	RPHTPQFLF	0.004016	9.5
HLA-A*01:01	55	1	9	9	FGAQHSTTL	FGAQHSTTL	FGAQHSTTL	0.004015	6.3
HLA-A*26:01	141	1	9	9	GITGIIIAI	GITGIIIAI	GITGIIIAI	0.004014	5.4
HLA-B*58:01	168	1	9	9	QLKSVGLNL	QLKSVGLNL	QLKSVGLNL	0.003995	6.7
HLA-B*35:01	69	1	9	9	EWAENCYNL	EWAENCYNL	EWAENCYNL	0.003988	5.6
HLA-B*08:01	98	1	9	9	KAFSMPLGV	KAFSMPLGV	KAFSMPLGV	0.003986	9.9
HLA-B*44:03	46	1	9	9	DTIHLHQQL	DTIHLHQQL	DTIHLHQQL	0.003983	4.4
HLA-A*23:01	75	1	9	9	ITTAVKTVL	ITTAVKTVL	ITTAVKTVL	0.003981	4.6
HLA-B*40:01	118	1	9	9	KNSPGMVPL	KNSPGMVPL	KNSPGMVPL	0.003927	4.1
HLA-A*30:01	63	1	9	9	LMHNQNALV	LMHNQNALV	LMHNQNALV	0.00392	14
HLA-B*44:03	44	1	9	9	KINQIIHDF	KINQIIHDF	KINQIIHDF	0.00392	4.4
HLA-B*08:01	123	1	9	9	VVTNSTLEV	VVTNSTLEV	VVTNSTLEV	0.003919	10
HLA-A*68:02	47	1	9	9	RPHTPQFLF	RPHTPQFLF	RPHTPQFLF	0.003911	8.1
HLA-B*40:01	83	1	9	9	ILFQKAFSM	ILFQKAFSM	ILFQKAFSM	0.003903	4.1
HLA-A*68:02	66	1	9	9	ILAKPKETF	ILAKPKETF	ILAKPKETF	0.003897	8.1
HLA-A*03:01	13	1	9	9	GTGPCPGDY	GTGPCPGDY	GTGPCPGDY	0.003887	6.8
HLA-A*30:01	109	1	9	9	GLMHNQNAL	GLMHNQNAL	GLMHNQNAL	0.003864	14
HLA-A*02:06	40	1	9	9	SFFVWVIIL	SFFVWVIIL	SFFVWVIIL	0.003856	11
HLA-B*07:02	29	1	9	9	NETTQALQL	NETTQALQL	NETTQALQL	0.003855	6.1
HLA-B*44:03	1	1	9	9	YTENTSSYY	YTENTSSYY	YTENTSSYY	0.003851	4.4
HLA-A*01:01	142	1	9	9	HIPEGETTL	HIPEGETTL	HIPEGETTL	0.00383	6.5
HLA-A*24:02	86	1	9	9	DHLASTDQL	DHLASTDQL	DHLASTDQL	0.003825	4.6
HLA-A*30:02	180	1	9	9	FLRATTELR	FLRATTELR	FLRATTELR	0.003818	12
HLA-B*07:02	41	1	9	9	RSRRQTNTK	RSRRQTNTK	RSRRQTNTK	0.003816	6.2
HLA-B*35:01	26	1	9	9	FQKAFSMPL	FQKAFSMPL	FQKAFSMPL	0.003814	5.7
HLA-B*51:01	184	1	9	9	QHNAAGIAW	QHNAAGIAW	QHNAAGIAW	0.003809	10
HLA-B*08:01	64	1	9	9	AGIAWIPYF	AGIAWIPYF	AGIAWIPYF	0.003805	11
HLA-A*30:01	31	1	9	9	IPSSSPTTA	IPSSSPTTA	IPSSSPTTA	0.003788	15
HLA-B*15:01	119	1	9	9	QWIPAGIGI	QWIPAGIGI	QWIPAGIGI	0.003767	8.1
HLA-B*44:02	27	1	9	9	VVSYEAGEW	VVSYEAGEW	VVSYEAGEW	0.003767	4.3
HLA-A*33:01	150	1	9	9	FRKSSFFVW	FRKSSFFVW	FRKSSFFVW	0.003758	7.6
HLA-A*68:01	3	1	9	9	ISDRATRKY	ISDRATRKY	ISDRATRKY	0.00375	9.7
HLA-A*32:01	162	1	9	9	RATRKYSDL	RATRKYSDL	RATRKYSDL	0.003741	5.7
HLA-A*68:02	160	1	9	9	NQNALVCGL	NQNALVCGL	NQNALVCGL	0.003727	8.3
HLA-A*01:01	112	1	9	9	ETFLQSPPI	ETFLQSPPI	ETFLQSPPI	0.003712	6.6
HLA-B*15:01	120	1	9	9	LFLRATTEL	LFLRATTEL	LFLRATTEL	0.003711	8.1
HLA-A*30:02	52	1	9	9	IIIAIIALL	IIIAIIALL	IIIAIIALL	0.003703	12
HLA-B*15:01	17	1	9	9	RTYTILNRK	RTYTILNRK	RTYTILNRK	0.003701	8.1
HLA-B*44:03	90	1	9	9	GPCPGDYAF	GPCPGDYAF	GPCPGDYAF	0.003696	4.5
HLA-B*40:01	36	1	9	9	QLRGEELSF	QLRGEELSF	QLRGEELSF	0.003696	4.2
HLA-A*68:01	166	1	9	9	TTGRLIWTL	TTGRLIWTL	TTGRLIWTL	0.003692	9.8
HLA-B*15:01	24	1	9	9	RLASTVIYR	RLASTVIYR	RLASTVIYR	0.003691	8.1
HLA-A*24:02	11	1	9	9	HKDGAFFLY	HKDGAFFLY	HKDGAFFLY	0.003688	4.7
HLA-B*58:01	112	1	9	9	ETFLQSPPI	ETFLQSPPI	ETFLQSPPI	0.00366	7
HLA-B*15:01	35	1	9	9	LEVTEIDQL	LEVTEIDQL	LEVTEIDQL	0.003654	8.2
HLA-B*08:01	35	1	9	9	LEVTEIDQL	LEVTEIDQL	LEVTEIDQL	0.00364	11
HLA-B*51:01	25	1	9	9	AEGVIAFLI	AEGVIAFLI	AEGVIAFLI	0.003626	11
HLA-A*33:01	134	1	9	9	TTPENITTA	TTPENITTA	TTPENITTA	0.003619	7.7
HLA-A*68:02	17	1	9	9	RTYTILNRK	RTYTILNRK	RTYTILNRK	0.003608	8.4
HLA-A*68:01	75	1	9	9	ITTAVKTVL	ITTAVKTVL	ITTAVKTVL	0.003601	9.9
HLA-A*68:02	108	1	9	9	LYDRLASTV	LYDRLASTV	LYDRLASTV	0.003598	8.4
HLA-B*58:01	41	1	9	9	RSRRQTNTK	RSRRQTNTK	RSRRQTNTK	0.003594	7.1
HLA-A*68:02	137	1	9	9	YTEGLMHNQ	YTEGLMHNQ	YTEGLMHNQ	0.003588	8.4
HLA-A*30:02	29	1	9	9	NETTQALQL	NETTQALQL	NETTQALQL	0.003588	12
HLA-A*24:02	55	1	9	9	FGAQHSTTL	FGAQHSTTL	FGAQHSTTL	0.003583	4.7
HLA-A*02:03	112	1	9	9	ETFLQSPPI	ETFLQSPPI	ETFLQSPPI	0.003576	9.1
HLA-A*68:01	130	1	9	9	NINADIGEW	NINADIGEW	NINADIGEW	0.003572	9.9
HLA-B*44:03	84	1	9	9	AFHKDGAFF	AFHKDGAFF	AFHKDGAFF	0.003559	4.6
HLA-A*30:01	45	1	9	9	FQLNDTIHL	FQLNDTIHL	FQLNDTIHL	0.00355	15
HLA-A*30:02	90	1	9	9	GPCPGDYAF	GPCPGDYAF	GPCPGDYAF	0.003536	12
HLA-A*02:06	29	1	9	9	NETTQALQL	NETTQALQL	NETTQALQL	0.003517	12
HLA-B*53:01	146	1	9	9	TTELRTYTI	TTELRTYTI	TTELRTYTI	0.003509	5.4
HLA-B*07:02	84	1	9	9	AFHKDGAFF	AFHKDGAFF	AFHKDGAFF	0.003504	6.4
HLA-A*68:01	59	1	9	9	FAEGVIAFL	FAEGVIAFL	FAEGVIAFL	0.003492	10
HLA-B*15:01	141	1	9	9	GITGIIIAI	GITGIIIAI	GITGIIIAI	0.00348	8.3
HLA-B*53:01	49	1	9	9	THTSGPSVM	THTSGPSVM	THTSGPSVM	0.003471	5.4
HLA-A*02:01	46	1	9	9	DTIHLHQQL	DTIHLHQQL	DTIHLHQQL	0.00347	8.1
HLA-A*26:01	24	1	9	9	RLASTVIYR	RLASTVIYR	RLASTVIYR	0.003466	5.9
HLA-A*33:01	54	1	9	9	ETITETAAT	ETITETAAT	ETITETAAT	0.003449	7.8
HLA-A*01:01	77	1	9	9	LFKIDNNTF	LFKIDNNTF	LFKIDNNTF	0.003441	7
HLA-A*26:01	97	1	9	9	AAGIAWIPY	AAGIAWIPY	AAGIAWIPY	0.003438	5.9
HLA-A*02:01	176	1	9	9	LLQLPRDKF	LLQLPRDKF	LLQLPRDKF	0.003427	8.2
HLA-B*44:03	36	1	9	9	QLRGEELSF	QLRGEELSF	QLRGEELSF	0.003427	4.7
HLA-A*02:06	132	1	9	9	RATTELRTY	RATTELRTY	RATTELRTY	0.003408	12
HLA-B*44:02	125	1	9	9	GAQHSTTLF	GAQHSTTLF	GAQHSTTLF	0.003397	4.5
HLA-A*31:01	119	1	9	9	QWIPAGIGI	QWIPAGIGI	QWIPAGIGI	0.003388	9.8
HLA-A*68:01	83	1	9	9	ILFQKAFSM	ILFQKAFSM	ILFQKAFSM	0.003384	11
HLA-A*31:01	51	1	9	9	FLYDRLAST	FLYDRLAST	FLYDRLAST	0.003368	9.9
HLA-B*44:02	1	1	9	9	YTENTSSYY	YTENTSSYY	YTENTSSYY	0.003367	4.5
HLA-A*31:01	179	1	9	9	NYTENTSSY	NYTENTSSY	NYTENTSSY	0.003365	9.9
HLA-B*35:01	54	1	9	9	ETITETAAT	ETITETAAT	ETITETAAT	0.003365	6
HLA-A*24:02	146	1	9	9	TTELRTYTI	TTELRTYTI	TTELRTYTI	0.003353	4.9
HLA-B*57:01	72	1	9	9	SPGMVPLHI	SPGMVPLHI	SPGMVPLHI	0.003312	11
HLA-B*15:01	123	1	9	9	VVTNSTLEV	VVTNSTLEV	VVTNSTLEV	0.003308	8.5
HLA-A*03:01	66	1	9	9	ILAKPKETF	ILAKPKETF	ILAKPKETF	0.003302	7.3
HLA-A*68:02	114	1	9	9	SQIPSSSPT	SQIPSSSPT	SQIPSSSPT	0.00329	8.8
HLA-B*08:01	170	1	9	9	QLNDTIHLH	QLNDTIHLH	QLNDTIHLH	0.003284	11
HLA-A*01:01	19	1	9	9	ILGSLGLRK	ILGSLGLRK	ILGSLGLRK	0.00328	7.2
HLA-A*26:01	75	1	9	9	ITTAVKTVL	ITTAVKTVL	ITTAVKTVL	0.003277	6.1
HLA-A*33:01	1	1	9	9	YTENTSSYY	YTENTSSYY	YTENTSSYY	0.003275	8
HLA-A*26:01	144	1	9	9	GIIIAIIAL	GIIIAIIAL	GIIIAIIAL	0.003271	6.1
HLA-B*40:01	184	1	9	9	QHNAAGIAW	QHNAAGIAW	QHNAAGIAW	0.003255	4.5
HLA-A*24:02	8	1	9	9	IHDFIDNPL	IHDFIDNPL	IHDFIDNPL	0.003255	4.9
HLA-A*33:01	58	1	9	9	VIILFQKAF	VIILFQKAF	VIILFQKAF	0.003251	8
HLA-B*07:02	166	1	9	9	TTGRLIWTL	TTGRLIWTL	TTGRLIWTL	0.003248	6.7
HLA-A*23:01	81	1	9	9	VWVIILFQK	VWVIILFQK	VWVIILFQK	0.003248	5
HLA-A*01:01	60	1	9	9	TVIYRGVNF	TVIYRGVNF	TVIYRGVNF	0.003237	7.2
HLA-A*33:01	137	1	9	9	YTEGLMHNQ	YTEGLMHNQ	YTEGLMHNQ	0.003235	8
HLA-A*02:06	5	1	9	9	YYATSYLEY	YYATSYLEY	YYATSYLEY	0.003235	12
HLA-B*07:02	140	1	9	9	KFRKSSFFV	KFRKSSFFV	KFRKSSFFV	0.003233	6.7
HLA-B*53:01	35	1	9	9	LEVTEIDQL	LEVTEIDQL	LEVTEIDQL	0.003229	5.6
HLA-A*23:01	49	1	9	9	THTSGPSVM	THTSGPSVM	THTSGPSVM	0.00322	5
HLA-B*07:02	146	1	9	9	TTELRTYTI	TTELRTYTI	TTELRTYTI	0.003218	6.7
HLA-B*51:01	40	1	9	9	SFFVWVIIL	SFFVWVIIL	SFFVWVIIL	0.003207	11
HLA-A*26:01	26	1	9	9	FQKAFSMPL	FQKAFSMPL	FQKAFSMPL	0.003201	6.1
HLA-B*07:02	113	1	9	9	TTQALQLFL	TTQALQLFL	TTQALQLFL	0.003187	6.7
HLA-A*26:01	184	1	9	9	QHNAAGIAW	QHNAAGIAW	QHNAAGIAW	0.003185	6.2
HLA-A*30:02	182	1	9	9	QLPRDKFRK	QLPRDKFRK	QLPRDKFRK	0.003169	13
HLA-B*07:02	28	1	9	9	ITDKINQII	ITDKINQII	ITDKINQII	0.003165	6.8
HLA-A*02:06	110	1	9	9	ITETAATII	ITETAATII	ITETAATII	0.003152	12
HLA-A*02:06	25	1	9	9	AEGVIAFLI	AEGVIAFLI	AEGVIAFLI	0.003142	13
HLA-B*51:01	12	1	9	9	FFVWVIILF	FFVWVIILF	FFVWVIILF	0.003142	11
HLA-B*44:03	49	1	9	9	THTSGPSVM	THTSGPSVM	THTSGPSVM	0.003127	4.9
HLA-A*31:01	11	1	9	9	HKDGAFFLY	HKDGAFFLY	HKDGAFFLY	0.003118	11
HLA-B*15:01	46	1	9	9	DTIHLHQQL	DTIHLHQQL	DTIHLHQQL	0.003108	8.7
HLA-A*02:01	112	1	9	9	ETFLQSPPI	ETFLQSPPI	ETFLQSPPI	0.003101	8.5
HLA-B*35:01	61	1	9	9	ILNRKAIDF	ILNRKAIDF	ILNRKAIDF	0.003093	6.3
HLA-B*40:01	145	1	9	9	FKIDNNTFV	FKIDNNTFV	FKIDNNTFV	0.00309	4.6
HLA-A*23:01	86	1	9	9	DHLASTDQL	DHLASTDQL	DHLASTDQL	0.00309	5.1
HLA-B*35:01	147	1	9	9	EIENFGAQH	EIENFGAQH	EIENFGAQH	0.003085	6.3
HLA-B*40:01	126	1	9	9	HTPQFLFQL	HTPQFLFQL	HTPQFLFQL	0.003078	4.6
HLA-A*30:01	39	1	9	9	VPKNSPGMV	VPKNSPGMV	VPKNSPGMV	0.00304	16
HLA-A*01:01	45	1	9	9	FQLNDTIHL	FQLNDTIHL	FQLNDTIHL	0.003035	7.5
HLA-A*31:01	65	1	9	9	NFAEGVIAF	NFAEGVIAF	NFAEGVIAF	0.003032	11
HLA-B*53:01	108	1	9	9	LYDRLASTV	LYDRLASTV	LYDRLASTV	0.003022	5.7
HLA-A*01:01	171	1	9	9	TQALQLFLR	TQALQLFLR	TQALQLFLR	0.002994	7.6
HLA-B*40:01	109	1	9	9	GLMHNQNAL	GLMHNQNAL	GLMHNQNAL	0.002993	4.6
HLA-B*40:01	168	1	9	9	QLKSVGLNL	QLKSVGLNL	QLKSVGLNL	0.002992	4.6
HLA-A*33:01	67	1	9	9	EVTEIDQLV	EVTEIDQLV	EVTEIDQLV	0.002979	8.4
HLA-A*23:01	8	1	9	9	IHDFIDNPL	IHDFIDNPL	IHDFIDNPL	0.002976	5.2
HLA-B*44:03	37	1	9	9	AQHSTTLFK	AQHSTTLFK	AQHSTTLFK	0.002972	5
HLA-B*44:02	45	1	9	9	FQLNDTIHL	FQLNDTIHL	FQLNDTIHL	0.002963	4.8
HLA-A*01:01	34	1	9	9	SEQLRGEEL	SEQLRGEEL	SEQLRGEEL	0.002962	7.6
HLA-B*15:01	7	1	9	9	GEELSFEAL	GEELSFEAL	GEELSFEAL	0.002961	8.9
HLA-A*11:01	99	1	9	9	TIIGTNGNH	TIIGTNGNH	TIIGTNGNH	0.002952	6.6
HLA-B*51:01	14	1	9	9	AENCYNLEI	AENCYNLEI	AENCYNLEI	0.002939	12
HLA-A*01:01	98	1	9	9	KAFSMPLGV	KAFSMPLGV	KAFSMPLGV	0.002931	7.6
HLA-A*68:02	110	1	9	9	ITETAATII	ITETAATII	ITETAATII	0.002922	9.4
HLA-A*68:01	173	1	9	9	SYYATSYLE	SYYATSYLE	SYYATSYLE	0.002917	11
HLA-A*26:01	45	1	9	9	FQLNDTIHL	FQLNDTIHL	FQLNDTIHL	0.002917	6.4
HLA-A*30:01	56	1	9	9	RPSSSQIPS	RPSSSQIPS	RPSSSQIPS	0.002894	17
HLA-B*15:01	180	1	9	9	FLRATTELR	FLRATTELR	FLRATTELR	0.002889	9
HLA-B*07:02	184	1	9	9	QHNAAGIAW	QHNAAGIAW	QHNAAGIAW	0.002885	7.1
HLA-B*53:01	52	1	9	9	IIIAIIALL	IIIAIIALL	IIIAIIALL	0.002882	5.8
HLA-A*33:01	77	1	9	9	LFKIDNNTF	LFKIDNNTF	LFKIDNNTF	0.002867	8.5
HLA-A*02:06	129	1	9	9	KIDNNTFVR	KIDNNTFVR	KIDNNTFVR	0.002863	13
HLA-B*44:03	125	1	9	9	GAQHSTTLF	GAQHSTTLF	GAQHSTTLF	0.00286	5.1
HLA-A*32:01	69	1	9	9	EWAENCYNL	EWAENCYNL	EWAENCYNL	0.002857	6.5
HLA-A*32:01	108	1	9	9	LYDRLASTV	LYDRLASTV	LYDRLASTV	0.002855	6.5
HLA-B*07:02	35	1	9	9	LEVTEIDQL	LEVTEIDQL	LEVTEIDQL	0.002853	7.1
HLA-B*53:01	170	1	9	9	QLNDTIHLH	QLNDTIHLH	QLNDTIHLH	0.002849	5.9
HLA-B*58:01	108	1	9	9	LYDRLASTV	LYDRLASTV	LYDRLASTV	0.002847	8
HLA-B*44:03	160	1	9	9	NQNALVCGL	NQNALVCGL	NQNALVCGL	0.002842	5.1
HLA-A*32:01	171	1	9	9	TQALQLFLR	TQALQLFLR	TQALQLFLR	0.00284	6.5
HLA-A*68:01	97	1	9	9	AAGIAWIPY	AAGIAWIPY	AAGIAWIPY	0.00283	11
HLA-A*02:06	61	1	9	9	ILNRKAIDF	ILNRKAIDF	ILNRKAIDF	0.002829	13
HLA-A*31:01	84	1	9	9	AFHKDGAFF	AFHKDGAFF	AFHKDGAFF	0.002828	11
HLA-A*33:01	119	1	9	9	QWIPAGIGI	QWIPAGIGI	QWIPAGIGI	0.002816	8.5
HLA-A*68:02	87	1	9	9	NADIGEWAF	NADIGEWAF	NADIGEWAF	0.002816	9.5
HLA-A*02:06	14	1	9	9	AENCYNLEI	AENCYNLEI	AENCYNLEI	0.002812	13
HLA-A*30:02	81	1	9	9	VWVIILFQK	VWVIILFQK	VWVIILFQK	0.002811	14
HLA-B*51:01	1	1	9	9	YTENTSSYY	YTENTSSYY	YTENTSSYY	0.0028	12
HLA-A*30:02	158	1	9	9	LITSTVTGI	LITSTVTGI	LITSTVTGI	0.002789	14
HLA-A*33:01	47	1	9	9	RPHTPQFLF	RPHTPQFLF	RPHTPQFLF	0.002781	8.6
HLA-A*26:01	157	1	9	9	ITKGRISDR	ITKGRISDR	ITKGRISDR	0.002776	6.6
HLA-B*44:02	93	1	9	9	STDIPSATK	STDIPSATK	STDIPSATK	0.002776	4.9
HLA-A*02:06	140	1	9	9	KFRKSSFFV	KFRKSSFFV	KFRKSSFFV	0.002773	13
HLA-A*68:02	30	1	9	9	VIAFLILAK	VIAFLILAK	VIAFLILAK	0.002765	9.6
HLA-A*68:02	120	1	9	9	LFLRATTEL	LFLRATTEL	LFLRATTEL	0.002759	9.6
HLA-B*57:01	67	1	9	9	EVTEIDQLV	EVTEIDQLV	EVTEIDQLV	0.002758	12
HLA-B*44:02	87	1	9	9	NADIGEWAF	NADIGEWAF	NADIGEWAF	0.002746	5
HLA-A*32:01	174	1	9	9	GIYTEGLMH	GIYTEGLMH	GIYTEGLMH	0.002745	6.6
HLA-B*07:02	132	1	9	9	RATTELRTY	RATTELRTY	RATTELRTY	0.002741	7.2
HLA-A*02:01	64	1	9	9	AGIAWIPYF	AGIAWIPYF	AGIAWIPYF	0.002735	9
HLA-A*11:01	47	1	9	9	RPHTPQFLF	RPHTPQFLF	RPHTPQFLF	0.002729	6.8
HLA-A*23:01	55	1	9	9	FGAQHSTTL	FGAQHSTTL	FGAQHSTTL	0.002728	5.4
HLA-B*08:01	3	1	9	9	ISDRATRKY	ISDRATRKY	ISDRATRKY	0.002726	12
HLA-B*57:01	119	1	9	9	QWIPAGIGI	QWIPAGIGI	QWIPAGIGI	0.002725	12
HLA-A*33:01	182	1	9	9	QLPRDKFRK	QLPRDKFRK	QLPRDKFRK	0.002724	8.7
HLA-B*40:01	114	1	9	9	SQIPSSSPT	SQIPSSSPT	SQIPSSSPT	0.002721	4.8
HLA-A*30:02	51	1	9	9	FLYDRLAST	FLYDRLAST	FLYDRLAST	0.00272	14
HLA-A*02:01	129	1	9	9	KIDNNTFVR	KIDNNTFVR	KIDNNTFVR	0.002705	9.1
HLA-A*32:01	136	1	9	9	ALLCVCKLL	ALLCVCKLL	ALLCVCKLL	0.002693	6.7
HLA-A*30:01	53	1	9	9	LVPKNSPGM	LVPKNSPGM	LVPKNSPGM	0.00268	17
HLA-B*44:03	93	1	9	9	STDIPSATK	STDIPSATK	STDIPSATK	0.002679	5.3
HLA-B*53:01	86	1	9	9	DHLASTDQL	DHLASTDQL	DHLASTDQL	0.002672	6
HLA-A*03:01	60	1	9	9	TVIYRGVNF	TVIYRGVNF	TVIYRGVNF	0.002663	8
HLA-B*57:01	37	1	9	9	AQHSTTLFK	AQHSTTLFK	AQHSTTLFK	0.002645	12
HLA-B*40:01	46	1	9	9	DTIHLHQQL	DTIHLHQQL	DTIHLHQQL	0.002634	4.9
HLA-A*30:01	69	1	9	9	EWAENCYNL	EWAENCYNL	EWAENCYNL	0.002633	17
HLA-A*26:01	150	1	9	9	FRKSSFFVW	FRKSSFFVW	FRKSSFFVW	0.002624	6.8
HLA-A*33:01	15	1	9	9	KCNPNLHYW	KCNPNLHYW	KCNPNLHYW	0.002619	8.8
HLA-B*51:01	36	1	9	9	QLRGEELSF	QLRGEELSF	QLRGEELSF	0.002618	12
HLA-A*02:03	176	1	9	9	LLQLPRDKF	LLQLPRDKF	LLQLPRDKF	0.002613	11
HLA-A*26:01	98	1	9	9	KAFSMPLGV	KAFSMPLGV	KAFSMPLGV	0.002613	6.8
HLA-A*01:01	31	1	9	9	IPSSSPTTA	IPSSSPTTA	IPSSSPTTA	0.002611	8.2
HLA-A*26:01	32	1	9	9	HLASTDQLK	HLASTDQLK	HLASTDQLK	0.00261	6.8
HLA-A*01:01	75	1	9	9	ITTAVKTVL	ITTAVKTVL	ITTAVKTVL	0.002595	8.2
HLA-B*44:02	160	1	9	9	NQNALVCGL	NQNALVCGL	NQNALVCGL	0.002577	5.1
HLA-A*02:06	9	1	9	9	ETTQALQLF	ETTQALQLF	ETTQALQLF	0.002574	14
HLA-A*03:01	97	1	9	9	AAGIAWIPY	AAGIAWIPY	AAGIAWIPY	0.002561	8.1
HLA-A*68:01	131	1	9	9	ITSTVTGIL	ITSTVTGIL	ITSTVTGIL	0.002557	11
HLA-A*02:01	119	1	9	9	QWIPAGIGI	QWIPAGIGI	QWIPAGIGI	0.002556	9.3
HLA-B*35:01	177	1	9	9	LPRDKFRKS	LPRDKFRKS	LPRDKFRKS	0.002553	6.9
HLA-B*15:01	49	1	9	9	THTSGPSVM	THTSGPSVM	THTSGPSVM	0.00255	9.5
HLA-B*58:01	142	1	9	9	HIPEGETTL	HIPEGETTL	HIPEGETTL	0.002545	8.5
HLA-A*03:01	51	1	9	9	FLYDRLAST	FLYDRLAST	FLYDRLAST	0.002544	8.1
HLA-B*58:01	143	1	9	9	TVTGILGSL	TVTGILGSL	TVTGILGSL	0.00254	8.5
HLA-B*40:01	59	1	9	9	FAEGVIAFL	FAEGVIAFL	FAEGVIAFL	0.002538	5
HLA-B*44:02	72	1	9	9	SPGMVPLHI	SPGMVPLHI	SPGMVPLHI	0.002536	5.2
HLA-B*53:01	120	1	9	9	LFLRATTEL	LFLRATTEL	LFLRATTEL	0.00252	6.2
HLA-A*30:01	58	1	9	9	VIILFQKAF	VIILFQKAF	VIILFQKAF	0.002518	18
HLA-B*08:01	145	1	9	9	FKIDNNTFV	FKIDNNTFV	FKIDNNTFV	0.00251	13
HLA-A*32:01	101	1	9	9	SLLQLPRDK	SLLQLPRDK	SLLQLPRDK	0.00251	6.9
HLA-A*68:01	44	1	9	9	KINQIIHDF	KINQIIHDF	KINQIIHDF	0.002509	12
HLA-B*15:01	4	1	9	9	FHKDGAFFL	FHKDGAFFL	FHKDGAFFL	0.002502	9.5
HLA-A*02:01	180	1	9	9	FLRATTELR	FLRATTELR	FLRATTELR	0.002492	9.4
HLA-A*31:01	120	1	9	9	LFLRATTEL	LFLRATTEL	LFLRATTEL	0.002491	12
HLA-A*02:03	60	1	9	9	TVIYRGVNF	TVIYRGVNF	TVIYRGVNF	0.002486	11
HLA-A*24:02	49	1	9	9	THTSGPSVM	THTSGPSVM	THTSGPSVM	0.002483	5.6
HLA-B*58:01	120	1	9	9	LFLRATTEL	LFLRATTEL	LFLRATTEL	0.002481	8.6
HLA-A*02:03	70	1	9	9	ETAATIIGT	ETAATIIGT	ETAATIIGT	0.002475	11
HLA-A*31:01	46	1	9	9	DTIHLHQQL	DTIHLHQQL	DTIHLHQQL	0.002475	12
HLA-B*07:02	93	1	9	9	STDIPSATK	STDIPSATK	STDIPSATK	0.002462	7.6
HLA-A*01:01	168	1	9	9	QLKSVGLNL	QLKSVGLNL	QLKSVGLNL	0.002448	8.5
HLA-A*31:01	3	1	9	9	ISDRATRKY	ISDRATRKY	ISDRATRKY	0.002446	12
HLA-B*44:03	2	1	9	9	TSSYYATSY	TSSYYATSY	TSSYYATSY	0.002444	5.5
HLA-B*58:01	72	1	9	9	SPGMVPLHI	SPGMVPLHI	SPGMVPLHI	0.002443	8.6
HLA-B*51:01	176	1	9	9	LLQLPRDKF	LLQLPRDKF	LLQLPRDKF	0.002441	13
HLA-B*51:01	44	1	9	9	KINQIIHDF	KINQIIHDF	KINQIIHDF	0.002439	13
HLA-A*26:01	73	1	9	9	QTNTKATGK	QTNTKATGK	QTNTKATGK	0.002435	7
HLA-B*08:01	9	1	9	9	ETTQALQLF	ETTQALQLF	ETTQALQLF	0.002431	13
HLA-A*01:01	41	1	9	9	RSRRQTNTK	RSRRQTNTK	RSRRQTNTK	0.002429	8.6
HLA-B*44:02	2	1	9	9	TSSYYATSY	TSSYYATSY	TSSYYATSY	0.002428	5.3
HLA-B*51:01	160	1	9	9	NQNALVCGL	NQNALVCGL	NQNALVCGL	0.002418	13
HLA-A*26:01	176	1	9	9	LLQLPRDKF	LLQLPRDKF	LLQLPRDKF	0.002414	7.1
HLA-A*33:01	140	1	9	9	KFRKSSFFV	KFRKSSFFV	KFRKSSFFV	0.002411	9.2
HLA-B*44:03	4	1	9	9	FHKDGAFFL	FHKDGAFFL	FHKDGAFFL	0.00241	5.5
HLA-A*23:01	146	1	9	9	TTELRTYTI	TTELRTYTI	TTELRTYTI	0.002401	5.7
HLA-A*02:06	22	1	9	9	TPENITTAV	TPENITTAV	TPENITTAV	0.002397	14
HLA-B*40:01	142	1	9	9	HIPEGETTL	HIPEGETTL	HIPEGETTL	0.002395	5.1
HLA-B*51:01	150	1	9	9	FRKSSFFVW	FRKSSFFVW	FRKSSFFVW	0.00239	13
HLA-A*01:01	84	1	9	9	AFHKDGAFF	AFHKDGAFF	AFHKDGAFF	0.002389	8.6
HLA-A*33:01	19	1	9	9	ILGSLGLRK	ILGSLGLRK	ILGSLGLRK	0.002385	9.2
HLA-A*30:02	8	1	9	9	IHDFIDNPL	IHDFIDNPL	IHDFIDNPL	0.002378	15
HLA-B*51:01	183	1	9	9	QESTSNGLI	QESTSNGLI	QESTSNGLI	0.002377	13
HLA-B*57:01	142	1	9	9	HIPEGETTL	HIPEGETTL	HIPEGETTL	0.00237	13
HLA-A*01:01	53	1	9	9	LVPKNSPGM	LVPKNSPGM	LVPKNSPGM	0.002349	8.7
HLA-B*40:01	96	1	9	9	GPTTEAPTL	GPTTEAPTL	GPTTEAPTL	0.002345	5.2
HLA-A*01:01	4	1	9	9	FHKDGAFFL	FHKDGAFFL	FHKDGAFFL	0.002332	8.8
HLA-A*68:01	142	1	9	9	HIPEGETTL	HIPEGETTL	HIPEGETTL	0.002331	12
HLA-A*31:01	2	1	9	9	TSSYYATSY	TSSYYATSY	TSSYYATSY	0.002324	12
HLA-A*11:01	179	1	9	9	NYTENTSSY	NYTENTSSY	NYTENTSSY	0.00232	7.2
HLA-B*58:01	53	1	9	9	LVPKNSPGM	LVPKNSPGM	LVPKNSPGM	0.00232	8.9
HLA-A*68:02	29	1	9	9	NETTQALQL	NETTQALQL	NETTQALQL	0.002318	11
HLA-A*26:01	22	1	9	9	TPENITTAV	TPENITTAV	TPENITTAV	0.002307	7.3
HLA-B*15:01	12	1	9	9	FFVWVIILF	FFVWVIILF	FFVWVIILF	0.002307	9.9
HLA-A*33:01	2	1	9	9	TSSYYATSY	TSSYYATSY	TSSYYATSY	0.002294	9.4
HLA-A*68:02	109	1	9	9	GLMHNQNAL	GLMHNQNAL	GLMHNQNAL	0.002284	11
HLA-A*32:01	32	1	9	9	HLASTDQLK	HLASTDQLK	HLASTDQLK	0.002279	7.2
HLA-A*01:01	184	1	9	9	QHNAAGIAW	QHNAAGIAW	QHNAAGIAW	0.002278	8.9
HLA-B*53:01	163	1	9	9	YTILNRKAI	YTILNRKAI	YTILNRKAI	0.002277	6.5
HLA-B*35:01	150	1	9	9	FRKSSFFVW	FRKSSFFVW	FRKSSFFVW	0.002265	7.2
HLA-A*03:01	126	1	9	9	HTPQFLFQL	HTPQFLFQL	HTPQFLFQL	0.002262	8.5
HLA-A*30:01	61	1	9	9	ILNRKAIDF	ILNRKAIDF	ILNRKAIDF	0.00226	19
HLA-A*02:01	37	1	9	9	AQHSTTLFK	AQHSTTLFK	AQHSTTLFK	0.002258	9.8
HLA-A*23:01	27	1	9	9	VVSYEAGEW	VVSYEAGEW	VVSYEAGEW	0.00225	5.9
HLA-A*23:01	20	1	9	9	TELRTYTIL	TELRTYTIL	TELRTYTIL	0.002247	5.9
HLA-A*02:03	120	1	9	9	LFLRATTEL	LFLRATTEL	LFLRATTEL	0.002246	12
HLA-B*44:02	77	1	9	9	LFKIDNNTF	LFKIDNNTF	LFKIDNNTF	0.002237	5.5
HLA-A*26:01	145	1	9	9	FKIDNNTFV	FKIDNNTFV	FKIDNNTFV	0.002234	7.4
HLA-B*44:02	48	1	9	9	LANETTQAL	LANETTQAL	LANETTQAL	0.002234	5.5
HLA-B*35:01	113	1	9	9	TTQALQLFL	TTQALQLFL	TTQALQLFL	0.002227	7.3
HLA-B*15:01	113	1	9	9	TTQALQLFL	TTQALQLFL	TTQALQLFL	0.002227	11
HLA-A*02:06	10	1	9	9	AEGIYTEGL	AEGIYTEGL	AEGIYTEGL	0.002226	15
HLA-B*57:01	134	1	9	9	TTPENITTA	TTPENITTA	TTPENITTA	0.002223	13
HLA-A*33:01	75	1	9	9	ITTAVKTVL	ITTAVKTVL	ITTAVKTVL	0.00222	9.5
HLA-B*08:01	141	1	9	9	GITGIIIAI	GITGIIIAI	GITGIIIAI	0.002215	14
HLA-B*44:02	49	1	9	9	THTSGPSVM	THTSGPSVM	THTSGPSVM	0.00221	5.5
HLA-A*23:01	130	1	9	9	NINADIGEW	NINADIGEW	NINADIGEW	0.002205	5.9
HLA-B*44:03	87	1	9	9	NADIGEWAF	NADIGEWAF	NADIGEWAF	0.002204	5.7
HLA-A*32:01	53	1	9	9	LVPKNSPGM	LVPKNSPGM	LVPKNSPGM	0.0022	7.3
HLA-A*30:02	146	1	9	9	TTELRTYTI	TTELRTYTI	TTELRTYTI	0.002198	16
HLA-B*07:02	45	1	9	9	FQLNDTIHL	FQLNDTIHL	FQLNDTIHL	0.002183	8.1
HLA-A*26:01	49	1	9	9	THTSGPSVM	THTSGPSVM	THTSGPSVM	0.002178	7.5
HLA-B*07:02	7	1	9	9	GEELSFEAL	GEELSFEAL	GEELSFEAL	0.002169	8.1
HLA-B*35:01	8	1	9	9	IHDFIDNPL	IHDFIDNPL	IHDFIDNPL	0.002162	7.4
HLA-B*57:01	137	1	9	9	YTEGLMHNQ	YTEGLMHNQ	YTEGLMHNQ	0.002147	14
HLA-A*30:02	137	1	9	9	YTEGLMHNQ	YTEGLMHNQ	YTEGLMHNQ	0.002141	16
HLA-A*33:01	26	1	9	9	FQKAFSMPL	FQKAFSMPL	FQKAFSMPL	0.002134	9.7
HLA-B*53:01	123	1	9	9	VVTNSTLEV	VVTNSTLEV	VVTNSTLEV	0.002132	6.7
HLA-A*30:01	99	1	9	9	TIIGTNGNH	TIIGTNGNH	TIIGTNGNH	0.00213	19
HLA-B*15:01	23	1	9	9	RISDRATRK	RISDRATRK	RISDRATRK	0.002127	11
HLA-A*03:01	61	1	9	9	ILNRKAIDF	ILNRKAIDF	ILNRKAIDF	0.002123	8.7
HLA-B*51:01	162	1	9	9	RATRKYSDL	RATRKYSDL	RATRKYSDL	0.002115	14
HLA-A*01:01	23	1	9	9	RISDRATRK	RISDRATRK	RISDRATRK	0.002112	9.3
HLA-A*30:01	108	1	9	9	LYDRLASTV	LYDRLASTV	LYDRLASTV	0.002109	19
HLA-B*44:03	86	1	9	9	DHLASTDQL	DHLASTDQL	DHLASTDQL	0.002104	5.8
HLA-B*40:01	82	1	9	9	GVPPKVVSY	GVPPKVVSY	GVPPKVVSY	0.002102	5.4
HLA-A*03:01	113	1	9	9	TTQALQLFL	TTQALQLFL	TTQALQLFL	0.002101	8.7
HLA-A*02:06	7	1	9	9	GEELSFEAL	GEELSFEAL	GEELSFEAL	0.002092	15
HLA-A*02:01	58	1	9	9	VIILFQKAF	VIILFQKAF	VIILFQKAF	0.002088	11
HLA-A*24:02	72	1	9	9	SPGMVPLHI	SPGMVPLHI	SPGMVPLHI	0.002087	6
HLA-A*33:01	120	1	9	9	LFLRATTEL	LFLRATTEL	LFLRATTEL	0.002065	9.8
HLA-B*07:02	179	1	9	9	NYTENTSSY	NYTENTSSY	NYTENTSSY	0.002062	8.3
HLA-A*30:01	177	1	9	9	LPRDKFRKS	LPRDKFRKS	LPRDKFRKS	0.00206	19
HLA-A*24:02	27	1	9	9	VVSYEAGEW	VVSYEAGEW	VVSYEAGEW	0.002053	6.1
HLA-A*02:01	140	1	9	9	KFRKSSFFV	KFRKSSFFV	KFRKSSFFV	0.002047	11
HLA-B*40:01	87	1	9	9	NADIGEWAF	NADIGEWAF	NADIGEWAF	0.002042	5.5
HLA-A*03:01	123	1	9	9	VVTNSTLEV	VVTNSTLEV	VVTNSTLEV	0.002036	8.8
HLA-B*58:01	140	1	9	9	KFRKSSFFV	KFRKSSFFV	KFRKSSFFV	0.00203	9.5
HLA-B*35:01	34	1	9	9	SEQLRGEEL	SEQLRGEEL	SEQLRGEEL	0.00202	7.6
HLA-B*15:01	32	1	9	9	HLASTDQLK	HLASTDQLK	HLASTDQLK	0.002017	11
HLA-A*32:01	19	1	9	9	ILGSLGLRK	ILGSLGLRK	ILGSLGLRK	0.002017	7.6
HLA-B*40:01	93	1	9	9	STDIPSATK	STDIPSATK	STDIPSATK	0.002016	5.5
HLA-B*08:01	175	1	9	9	LPSQNSTEG	LPSQNSTEG	LPSQNSTEG	0.002015	14
HLA-A*30:02	59	1	9	9	FAEGVIAFL	FAEGVIAFL	FAEGVIAFL	0.00201	17
HLA-A*30:02	163	1	9	9	YTILNRKAI	YTILNRKAI	YTILNRKAI	0.002009	17
HLA-A*30:01	72	1	9	9	SPGMVPLHI	SPGMVPLHI	SPGMVPLHI	0.002001	20
HLA-B*44:02	168	1	9	9	QLKSVGLNL	QLKSVGLNL	QLKSVGLNL	0.001994	5.8
HLA-B*07:02	51	1	9	9	FLYDRLAST	FLYDRLAST	FLYDRLAST	0.001994	8.5
HLA-B*57:01	31	1	9	9	IPSSSPTTA	IPSSSPTTA	IPSSSPTTA	0.001991	14
HLA-A*26:01	4	1	9	9	FHKDGAFFL	FHKDGAFFL	FHKDGAFFL	0.001989	7.8
HLA-A*68:02	39	1	9	9	VPKNSPGMV	VPKNSPGMV	VPKNSPGMV	0.001987	12
HLA-A*02:01	11	1	9	9	HKDGAFFLY	HKDGAFFLY	HKDGAFFLY	0.001986	11
HLA-B*15:01	145	1	9	9	FKIDNNTFV	FKIDNNTFV	FKIDNNTFV	0.001983	11
HLA-A*30:01	65	1	9	9	NFAEGVIAF	NFAEGVIAF	NFAEGVIAF	0.001982	20
HLA-A*32:01	51	1	9	9	FLYDRLAST	FLYDRLAST	FLYDRLAST	0.00198	7.7
HLA-B*08:01	11	1	9	9	HKDGAFFLY	HKDGAFFLY	HKDGAFFLY	0.001973	14
HLA-A*26:01	171	1	9	9	TQALQLFLR	TQALQLFLR	TQALQLFLR	0.001972	7.8
HLA-B*53:01	61	1	9	9	ILNRKAIDF	ILNRKAIDF	ILNRKAIDF	0.001969	6.9
HLA-B*40:01	170	1	9	9	QLNDTIHLH	QLNDTIHLH	QLNDTIHLH	0.001968	5.6
HLA-B*35:01	52	1	9	9	IIIAIIALL	IIIAIIALL	IIIAIIALL	0.001967	7.7
HLA-A*02:06	174	1	9	9	GIYTEGLMH	GIYTEGLMH	GIYTEGLMH	0.001959	15
HLA-A*30:01	142	1	9	9	HIPEGETTL	HIPEGETTL	HIPEGETTL	0.001958	20
HLA-B*40:01	98	1	9	9	KAFSMPLGV	KAFSMPLGV	KAFSMPLGV	0.001958	5.6
HLA-B*07:02	77	1	9	9	LFKIDNNTF	LFKIDNNTF	LFKIDNNTF	0.001957	8.6
HLA-B*35:01	20	1	9	9	TELRTYTIL	TELRTYTIL	TELRTYTIL	0.001949	7.7
HLA-B*44:02	60	1	9	9	TVIYRGVNF	TVIYRGVNF	TVIYRGVNF	0.001946	5.9
HLA-A*68:02	24	1	9	9	RLASTVIYR	RLASTVIYR	RLASTVIYR	0.001945	12
HLA-A*02:03	17	1	9	9	RTYTILNRK	RTYTILNRK	RTYTILNRK	0.001945	12
HLA-A*11:01	64	1	9	9	AGIAWIPYF	AGIAWIPYF	AGIAWIPYF	0.00194	7.6
HLA-A*30:01	38	1	9	9	YAFHKDGAF	YAFHKDGAF	YAFHKDGAF	0.001938	20
HLA-A*31:01	134	1	9	9	TTPENITTA	TTPENITTA	TTPENITTA	0.001936	13
HLA-A*33:01	168	1	9	9	QLKSVGLNL	QLKSVGLNL	QLKSVGLNL	0.001932	10
HLA-B*08:01	67	1	9	9	EVTEIDQLV	EVTEIDQLV	EVTEIDQLV	0.001932	15
HLA-A*33:01	99	1	9	9	TIIGTNGNH	TIIGTNGNH	TIIGTNGNH	0.001929	10
HLA-B*08:01	136	1	9	9	ALLCVCKLL	ALLCVCKLL	ALLCVCKLL	0.001924	15
HLA-B*57:01	141	1	9	9	GITGIIIAI	GITGIIIAI	GITGIIIAI	0.001922	14
HLA-A*23:01	26	1	9	9	FQKAFSMPL	FQKAFSMPL	FQKAFSMPL	0.00192	6.3
HLA-A*03:01	179	1	9	9	NYTENTSSY	NYTENTSSY	NYTENTSSY	0.001914	9
HLA-A*68:01	66	1	9	9	ILAKPKETF	ILAKPKETF	ILAKPKETF	0.001908	13
HLA-B*07:02	1	1	9	9	YTENTSSYY	YTENTSSYY	YTENTSSYY	0.001908	8.7
HLA-A*02:01	131	1	9	9	ITSTVTGIL	ITSTVTGIL	ITSTVTGIL	0.001899	11
HLA-A*30:01	70	1	9	9	ETAATIIGT	ETAATIIGT	ETAATIIGT	0.001894	20
HLA-A*33:01	101	1	9	9	SLLQLPRDK	SLLQLPRDK	SLLQLPRDK	0.001893	11
HLA-A*11:01	137	1	9	9	YTEGLMHNQ	YTEGLMHNQ	YTEGLMHNQ	0.001891	7.7
HLA-A*02:01	5	1	9	9	YYATSYLEY	YYATSYLEY	YYATSYLEY	0.001891	11
HLA-A*11:01	123	1	9	9	VVTNSTLEV	VVTNSTLEV	VVTNSTLEV	0.00189	7.7
HLA-A*30:01	158	1	9	9	LITSTVTGI	LITSTVTGI	LITSTVTGI	0.001886	20
HLA-A*11:01	83	1	9	9	ILFQKAFSM	ILFQKAFSM	ILFQKAFSM	0.001876	7.7
HLA-B*44:03	27	1	9	9	VVSYEAGEW	VVSYEAGEW	VVSYEAGEW	0.001876	6.1
HLA-A*33:01	143	1	9	9	TVTGILGSL	TVTGILGSL	TVTGILGSL	0.00186	11
HLA-A*31:01	1	1	9	9	YTENTSSYY	YTENTSSYY	YTENTSSYY	0.00186	13
HLA-A*30:02	34	1	9	9	SEQLRGEEL	SEQLRGEEL	SEQLRGEEL	0.001852	18
HLA-A*30:02	67	1	9	9	EVTEIDQLV	EVTEIDQLV	EVTEIDQLV	0.001848	18
HLA-A*31:01	26	1	9	9	FQKAFSMPL	FQKAFSMPL	FQKAFSMPL	0.001839	13
HLA-A*30:02	31	1	9	9	IPSSSPTTA	IPSSSPTTA	IPSSSPTTA	0.001838	18
HLA-A*31:01	99	1	9	9	TIIGTNGNH	TIIGTNGNH	TIIGTNGNH	0.001834	13
HLA-B*35:01	98	1	9	9	KAFSMPLGV	KAFSMPLGV	KAFSMPLGV	0.001833	7.9
HLA-B*35:01	28	1	9	9	ITDKINQII	ITDKINQII	ITDKINQII	0.001832	7.9
HLA-A*31:01	45	1	9	9	FQLNDTIHL	FQLNDTIHL	FQLNDTIHL	0.001822	13
HLA-A*33:01	64	1	9	9	AGIAWIPYF	AGIAWIPYF	AGIAWIPYF	0.001821	11
HLA-A*26:01	158	1	9	9	LITSTVTGI	LITSTVTGI	LITSTVTGI	0.001808	8.2
HLA-A*26:01	119	1	9	9	QWIPAGIGI	QWIPAGIGI	QWIPAGIGI	0.001807	8.2
HLA-B*44:02	96	1	9	9	GPTTEAPTL	GPTTEAPTL	GPTTEAPTL	0.001788	6.1
HLA-A*31:01	75	1	9	9	ITTAVKTVL	ITTAVKTVL	ITTAVKTVL	0.001786	13
HLA-A*02:01	1	1	9	9	YTENTSSYY	YTENTSSYY	YTENTSSYY	0.001786	11
HLA-B*58:01	67	1	9	9	EVTEIDQLV	EVTEIDQLV	EVTEIDQLV	0.001783	11
HLA-B*40:01	125	1	9	9	GAQHSTTLF	GAQHSTTLF	GAQHSTTLF	0.001779	5.8
HLA-A*02:06	180	1	9	9	FLRATTELR	FLRATTELR	FLRATTELR	0.001776	16
HLA-A*31:01	77	1	9	9	LFKIDNNTF	LFKIDNNTF	LFKIDNNTF	0.001773	13
HLA-A*68:02	8	1	9	9	IHDFIDNPL	IHDFIDNPL	IHDFIDNPL	0.001763	12
HLA-B*57:01	124	1	9	9	LIWTLDANI	LIWTLDANI	LIWTLDANI	0.001759	15
HLA-A*32:01	8	1	9	9	IHDFIDNPL	IHDFIDNPL	IHDFIDNPL	0.001756	8.1
HLA-B*08:01	125	1	9	9	GAQHSTTLF	GAQHSTTLF	GAQHSTTLF	0.001752	15
HLA-A*23:01	72	1	9	9	SPGMVPLHI	SPGMVPLHI	SPGMVPLHI	0.001752	6.5
HLA-B*40:01	44	1	9	9	KINQIIHDF	KINQIIHDF	KINQIIHDF	0.001751	5.9
HLA-B*57:01	73	1	9	9	QTNTKATGK	QTNTKATGK	QTNTKATGK	0.001745	15
HLA-B*44:02	90	1	9	9	GPCPGDYAF	GPCPGDYAF	GPCPGDYAF	0.001744	6.2
HLA-B*08:01	132	1	9	9	RATTELRTY	RATTELRTY	RATTELRTY	0.00174	15
HLA-B*51:01	115	1	9	9	QEQHNAAGI	QEQHNAAGI	QEQHNAAGI	0.001739	15
HLA-B*44:03	38	1	9	9	YAFHKDGAF	YAFHKDGAF	YAFHKDGAF	0.001737	6.3
HLA-A*68:02	20	1	9	9	TELRTYTIL	TELRTYTIL	TELRTYTIL	0.001737	12
HLA-B*35:01	166	1	9	9	TTGRLIWTL	TTGRLIWTL	TTGRLIWTL	0.001733	8.1
HLA-A*30:01	160	1	9	9	NQNALVCGL	NQNALVCGL	NQNALVCGL	0.001733	21
HLA-A*32:01	4	1	9	9	FHKDGAFFL	FHKDGAFFL	FHKDGAFFL	0.001732	8.2
HLA-A*68:02	40	1	9	9	SFFVWVIIL	SFFVWVIIL	SFFVWVIIL	0.001729	12
HLA-A*32:01	20	1	9	9	TELRTYTIL	TELRTYTIL	TELRTYTIL	0.001724	8.2
HLA-B*53:01	34	1	9	9	SEQLRGEEL	SEQLRGEEL	SEQLRGEEL	0.001723	7.3
HLA-A*11:01	134	1	9	9	TTPENITTA	TTPENITTA	TTPENITTA	0.001719	8
HLA-A*01:01	72	1	9	9	SPGMVPLHI	SPGMVPLHI	SPGMVPLHI	0.001719	11
HLA-B*08:01	1	1	9	9	YTENTSSYY	YTENTSSYY	YTENTSSYY	0.001718	15
HLA-B*15:01	134	1	9	9	TTPENITTA	TTPENITTA	TTPENITTA	0.001717	12
HLA-A*30:01	145	1	9	9	FKIDNNTFV	FKIDNNTFV	FKIDNNTFV	0.001715	21
HLA-A*33:01	108	1	9	9	LYDRLASTV	LYDRLASTV	LYDRLASTV	0.001715	11
HLA-B*08:01	104	1	9	9	IPYFGPGAE	IPYFGPGAE	IPYFGPGAE	0.00171	15
HLA-A*33:01	66	1	9	9	ILAKPKETF	ILAKPKETF	ILAKPKETF	0.001703	11
HLA-A*24:02	25	1	9	9	AEGVIAFLI	AEGVIAFLI	AEGVIAFLI	0.001703	6.6
HLA-A*31:01	58	1	9	9	VIILFQKAF	VIILFQKAF	VIILFQKAF	0.001702	13
HLA-A*68:01	15	1	9	9	KCNPNLHYW	KCNPNLHYW	KCNPNLHYW	0.001692	13
HLA-A*01:01	180	1	9	9	FLRATTELR	FLRATTELR	FLRATTELR	0.001691	11
HLA-B*07:02	119	1	9	9	QWIPAGIGI	QWIPAGIGI	QWIPAGIGI	0.00169	9.2
HLA-A*24:02	20	1	9	9	TELRTYTIL	TELRTYTIL	TELRTYTIL	0.001686	6.6
HLA-B*51:01	27	1	9	9	VVSYEAGEW	VVSYEAGEW	VVSYEAGEW	0.001684	15
HLA-A*26:01	69	1	9	9	EWAENCYNL	EWAENCYNL	EWAENCYNL	0.001678	8.5
HLA-B*44:02	176	1	9	9	LLQLPRDKF	LLQLPRDKF	LLQLPRDKF	0.001676	6.3
HLA-A*02:01	32	1	9	9	HLASTDQLK	HLASTDQLK	HLASTDQLK	0.00167	12
HLA-B*07:02	20	1	9	9	TELRTYTIL	TELRTYTIL	TELRTYTIL	0.001666	9.2
HLA-A*03:01	15	1	9	9	KCNPNLHYW	KCNPNLHYW	KCNPNLHYW	0.001666	9.5
HLA-A*68:02	73	1	9	9	QTNTKATGK	QTNTKATGK	QTNTKATGK	0.001661	13
HLA-B*44:02	4	1	9	9	FHKDGAFFL	FHKDGAFFL	FHKDGAFFL	0.001661	6.4
HLA-A*02:03	146	1	9	9	TTELRTYTI	TTELRTYTI	TTELRTYTI	0.001659	13
HLA-A*33:01	44	1	9	9	KINQIIHDF	KINQIIHDF	KINQIIHDF	0.001659	11
HLA-A*02:06	130	1	9	9	NINADIGEW	NINADIGEW	NINADIGEW	0.001655	16
HLA-A*01:01	18	1	9	9	KSSFFVWVI	KSSFFVWVI	KSSFFVWVI	0.001655	11
HLA-A*26:01	114	1	9	9	SQIPSSSPT	SQIPSSSPT	SQIPSSSPT	0.001653	8.5
HLA-B*51:01	117	1	9	9	YLEYEIENF	YLEYEIENF	YLEYEIENF	0.00164	15
HLA-A*02:06	72	1	9	9	SPGMVPLHI	SPGMVPLHI	SPGMVPLHI	0.00164	16
HLA-A*26:01	146	1	9	9	TTELRTYTI	TTELRTYTI	TTELRTYTI	0.001638	8.6
HLA-B*08:01	131	1	9	9	ITSTVTGIL	ITSTVTGIL	ITSTVTGIL	0.001638	16
HLA-B*15:01	59	1	9	9	FAEGVIAFL	FAEGVIAFL	FAEGVIAFL	0.001633	12
HLA-A*31:01	36	1	9	9	QLRGEELSF	QLRGEELSF	QLRGEELSF	0.001629	13
HLA-B*53:01	168	1	9	9	QLKSVGLNL	QLKSVGLNL	QLKSVGLNL	0.001627	7.5
HLA-A*68:02	86	1	9	9	DHLASTDQL	DHLASTDQL	DHLASTDQL	0.001622	13
HLA-B*58:01	119	1	9	9	QWIPAGIGI	QWIPAGIGI	QWIPAGIGI	0.001619	11
HLA-B*07:02	114	1	9	9	SQIPSSSPT	SQIPSSSPT	SQIPSSSPT	0.001619	9.4
HLA-A*68:02	27	1	9	9	VVSYEAGEW	VVSYEAGEW	VVSYEAGEW	0.001617	13
HLA-A*30:02	69	1	9	9	EWAENCYNL	EWAENCYNL	EWAENCYNL	0.001615	19
HLA-A*02:06	184	1	9	9	QHNAAGIAW	QHNAAGIAW	QHNAAGIAW	0.001607	17
HLA-A*26:01	118	1	9	9	KNSPGMVPL	KNSPGMVPL	KNSPGMVPL	0.001605	8.7
HLA-B*44:03	168	1	9	9	QLKSVGLNL	QLKSVGLNL	QLKSVGLNL	0.001603	6.6
HLA-B*40:01	105	1	9	9	SSYYATSYL	SSYYATSYL	SSYYATSYL	0.0016	6.1
HLA-A*31:01	150	1	9	9	FRKSSFFVW	FRKSSFFVW	FRKSSFFVW	0.001598	14
HLA-A*02:03	54	1	9	9	ETITETAAT	ETITETAAT	ETITETAAT	0.001593	13
HLA-B*35:01	123	1	9	9	VVTNSTLEV	VVTNSTLEV	VVTNSTLEV	0.001592	8.3
HLA-B*53:01	93	1	9	9	STDIPSATK	STDIPSATK	STDIPSATK	0.001591	7.6
HLA-A*68:02	96	1	9	9	GPTTEAPTL	GPTTEAPTL	GPTTEAPTL	0.001589	13
HLA-A*30:02	72	1	9	9	SPGMVPLHI	SPGMVPLHI	SPGMVPLHI	0.001589	19
HLA-B*58:01	141	1	9	9	GITGIIIAI	GITGIIIAI	GITGIIIAI	0.001588	11
HLA-A*24:02	34	1	9	9	SEQLRGEEL	SEQLRGEEL	SEQLRGEEL	0.001586	6.7
HLA-A*31:01	12	1	9	9	FFVWVIILF	FFVWVIILF	FFVWVIILF	0.001573	14
HLA-B*15:01	147	1	9	9	EIENFGAQH	EIENFGAQH	EIENFGAQH	0.001572	12
HLA-A*02:03	32	1	9	9	HLASTDQLK	HLASTDQLK	HLASTDQLK	0.001571	13
HLA-B*35:01	108	1	9	9	LYDRLASTV	LYDRLASTV	LYDRLASTV	0.001558	8.4
HLA-A*26:01	85	1	9	9	GILGSLGLR	GILGSLGLR	GILGSLGLR	0.001556	8.8
HLA-B*08:01	158	1	9	9	LITSTVTGI	LITSTVTGI	LITSTVTGI	0.001555	16
HLA-A*02:01	146	1	9	9	TTELRTYTI	TTELRTYTI	TTELRTYTI	0.001554	12
HLA-A*02:03	38	1	9	9	YAFHKDGAF	YAFHKDGAF	YAFHKDGAF	0.001549	13
HLA-A*23:01	48	1	9	9	LANETTQAL	LANETTQAL	LANETTQAL	0.001542	6.9
HLA-A*68:01	163	1	9	9	YTILNRKAI	YTILNRKAI	YTILNRKAI	0.001541	13
HLA-A*68:02	5	1	9	9	YYATSYLEY	YYATSYLEY	YYATSYLEY	0.001541	13
HLA-A*24:02	81	1	9	9	VWVIILFQK	VWVIILFQK	VWVIILFQK	0.001534	6.8
HLA-B*08:01	10	1	9	9	AEGIYTEGL	AEGIYTEGL	AEGIYTEGL	0.001534	16
HLA-B*35:01	99	1	9	9	TIIGTNGNH	TIIGTNGNH	TIIGTNGNH	0.001533	8.5
HLA-A*02:01	69	1	9	9	EWAENCYNL	EWAENCYNL	EWAENCYNL	0.001525	12
HLA-A*02:01	3	1	9	9	ISDRATRKY	ISDRATRKY	ISDRATRKY	0.001517	12
HLA-B*44:02	86	1	9	9	DHLASTDQL	DHLASTDQL	DHLASTDQL	0.001514	6.6
HLA-B*44:02	38	1	9	9	YAFHKDGAF	YAFHKDGAF	YAFHKDGAF	0.001511	6.6
HLA-A*68:01	13	1	9	9	GTGPCPGDY	GTGPCPGDY	GTGPCPGDY	0.001509	14
HLA-B*35:01	131	1	9	9	ITSTVTGIL	ITSTVTGIL	ITSTVTGIL	0.001508	8.5
HLA-B*53:01	20	1	9	9	TELRTYTIL	TELRTYTIL	TELRTYTIL	0.001508	7.8
HLA-A*68:02	140	1	9	9	KFRKSSFFV	KFRKSSFFV	KFRKSSFFV	0.001507	13
HLA-A*30:02	144	1	9	9	GIIIAIIAL	GIIIAIIAL	GIIIAIIAL	0.001501	19
HLA-A*30:02	102	1	9	9	GLSLLQLPR	GLSLLQLPR	GLSLLQLPR	0.001501	19
HLA-A*26:01	35	1	9	9	LEVTEIDQL	LEVTEIDQL	LEVTEIDQL	0.001501	8.9
HLA-B*15:01	158	1	9	9	LITSTVTGI	LITSTVTGI	LITSTVTGI	0.001498	12
HLA-A*32:01	102	1	9	9	GLSLLQLPR	GLSLLQLPR	GLSLLQLPR	0.001498	8.7
HLA-B*51:01	130	1	9	9	NINADIGEW	NINADIGEW	NINADIGEW	0.001497	16
HLA-B*58:01	4	1	9	9	FHKDGAFFL	FHKDGAFFL	FHKDGAFFL	0.001496	11
HLA-B*07:02	5	1	9	9	YYATSYLEY	YYATSYLEY	YYATSYLEY	0.001491	9.7
HLA-A*23:01	25	1	9	9	AEGVIAFLI	AEGVIAFLI	AEGVIAFLI	0.001485	7
HLA-A*31:01	69	1	9	9	EWAENCYNL	EWAENCYNL	EWAENCYNL	0.001482	14
HLA-A*68:01	58	1	9	9	VIILFQKAF	VIILFQKAF	VIILFQKAF	0.001482	14
HLA-A*26:01	160	1	9	9	NQNALVCGL	NQNALVCGL	NQNALVCGL	0.001479	9
HLA-A*01:01	118	1	9	9	KNSPGMVPL	KNSPGMVPL	KNSPGMVPL	0.001476	12
HLA-A*02:03	37	1	9	9	AQHSTTLFK	AQHSTTLFK	AQHSTTLFK	0.001476	14
HLA-B*51:01	61	1	9	9	ILNRKAIDF	ILNRKAIDF	ILNRKAIDF	0.001475	16
HLA-A*02:06	84	1	9	9	AFHKDGAFF	AFHKDGAFF	AFHKDGAFF	0.00147	17
HLA-A*02:01	15	1	9	9	KCNPNLHYW	KCNPNLHYW	KCNPNLHYW	0.001464	12
HLA-B*07:02	141	1	9	9	GITGIIIAI	GITGIIIAI	GITGIIIAI	0.001461	9.8
HLA-A*68:02	32	1	9	9	HLASTDQLK	HLASTDQLK	HLASTDQLK	0.001459	13
HLA-A*32:01	72	1	9	9	SPGMVPLHI	SPGMVPLHI	SPGMVPLHI	0.001458	8.9
HLA-B*40:01	37	1	9	9	AQHSTTLFK	AQHSTTLFK	AQHSTTLFK	0.001457	6.4
HLA-A*68:01	53	1	9	9	LVPKNSPGM	LVPKNSPGM	LVPKNSPGM	0.001454	14
HLA-A*26:01	30	1	9	9	VIAFLILAK	VIAFLILAK	VIAFLILAK	0.001451	9.1
HLA-B*35:01	109	1	9	9	GLMHNQNAL	GLMHNQNAL	GLMHNQNAL	0.001449	8.6
HLA-A*02:01	163	1	9	9	YTILNRKAI	YTILNRKAI	YTILNRKAI	0.001444	12
HLA-A*03:01	52	1	9	9	IIIAIIALL	IIIAIIALL	IIIAIIALL	0.001442	10
HLA-A*01:01	70	1	9	9	ETAATIIGT	ETAATIIGT	ETAATIIGT	0.001441	12
HLA-B*44:03	48	1	9	9	LANETTQAL	LANETTQAL	LANETTQAL	0.001439	6.9
HLA-A*24:02	48	1	9	9	LANETTQAL	LANETTQAL	LANETTQAL	0.001438	7
HLA-A*02:06	90	1	9	9	GPCPGDYAF	GPCPGDYAF	GPCPGDYAF	0.001437	17
HLA-A*01:01	51	1	9	9	FLYDRLAST	FLYDRLAST	FLYDRLAST	0.001432	12
HLA-A*30:02	86	1	9	9	DHLASTDQL	DHLASTDQL	DHLASTDQL	0.00143	20
HLA-B*15:01	29	1	9	9	NETTQALQL	NETTQALQL	NETTQALQL	0.001427	13
HLA-A*02:06	137	1	9	9	YTEGLMHNQ	YTEGLMHNQ	YTEGLMHNQ	0.001426	17
HLA-B*07:02	134	1	9	9	TTPENITTA	TTPENITTA	TTPENITTA	0.001426	9.9
HLA-B*08:01	157	1	9	9	ITKGRISDR	ITKGRISDR	ITKGRISDR	0.001425	17
HLA-A*01:01	49	1	9	9	THTSGPSVM	THTSGPSVM	THTSGPSVM	0.001422	12
[truncated: 1,673 more rows]
