# Supplementary material for: In silico prediction of B-cell and T-cell epitopes of the Sudan Ebola virus glycoprotein for peptide-based vaccine design
Source: Research Square preprint supplement (doi:10.21203/rs.3.rs-6600860/v1), 2025-05-09
Supplement: Supplementary file 2 [file d1ca70dfefa2a049dc97131c.xlsx]

## Sheet: A1
RES	ID	PEP	AFF	AFF_RESCALE	CLE	TAP	COMB	MHC_SUPERTYPE
205	Q7T9D9.1	YTENTSSYY	0.8151	3.4607	0.9708	2.88	3.7503	A1
209	Q7T9D9.1	TSSYYATSY	0.7094	3.0121	0.927	3.081	3.3052	A1
331	Q7T9D9.1	ISDRATRKY	0.5357	2.2744	0.9114	2.944	2.5583	A1
212	Q7T9D9.1	YYATSYLEY	0.4301	1.8263	0.9704	3.24	2.1339	A1
154	Q7T9D9.1	HKDGAFFLY	0.3615	1.5348	0.9656	2.602	1.8097	A1
143	Q7T9D9.1	GTGPCPGDY	0.3439	1.4602	0.9146	2.512	1.723	A1
619	Q7T9D9.1	ITDKINQII	0.3128	1.3282	0.48	0.501	1.4253	A1
282	Q7T9D9.1	NADIGEWAF	0.1927	0.8183	0.579	2.457	1.028	A1
76	Q7T9D9.1	STDIPSATK	0.1981	0.841	0.9742	0.367	1.0055	A1
526	Q7T9D9.1	AAGIAWIPY	0.1532	0.6505	0.9589	3.099	0.9493	A1
381	Q7T9D9.1	ITETAATII	0.1996	0.8474	0.5282	0.402	0.9467	A1
565	Q7T9D9.1	TTQALQLFL	0.1957	0.8309	0.4546	0.713	0.9347	A1
482	Q7T9D9.1	ITSTVTGIL	0.1641	0.6969	0.9206	1	0.8849	A1
543	Q7T9D9.1	YTEGLMHNQ	0.205	0.8703	0.0331	-0.282	0.8611	A1
576	Q7T9D9.1	TTELRTYTI	0.1655	0.7028	0.7522	0.502	0.8407	A1
217	Q7T9D9.1	YLEYEIENF	0.1403	0.5958	0.5684	2.444	0.8032	A1
16	Q7T9D9.1	KSSFFVWVI	0.1513	0.6424	0.688	0.81	0.7861	A1

## Sheet: A2
RES	ID	PEP	AFF	AFF_RESCALE	CLE	TAP	COMB	MHC_SUPERTYPE
160	Q7T9D9.1	FLYDRLAST	0.8216	1.2248	0.0601	-0.699	1.1989	A2
661	Q7T9D9.1	IIIAIIALL	0.6663	0.9933	0.9607	1.145	1.1946	A2
254	Q7T9D9.1	FQLNDTIHL	0.6511	0.9705	0.9226	1.001	1.159	A2
547	Q7T9D9.1	LMHNQNALV	0.6551	0.9766	0.9323	0.44	1.1385	A2
25	Q7T9D9.1	ILFQKAFSM	0.5663	0.8441	0.8715	0.468	0.9982	A2
395	Q7T9D9.1	HMQISTIGI	0.535	0.7974	0.9221	0.674	0.9695	A2
29	Q7T9D9.1	KAFSMPLGV	0.5618	0.8375	0.4257	0.537	0.9282	A2
37	Q7T9D9.1	VVTNSTLEV	0.5058	0.7539	0.8863	0.449	0.9093	A2
273	Q7T9D9.1	LIWTLDANI	0.5006	0.7462	0.763	0.971	0.9092	A2
667	Q7T9D9.1	ALLCVCKLL	0.4428	0.6601	0.9588	1.145	0.8612	A2
546	Q7T9D9.1	GLMHNQNAL	0.4606	0.6865	0.9288	0.693	0.8605	A2
657	Q7T9D9.1	GITGIIIAI	0.5104	0.7608	0.4748	0.457	0.8549	A2
660	Q7T9D9.1	GIIIAIIAL	0.451	0.6723	0.8469	0.983	0.8485	A2
234	Q7T9D9.1	FKIDNNTFV	0.4555	0.679	0.9614	0.386	0.8425	A2
176	Q7T9D9.1	FAEGVIAFL	0.4269	0.6363	0.9279	0.909	0.821	A2
481	Q7T9D9.1	LITSTVTGI	0.4431	0.6605	0.7514	0.601	0.8033	A2
27	Q7T9D9.1	FQKAFSMPL	0.3988	0.5946	0.9006	0.981	0.7787	A2

## Sheet: A3
RES	ID	PEP	AFF	AFF_RESCALE	CLE	TAP	COMB	MHC_SUPERTYPE
580	Q7T9D9.1	RTYTILNRK	0.7675	1.4444	0.8871	0.922	1.6236	A3
489	Q7T9D9.1	ILGSLGLRK	0.7674	1.4443	0.8448	0.314	1.5868	A3
330	Q7T9D9.1	RISDRATRK	0.6879	1.2947	0.961	0.803	1.479	A3
164	Q7T9D9.1	RLASTVIYR	0.6965	1.3109	0.4534	1.626	1.4602	A3
180	Q7T9D9.1	VIAFLILAK	0.7133	1.3425	0.2941	0.642	1.4187	A3
56	Q7T9D9.1	HLASTDQLK	0.6646	1.2509	0.8242	0.271	1.388	A3
227	Q7T9D9.1	AQHSTTLFK	0.6803	1.2804	0.0914	0.684	1.3283	A3
498	Q7T9D9.1	RSRRQTNTK	0.582	1.0953	0.9458	0.899	1.2822	A3
665	Q7T9D9.1	IIALLCVCK	0.5063	0.9529	0.7446	0.787	1.1039	A3
502	Q7T9D9.1	QTNTKATGK	0.5309	0.9993	0.4309	0.494	1.0886	A3
488	Q7T9D9.1	GILGSLGLR	0.4451	0.8377	0.8165	1.462	1.0333	A3
209	Q7T9D9.1	TSSYYATSY	0.382	0.719	0.927	3.081	1.0121	A3
5	Q7T9D9.1	SLLQLPRDK	0.455	0.8564	0.5438	0.603	0.9681	A3
3	Q7T9D9.1	GLSLLQLPR	0.4293	0.808	0.6243	1.291	0.9662	A3
76	Q7T9D9.1	STDIPSATK	0.4012	0.7551	0.9742	0.367	0.9196	A3
235	Q7T9D9.1	KIDNNTFVR	0.3658	0.6885	0.8557	1.439	0.8888	A3
326	Q7T9D9.1	ITKGRISDR	0.315	0.5929	0.8808	1.616	0.8058	A3
566	Q7T9D9.1	TQALQLFLR	0.3522	0.6629	0.2217	1.566	0.7744	A3
541	Q7T9D9.1	GIYTEGLMH	0.4198	0.7901	0.0512	-0.566	0.7695	A3
572	Q7T9D9.1	FLRATTELR	0.3613	0.6799	0.061	1.506	0.7644	A3
8	Q7T9D9.1	QLPRDKFRK	0.342	0.6437	0.5638	0.53	0.7548	A3

## Sheet: A24
RES	ID	PEP	AFF	AFF_RESCALE	CLE	TAP	COMB	MHC_SUPERTYPE
212	Q7T9D9.1	YYATSYLEY	0.6479	1.3796	0.9704	3.24	1.6871	A24
103	Q7T9D9.1	EWAENCYNL	0.4309	0.9174	0.9693	0.984	1.112	A24
233	Q7T9D9.1	LFKIDNNTF	0.3761	0.8009	0.9357	2.714	1.077	A24
21	Q7T9D9.1	VWVIILFQK	0.4113	0.8757	0.9468	0.746	1.055	A24
152	Q7T9D9.1	AFHKDGAFF	0.3991	0.8497	0.3507	2.824	1.0435	A24
175	Q7T9D9.1	NFAEGVIAF	0.3674	0.7823	0.5789	2.803	1.0093	A24
161	Q7T9D9.1	LYDRLASTV	0.4043	0.8609	0.4837	0.302	0.9486	A24
650	Q7T9D9.1	QWIPAGIGI	0.4074	0.8675	0.0618	0.995	0.9265	A24
571	Q7T9D9.1	LFLRATTEL	0.3401	0.7242	0.9552	1.095	0.9222	A24
644	Q7T9D9.1	WWTGWRQWI	0.4031	0.8583	0.0549	0.859	0.9095	A24
13	Q7T9D9.1	KFRKSSFFV	0.3865	0.823	0.0632	0.499	0.8575	A24
18	Q7T9D9.1	SFFVWVIIL	0.2867	0.6104	0.9604	1.341	0.8215	A24
16	Q7T9D9.1	KSSFFVWVI	0.296	0.6302	0.688	0.81	0.7739	A24
211	Q7T9D9.1	SYYATSYLE	0.3808	0.8108	0.0666	-1.007	0.7705	A24

## Sheet: A26
RES	ID	PEP	AFF	AFF_RESCALE	CLE	TAP	COMB	MHC_SUPERTYPE
564	Q7T9D9.1	ETTQALQLF	0.626	1.68	0.6796	2.414	1.9027	A26
258	Q7T9D9.1	DTIHLHQQL	0.3879	1.0411	0.9373	0.827	1.223	A26
342	Q7T9D9.1	LVPKNSPGM	0.3926	1.0537	0.8058	0.293	1.1892	A26
379	Q7T9D9.1	ETITETAAT	0.456	1.2236	0.0335	-0.911	1.1831	A26
661	Q7T9D9.1	IIIAIIALL	0.3507	0.9411	0.9607	1.145	1.1425	A26
44	Q7T9D9.1	EVTEIDQLV	0.3573	0.9589	0.9651	0.261	1.1167	A26
383	Q7T9D9.1	ETAATIIGT	0.4262	1.1436	0.0413	-0.904	1.1046	A26
540	Q7T9D9.1	EGIYTEGLM	0.3918	1.0516	0.0611	0.057	1.0636	A26
387	Q7T9D9.1	TIIGTNGNH	0.3633	0.9749	0.0332	-0.205	0.9696	A26
168	Q7T9D9.1	TVIYRGVNF	0.295	0.7916	0.161	2.775	0.9545	A26
191	Q7T9D9.1	ETFLQSPPI	0.2973	0.7978	0.7708	0.522	0.9395	A26
248	Q7T9D9.1	HTPQFLFQL	0.2702	0.7252	0.9435	0.682	0.9008	A26
527	Q7T9D9.1	AGIAWIPYF	0.2492	0.6688	0.5116	2.635	0.8773	A26
459	Q7T9D9.1	TTPENITTA	0.287	0.7701	0.8599	-0.545	0.8718	A26
485	Q7T9D9.1	TVTGILGSL	0.2415	0.6481	0.9737	1.09	0.8486	A26
221	Q7T9D9.1	EIENFGAQH	0.3111	0.835	0.2711	-0.807	0.8353	A26
234	Q7T9D9.1	FKIDNNTFV	0.247	0.6629	0.9614	0.386	0.8264	A26
91	Q7T9D9.1	GVPPKVVSY	0.1967	0.528	0.9787	2.923	0.8209	A26
582	Q7T9D9.1	YTILNRKAI	0.2749	0.7377	0.1464	0.572	0.7882	A26
19	Q7T9D9.1	FFVWVIILF	0.184	0.4938	0.9019	2.739	0.766	A26
204	Q7T9D9.1	NYTENTSSY	0.1702	0.4568	0.977	3.237	0.7652	A26

## Sheet: B7
RES	ID	PEP	AFF	AFF_RESCALE	CLE	TAP	COMB	MHC_SUPERTYPE
410	Q7T9D9.1	IPSSSPTTA	0.676	1.3041	0.9649	-0.87	1.4053	B7
343	Q7T9D9.1	VPKNSPGMV	0.6008	1.1591	0.8732	0.118	1.2959	B7
246	Q7T9D9.1	RPHTPQFLF	0.4885	0.9425	0.9712	2.365	1.2064	B7
561	Q7T9D9.1	LANETTQAL	0.5276	1.0179	0.9622	0.868	1.2056	B7
404	Q7T9D9.1	RPSSSQIPS	0.6338	1.2227	0.3501	-2.301	1.1601	B7
347	Q7T9D9.1	SPGMVPLHI	0.4927	0.9505	0.9347	0.261	1.1037	B7
145	Q7T9D9.1	GPCPGDYAF	0.3998	0.7712	0.9364	2.07	1.0152	B7
450	Q7T9D9.1	GPTTEAPTL	0.4258	0.8215	0.9729	0.29	0.982	B7
532	Q7T9D9.1	IPYFGPGAE	0.5332	1.0287	0.0898	-1.716	0.9564	B7
414	Q7T9D9.1	SPTTAPSPE	0.4642	0.8956	0.1756	-1.799	0.832	B7
226	Q7T9D9.1	GAQHSTTLF	0.2816	0.5433	0.9289	2.271	0.7962	B7
334	Q7T9D9.1	RATRKYSDL	0.3228	0.6228	0.7673	1.076	0.7916	B7
362	Q7T9D9.1	LPSQNSTEG	0.3989	0.7696	0.5557	-1.69	0.7685	B7
9	Q7T9D9.1	LPRDKFRKS	0.4575	0.8827	0.084	-2.546	0.768	B7

## Sheet: B8
RES	ID	PEP	AFF	AFF_RESCALE	CLE	TAP	COMB	MHC_SUPERTYPE
11	Q7T9D9.1	RDKFRKSSF	0.3809	1.3009	0.1432	2.324	1.4386	B8
582	Q7T9D9.1	YTILNRKAI	0.3603	1.2304	0.1464	0.572	1.2809	B8
23	Q7T9D9.1	VIILFQKAF	0.2949	1.0072	0.4349	2.738	1.2093	B8
225	Q7T9D9.1	FGAQHSTTL	0.3094	1.0565	0.6582	0.751	1.1928	B8
162	Q7T9D9.1	YDRLASTVI	0.3195	1.0911	0.5267	0.304	1.1853	B8
132	Q7T9D9.1	FPRCRYVHK	0.2671	0.912	0.9702	0.084	1.0617	B8
186	Q7T9D9.1	LAKPKETFL	0.2359	0.8055	0.9621	1.018	1.0007	B8
185	Q7T9D9.1	ILAKPKETF	0.2142	0.7315	0.8432	2.642	0.9901	B8
62	Q7T9D9.1	QLKSVGLNL	0.2159	0.7372	0.9754	0.846	0.9258	B8
151	Q7T9D9.1	YAFHKDGAF	0.1916	0.6545	0.5303	2.54	0.861	B8
334	Q7T9D9.1	RATRKYSDL	0.1994	0.6809	0.7673	1.076	0.8498	B8
19	Q7T9D9.1	FFVWVIILF	0.153	0.5225	0.9019	2.739	0.7947	B8
233	Q7T9D9.1	LFKIDNNTF	0.1394	0.4762	0.9357	2.714	0.7523	B8

## Sheet: B27
RES	ID	PEP	AFF	AFF_RESCALE	CLE	TAP	COMB	MHC_SUPERTYPE
595	Q7T9D9.1	RRWGGTCRI	0.5739	1.5257	0.9709	1.205	1.7316	B27
329	Q7T9D9.1	GRISDRATR	0.5326	1.4157	0.825	1.682	1.6236	B27
337	Q7T9D9.1	RKYSDLVPK	0.469	1.2468	0.7251	0.955	1.4033	B27
371	Q7T9D9.1	RRVGVNTQE	0.5169	1.3742	0.165	-1.067	1.3456	B27
648	Q7T9D9.1	WRQWIPAGI	0.4333	1.1519	0.5598	0.652	1.2685	B27
163	Q7T9D9.1	DRLASTVIY	0.3347	0.8898	0.9706	2.781	1.1745	B27
271	Q7T9D9.1	GRLIWTLDA	0.3599	0.9568	0.92	-0.48	1.0708	B27
27	Q7T9D9.1	FQKAFSMPL	0.3076	0.8177	0.9006	0.981	1.0018	B27
88	Q7T9D9.1	FRSGVPPKV	0.3157	0.8392	0.8848	0.392	0.9915	B27
500	Q7T9D9.1	RRQTNTKAT	0.3524	0.9367	0.1094	-0.233	0.9414	B27
579	Q7T9D9.1	LRTYTILNR	0.2877	0.7648	0.3679	1.492	0.8946	B27
559	Q7T9D9.1	RQLANETTQ	0.3008	0.7997	0.1284	0.28	0.833	B27
586	Q7T9D9.1	NRKAIDFLL	0.2341	0.6222	0.9645	1.244	0.8291	B27
264	Q7T9D9.1	QQLSNTTGR	0.2575	0.6846	0.3111	1.568	0.8097	B27
594	Q7T9D9.1	LRRWGGTCR	0.2164	0.5752	0.8323	1.792	0.7897	B27

## Sheet: B39
RES	ID	PEP	AFF	AFF_RESCALE	CLE	TAP	COMB	MHC_SUPERTYPE
627	Q7T9D9.1	IHDFIDNPL	0.5539	1.7732	0.9436	0.818	1.9557	B39
27	Q7T9D9.1	FQKAFSMPL	0.3896	1.2472	0.9006	0.981	1.4314	B39
18	Q7T9D9.1	SFFVWVIIL	0.338	1.0822	0.9604	1.341	1.2933	B39
577	Q7T9D9.1	TELRTYTIL	0.3405	1.0902	0.9264	0.826	1.2705	B39
254	Q7T9D9.1	FQLNDTIHL	0.3311	1.0599	0.9226	1.001	1.2483	B39
428	Q7T9D9.1	THTSGPSVM	0.326	1.0436	0.973	0.265	1.2028	B39
225	Q7T9D9.1	FGAQHSTTL	0.3258	1.043	0.6582	0.751	1.1793	B39
176	Q7T9D9.1	FAEGVIAFL	0.3006	0.9623	0.9279	0.909	1.1469	B39
55	Q7T9D9.1	DHLASTDQL	0.2793	0.8942	0.6691	0.765	1.0328	B39
303	Q7T9D9.1	GEELSFEAL	0.2474	0.792	0.9419	0.628	0.9647	B39
210	Q7T9D9.1	SSYYATSYL	0.2368	0.7582	0.8978	1.245	0.9551	B39
345	Q7T9D9.1	KNSPGMVPL	0.2321	0.743	0.9736	0.76	0.927	B39
354	Q7T9D9.1	HIPEGETTL	0.2046	0.6549	0.9708	1.025	0.8517	B39
14	Q7T9D9.1	FRKSSFFVW	0.2046	0.6551	0.7544	1.095	0.8231	B39
103	Q7T9D9.1	EWAENCYNL	0.1958	0.6269	0.9693	0.984	0.8215	B39
561	Q7T9D9.1	LANETTQAL	0.1969	0.6304	0.9622	0.868	0.8182	B39
175	Q7T9D9.1	NFAEGVIAF	0.1739	0.5568	0.5789	2.803	0.7838	B39

## Sheet: B44
RES	ID	PEP	AFF	AFF_RESCALE	CLE	TAP	COMB	MHC_SUPERTYPE
539	Q7T9D9.1	AEGIYTEGL	0.6645	1.6467	0.914	0.77	1.8223	B44
105	Q7T9D9.1	AENCYNLEI	0.6225	1.5427	0.9578	0.393	1.706	B44
577	Q7T9D9.1	TELRTYTIL	0.5416	1.3421	0.9264	0.826	1.5223	B44
177	Q7T9D9.1	AEGVIAFLI	0.5383	1.3341	0.5808	0.275	1.435	B44
563	Q7T9D9.1	NETTQALQL	0.4968	1.2312	0.9265	0.974	1.4189	B44
298	Q7T9D9.1	SEQLRGEEL	0.485	1.202	0.9053	0.888	1.3822	B44
43	Q7T9D9.1	LEVTEIDQL	0.4887	1.2111	0.7118	0.911	1.3634	B44
254	Q7T9D9.1	FQLNDTIHL	0.3233	0.8012	0.9226	1.001	0.9896	B44
521	Q7T9D9.1	QEQHNAAGI	0.3588	0.8892	0.1099	0.534	0.9324	B44
27	Q7T9D9.1	FQKAFSMPL	0.2847	0.7056	0.9006	0.981	0.8897	B44
474	Q7T9D9.1	QESTSNGLI	0.2906	0.7201	0.1422	0.263	0.7546	B44

[truncated: 4 more sheets: B58, B62, A1-B62, SORTED]
